# Supplementary material for: New bioactive steroids from the soft coral Klyxum flaccidum
Source: Royal Society of Chemistry journal article supplement (doi:10.1039/c4ra13977a), 2015-01-01
Supplement: c4ra13977a1.pdf [file c4ra13977a1.pdf]

## **New Bioactive Steroids from the Soft Coral *Klyxum flaccidum***

Chia-Ruei Tsai,<sup>a</sup> Chiung-Yao Huang,<sup>a</sup> Bo-Wei Chen,<sup>a</sup> Yi-Ying Tsai,<sup>a</sup> Shou-Ping Shih,<sup>b</sup> Tsong-Long Hwang,<sup>c</sup> Chang-Feng Dai,<sup>d</sup>  
Sheng-Yang Wang<sup>e</sup> and Jyh-Horng Sheu<sup>a,f,g,\*</sup>

<sup>a</sup> *Department of Marine Biotechnology and Resources, National Sun Yat-sen University, Kaohsiung 804, Taiwan*

<sup>b</sup> *Graduate Institute of Marine Biotechnology, National Dong Hwa University, Pingtung 944, Taiwan*

<sup>c</sup> *Graduate Institute of Natural Products, Chang Gung University, Taoyuan 333, Taiwan*

<sup>d</sup> *Institute of Oceanography, National Taiwan University, Taipei 112, Taiwan*

<sup>e</sup> *Department of Forestry, National Chung Hsing University, Taichung 402, Taiwan*

<sup>f</sup> *Department of Medical Research, China Medical University Hospital, China Medical University, Taichung 404, Taiwan*

<sup>g</sup> *Graduate Institute of Natural Products, Kaohsiung Medical University, Kaohsiung 807, Taiwan*

\*To whom correspondence should be addressed. Tel.: 886-7-5252000 ext. 5030, Fax: 886-7-5255020. E-mail: [sheu@mail.nsysu.edu.tw](mailto:sheu@mail.nsysu.edu.tw).

| <b>No</b>   | <b>Content</b>                                                                     | <b>page</b> | <b>No</b>   | <b>Content</b>                                                                     | <b>page</b> |
|-------------|------------------------------------------------------------------------------------|-------------|-------------|------------------------------------------------------------------------------------|-------------|
| <b>S1-1</b> | <sup>1</sup> H NMR spectrum (400 MHz) of compound <b>1</b> in CDCl <sub>3</sub> .  | <b>3</b>    | <b>S4-1</b> | <sup>1</sup> H NMR spectrum (400 MHz) of compound <b>4</b> in CDCl <sub>3</sub> .  | <b>24</b>   |
| <b>S1-2</b> | <sup>13</sup> C NMR spectrum (100 MHz) of compound <b>1</b> in CDCl <sub>3</sub> . | <b>4</b>    | <b>S4-2</b> | <sup>13</sup> C NMR spectrum (100 MHz) of compound <b>4</b> in CDCl <sub>3</sub> . | <b>25</b>   |
| <b>S1-3</b> | DEPT spectra (100 MHz) of compound <b>1</b> in CDCl <sub>3</sub> .                 | <b>5</b>    | <b>S4-3</b> | DEPT spectra (100 MHz) of compound <b>4</b> in CDCl <sub>3</sub> .                 | <b>26</b>   |
| <b>S1-4</b> | HMQC spectrum (400 MHz) of compound <b>1</b> in CDCl <sub>3</sub> .                | <b>6</b>    | <b>S4-4</b> | HMQC spectrum (400 MHz) of compound <b>4</b> in CDCl <sub>3</sub> .                | <b>27</b>   |
| <b>S1-5</b> | gCOSY spectrum (400 MHz) of compound <b>1</b> in CDCl <sub>3</sub> .               | <b>7</b>    | <b>S4-5</b> | gCOSY spectrum (400 MHz) of compound <b>4</b> in CDCl <sub>3</sub> .               | <b>28</b>   |
| <b>S1-6</b> | HMBC spectrum (400 MHz) of compound <b>1</b> in CDCl <sub>3</sub> .                | <b>8</b>    | <b>S4-6</b> | HMBC spectrum (400 MHz) of compound <b>4</b> in CDCl <sub>3</sub> .                | <b>29</b>   |
| <b>S1-7</b> | NOESY spectrum (400 MHz) of compound <b>1</b> in CDCl <sub>3</sub> .               | <b>9</b>    | <b>S4-7</b> | NOESY spectrum (400 MHz) of compound <b>4</b> in CDCl <sub>3</sub> .               | <b>30</b>   |
| <b>S2-1</b> | <sup>1</sup> H NMR spectrum (500 MHz) of compound <b>2</b> in CDCl <sub>3</sub> .  | <b>10</b>   | <b>S5-1</b> | <sup>1</sup> H NMR spectrum (500 MHz) of compound <b>5</b> in CDCl <sub>3</sub> .  | <b>31</b>   |
| <b>S2-2</b> | <sup>13</sup> C NMR spectrum (125 MHz) of compound <b>2</b> in CDCl <sub>3</sub> . | <b>11</b>   | <b>S5-2</b> | <sup>13</sup> C NMR spectrum (125 MHz) of compound <b>5</b> in CDCl <sub>3</sub> . | <b>32</b>   |
| <b>S2-3</b> | DEPT spectra (125 MHz) of compound <b>2</b> in CDCl <sub>3</sub> .                 | <b>12</b>   | <b>S5-3</b> | DEPT spectrum (125 MHz) of compound <b>5</b> in CDCl <sub>3</sub> .                | <b>33</b>   |
| <b>S2-4</b> | HMQC spectrum (500 MHz) of compound <b>2</b> in CDCl <sub>3</sub> .                | <b>13</b>   | <b>S5-4</b> | HMQC spectrum (500 MHz) of compound <b>5</b> in CDCl <sub>3</sub> .                | <b>34</b>   |
| <b>S2-5</b> | gCOSY spectrum (500 MHz) of compound <b>2</b> in CDCl <sub>3</sub> .               | <b>14</b>   | <b>S5-5</b> | gCOSY spectrum (500 MHz) of compound <b>5</b> in CDCl <sub>3</sub> .               | <b>35</b>   |
| <b>S2-6</b> | HMBC spectrum (500 MHz) of compound <b>2</b> in CDCl <sub>3</sub> .                | <b>15</b>   | <b>S5-6</b> | HMBC spectrum (500 MHz) of compound <b>5</b> in CDCl <sub>3</sub> .                | <b>36</b>   |
| <b>S2-7</b> | NOESY spectrum (500 MHz) of compound <b>2</b> in CDCl <sub>3</sub> .               | <b>16</b>   | <b>S5-7</b> | NOESY spectrum (500 MHz) of compound <b>5</b> in CDCl <sub>3</sub> .               | <b>37</b>   |
| <b>S3-1</b> | <sup>1</sup> H NMR spectrum (400 MHz) of compound <b>3</b> in CDCl <sub>3</sub> .  | <b>17</b>   | <b>S6-1</b> | <sup>1</sup> H NMR spectrum (400 MHz) of compound <b>6</b> in CDCl <sub>3</sub> .  | <b>38</b>   |
| <b>S3-2</b> | <sup>13</sup> C NMR spectrum (100 MHz) of compound <b>3</b> in CDCl <sub>3</sub> . | <b>18</b>   | <b>S6-2</b> | <sup>13</sup> C NMR spectrum (100 MHz) of compound <b>6</b> in CDCl <sub>3</sub> . | <b>39</b>   |
| <b>S3-3</b> | DEPT spectra (100 MHz) of compound <b>3</b> in CDCl <sub>3</sub> .                 | <b>19</b>   | <b>S6-3</b> | DEPT spectra (100 MHz) of compound <b>6</b> in CDCl <sub>3</sub> .                 | <b>40</b>   |
| <b>S3-4</b> | HMQC spectrum (400 MHz) of compound <b>3</b> in CDCl <sub>3</sub> .                | <b>20</b>   | <b>S6-4</b> | HMQC spectrum (400 MHz) of compound <b>6</b> in CDCl <sub>3</sub> .                | <b>41</b>   |
| <b>S3-5</b> | gCOSY spectrum (400 MHz) of compound <b>3</b> in CDCl <sub>3</sub> .               | <b>21</b>   | <b>S6-5</b> | gCOSY spectrum (400 MHz) of compound <b>6</b> in CDCl <sub>3</sub> .               | <b>42</b>   |
| <b>S3-6</b> | HMBC spectrum (400 MHz) of compound <b>3</b> in CDCl <sub>3</sub> .                | <b>22</b>   | <b>S6-6</b> | HMBC spectrum (400 MHz) of compound <b>6</b> in CDCl <sub>3</sub> .                | <b>43</b>   |
| <b>S3-7</b> | NOESY spectrum (400 MHz) of compound <b>3</b> in CDCl <sub>3</sub> .               | <b>23</b>   | <b>S6-7</b> | NOESY spectrum (400 MHz) of compound <b>6</b> in CDCl <sub>3</sub> .               | <b>44</b>   |

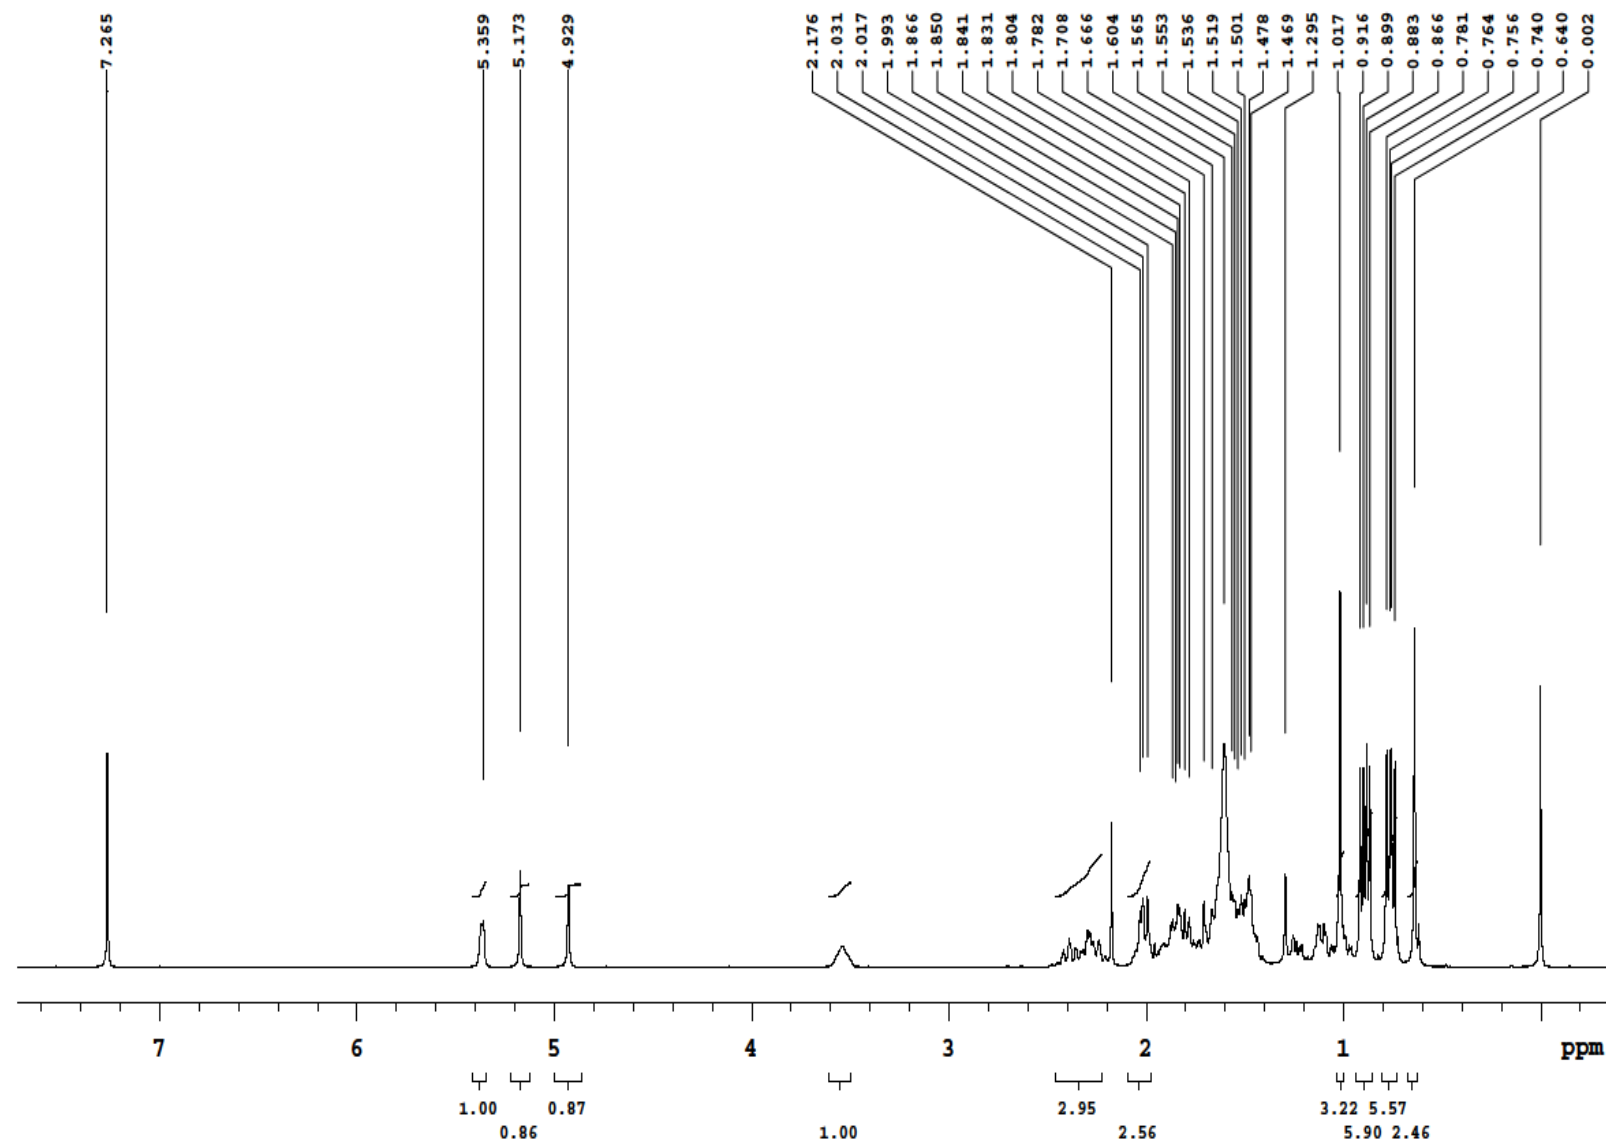

**Figure S1-1.**  $^1\text{H}$  NMR spectrum (400 MHz) of compound **1** in  $\text{CDCl}_3$

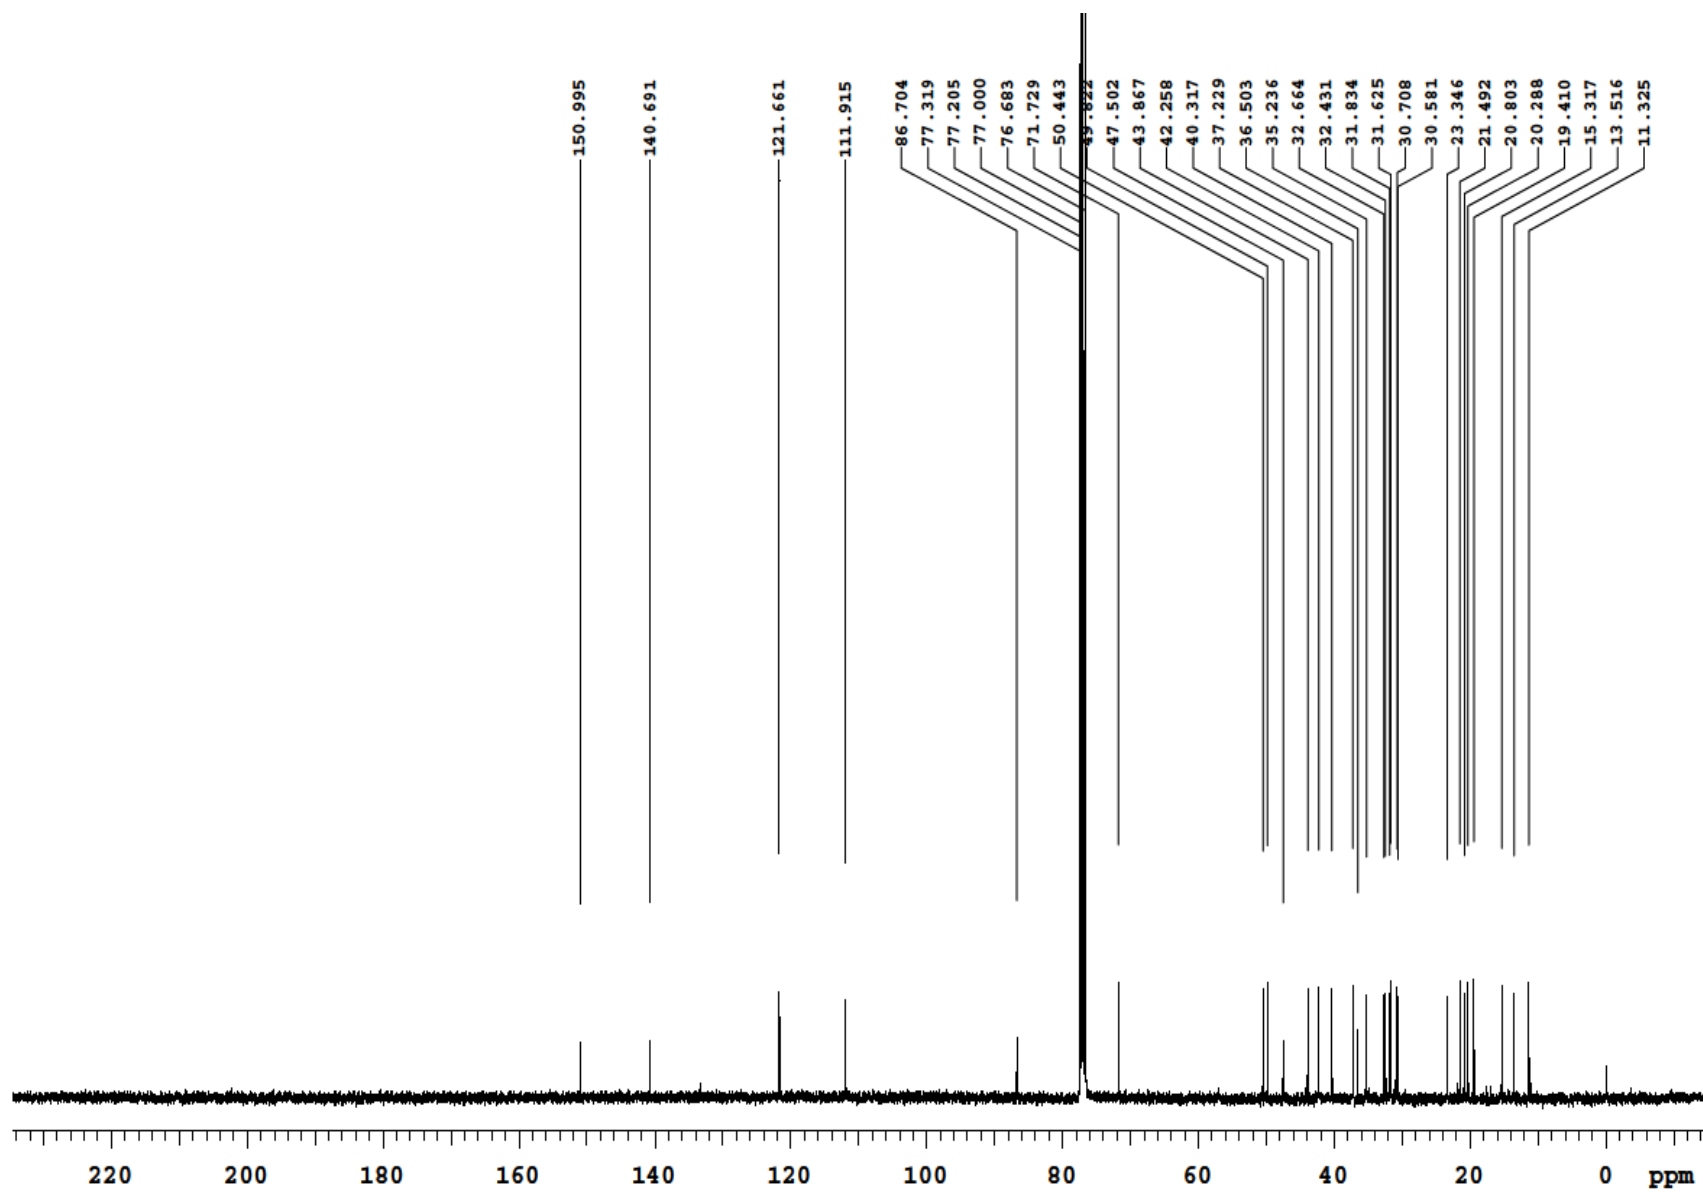

Figure S1-2. <sup>13</sup>C NMR spectrum (100 MHz) of compound **1** in CDCl<sub>3</sub>.



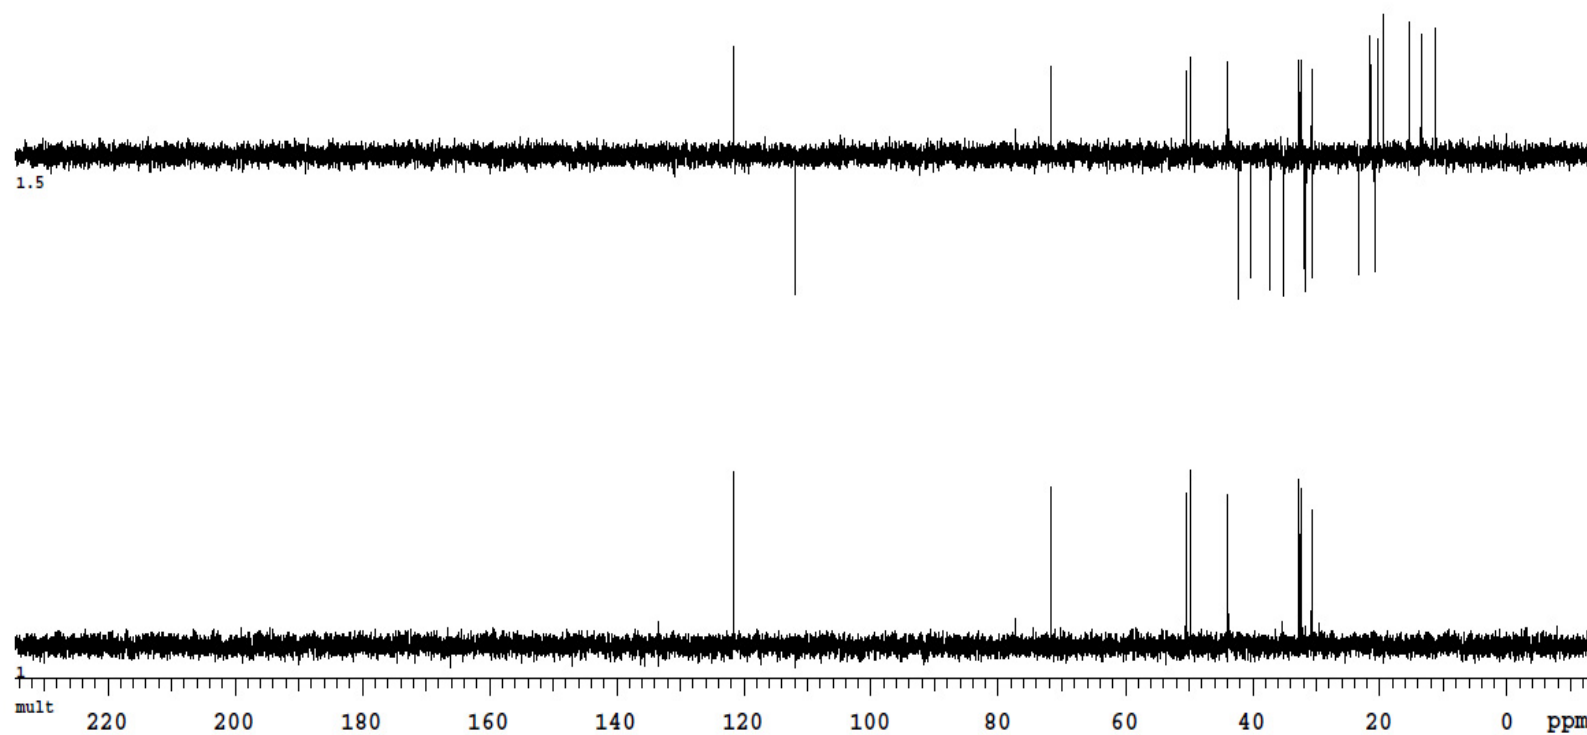

**Figure S1-3.** DEPT spectra (100 MHz) of compound **1** in CDCl<sub>3</sub>.

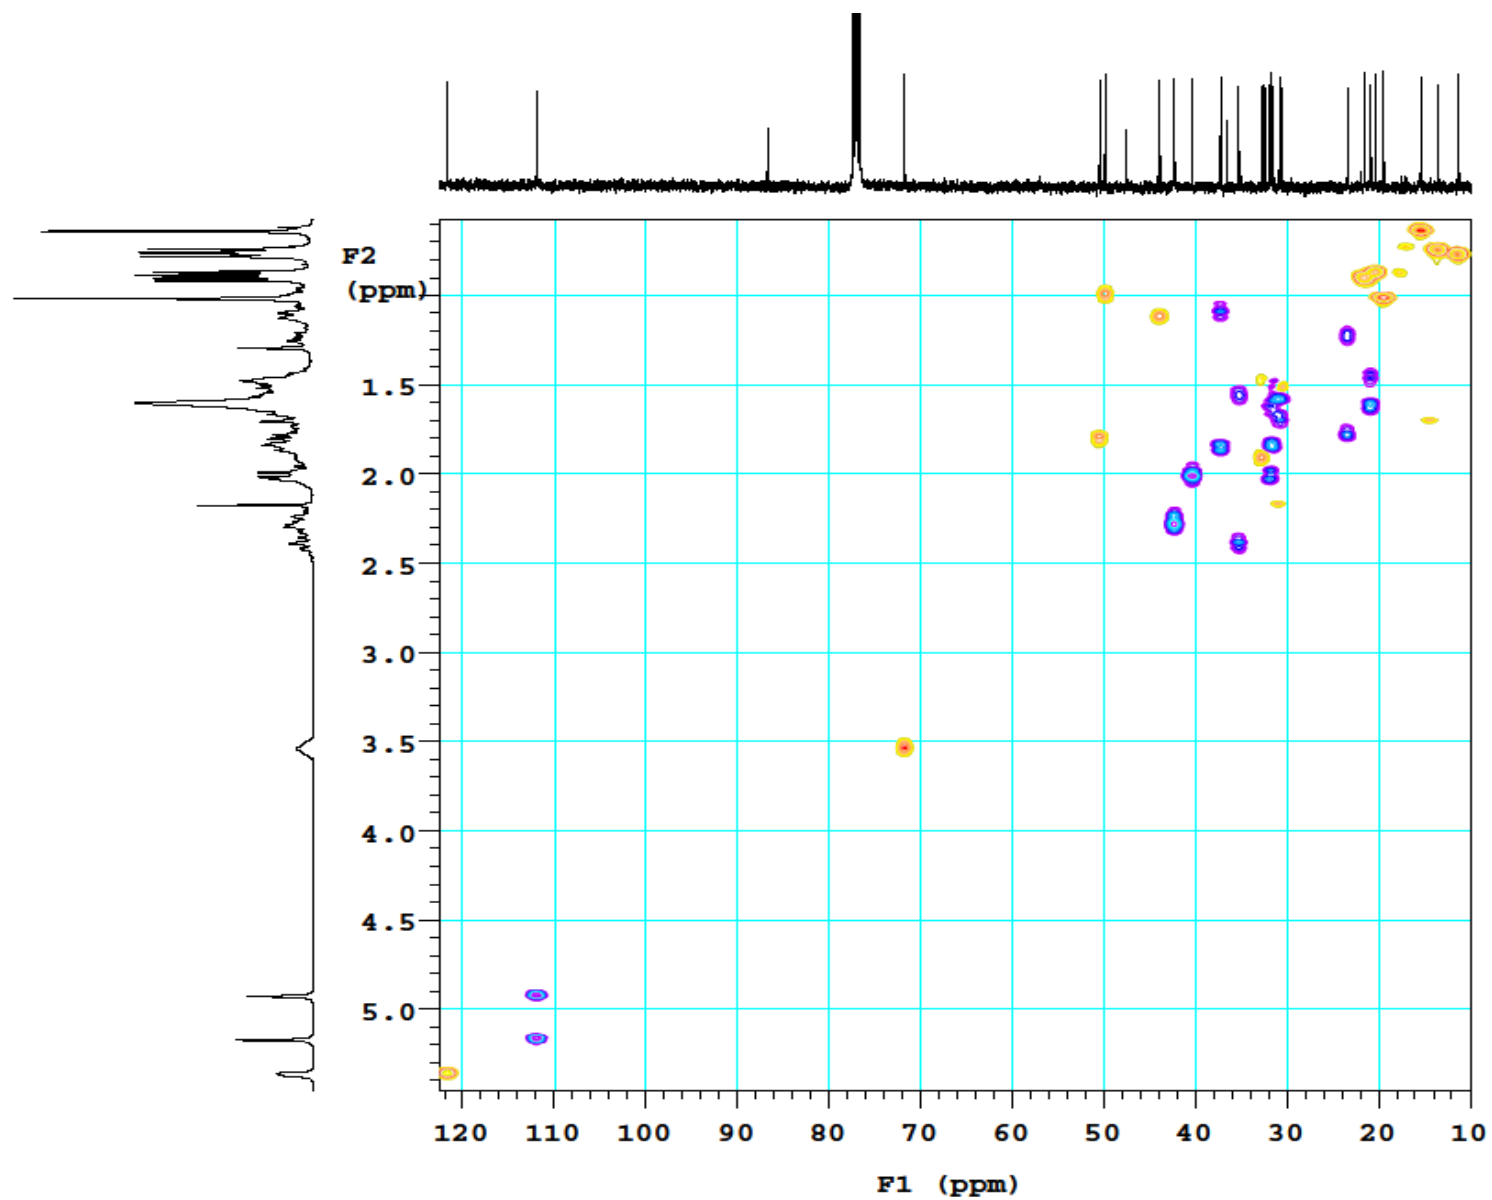

**Figure S1-4.** HMQC spectrum (400 MHz) of compound **1** in CDCl<sub>3</sub>.

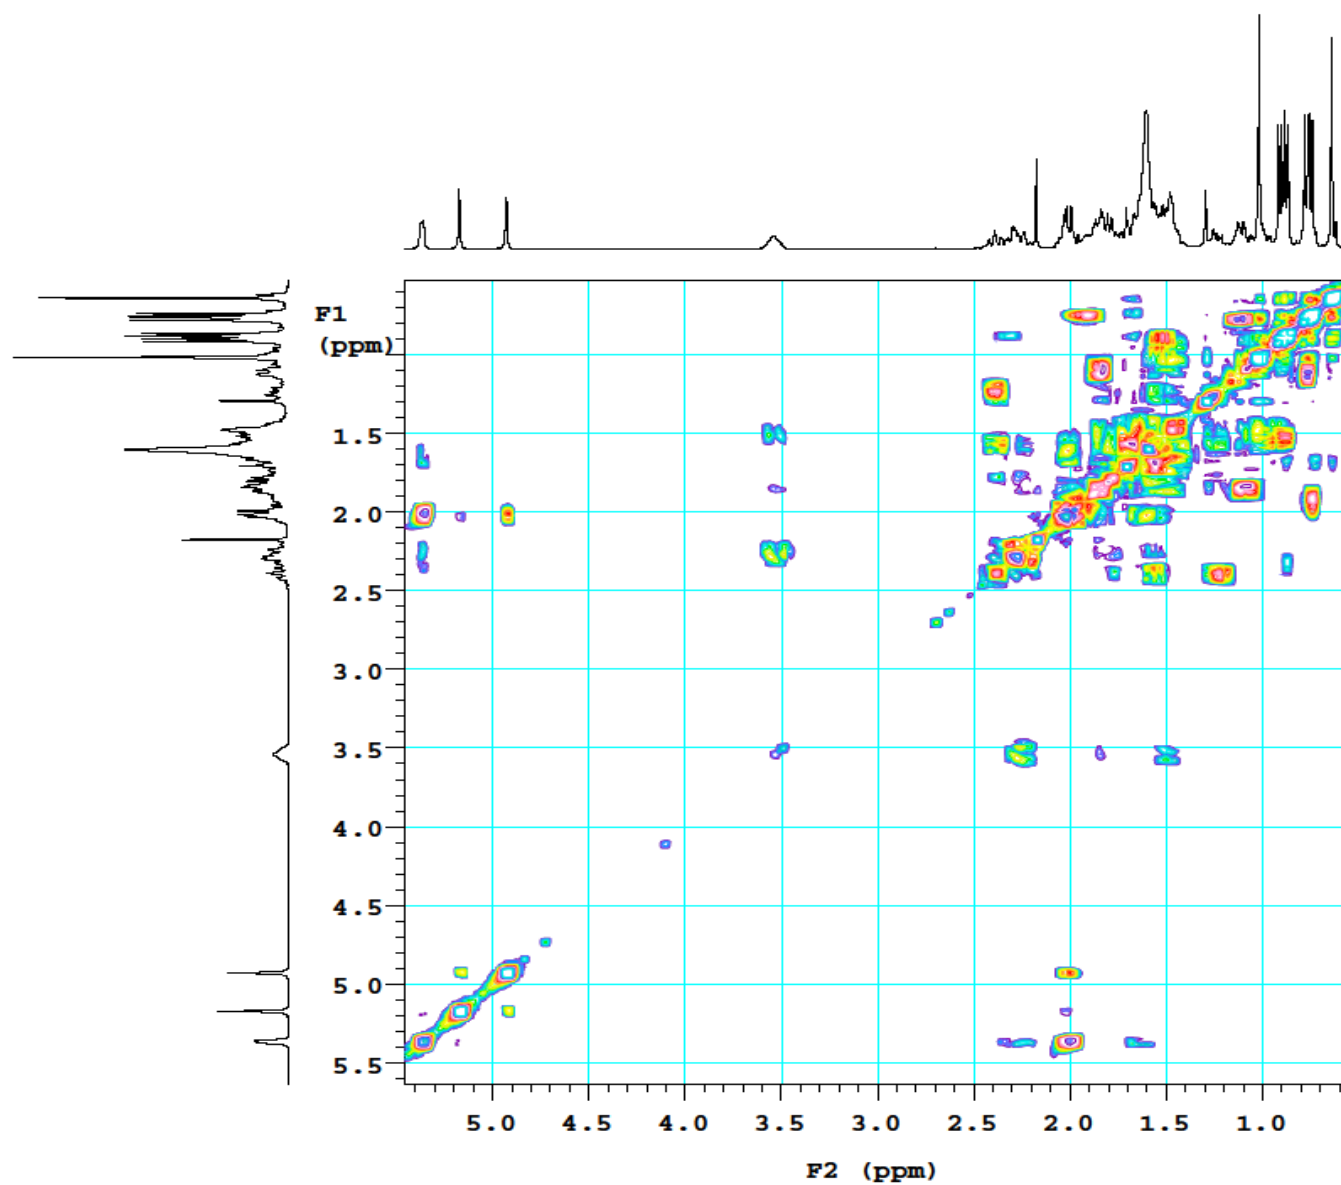

**Figure S1-5.** gCOSY spectrum (400 MHz) of compound **1** in CDCl<sub>3</sub>.

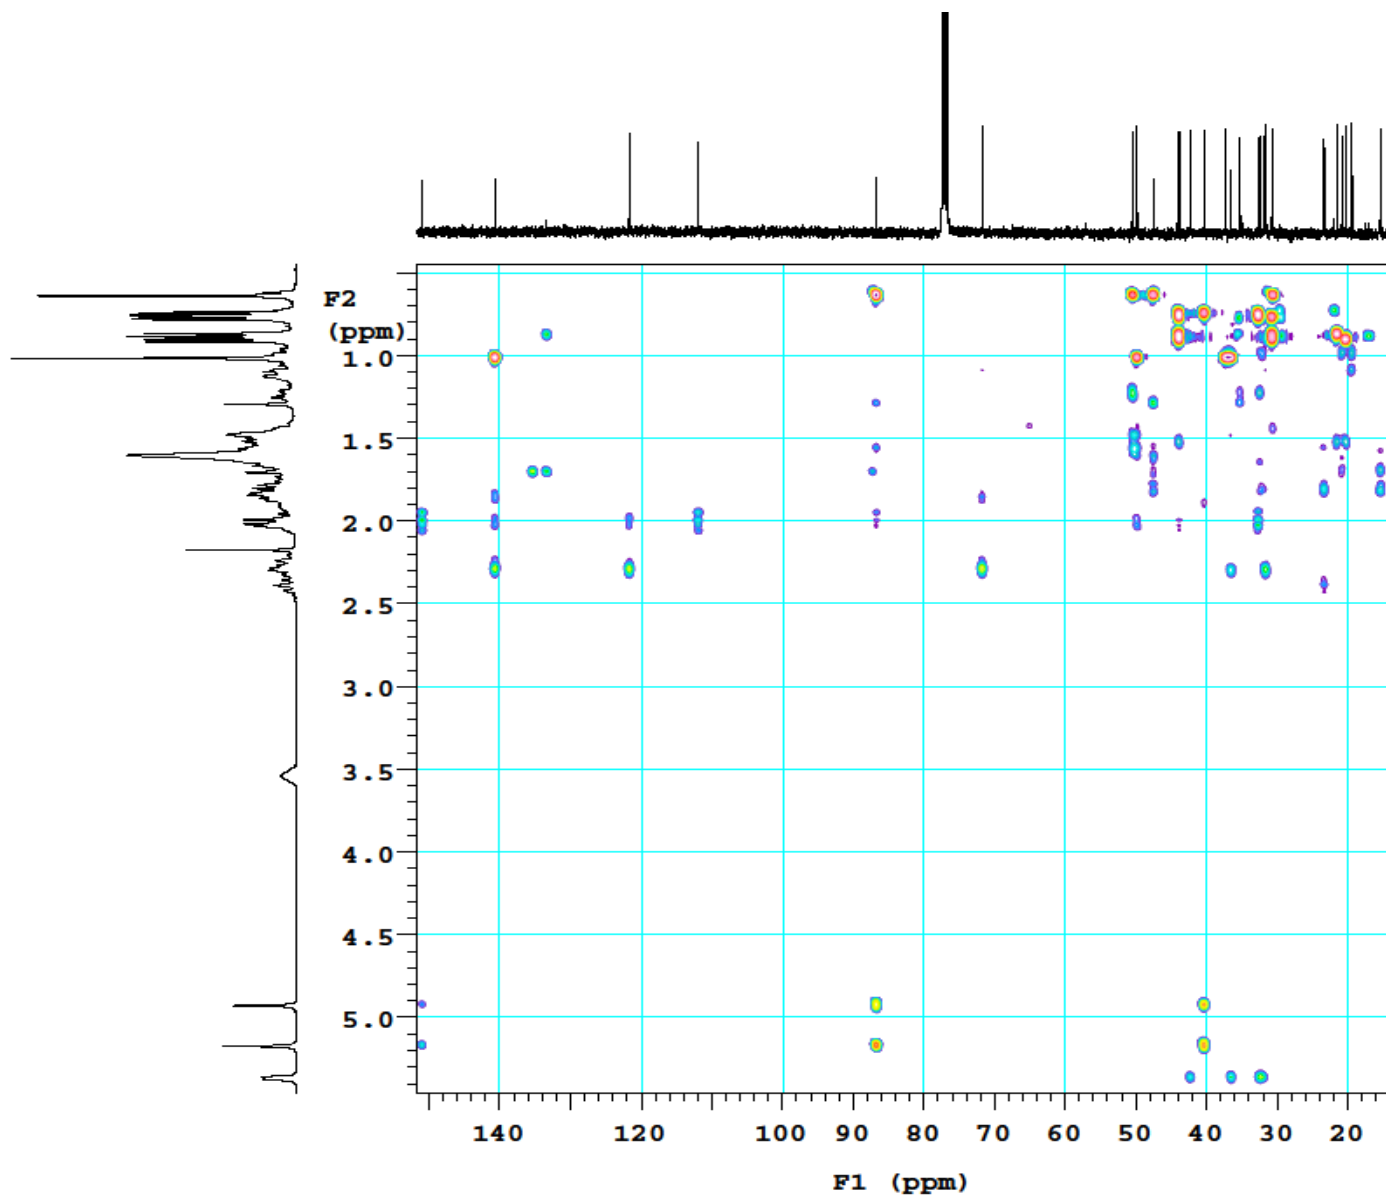

**Figure S1-6.** HMBC spectrum (400 MHz) of compound **1** in CDCl<sub>3</sub>.

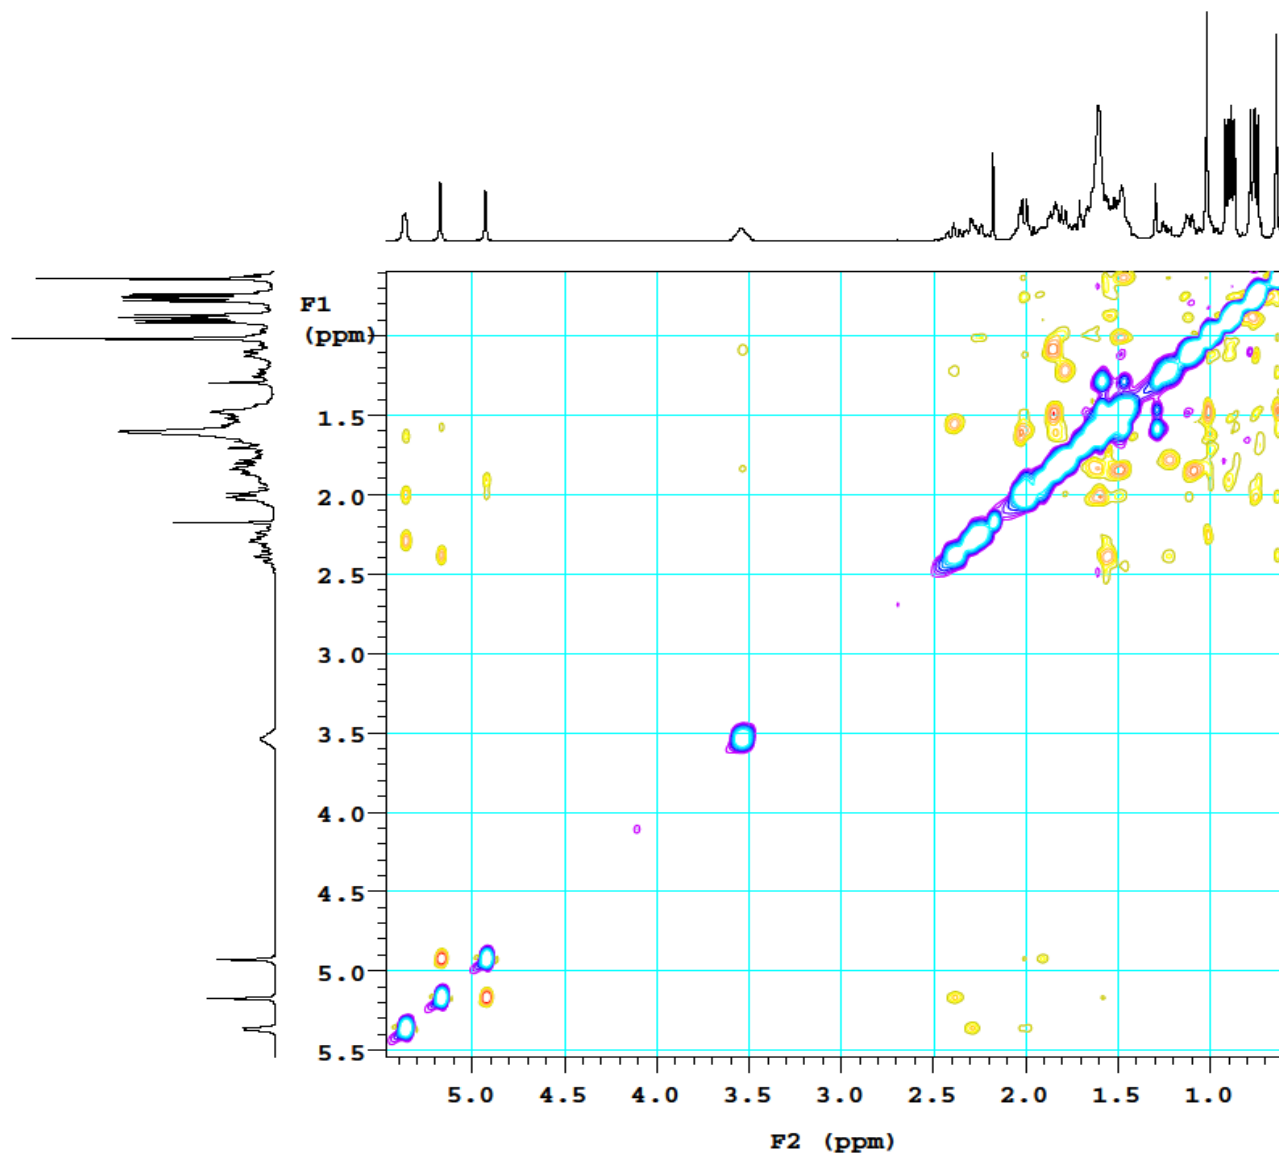

**Figure S1-7.** NOESY spectrum (400 MHz) of compound **1** in CDCl<sub>3</sub>.

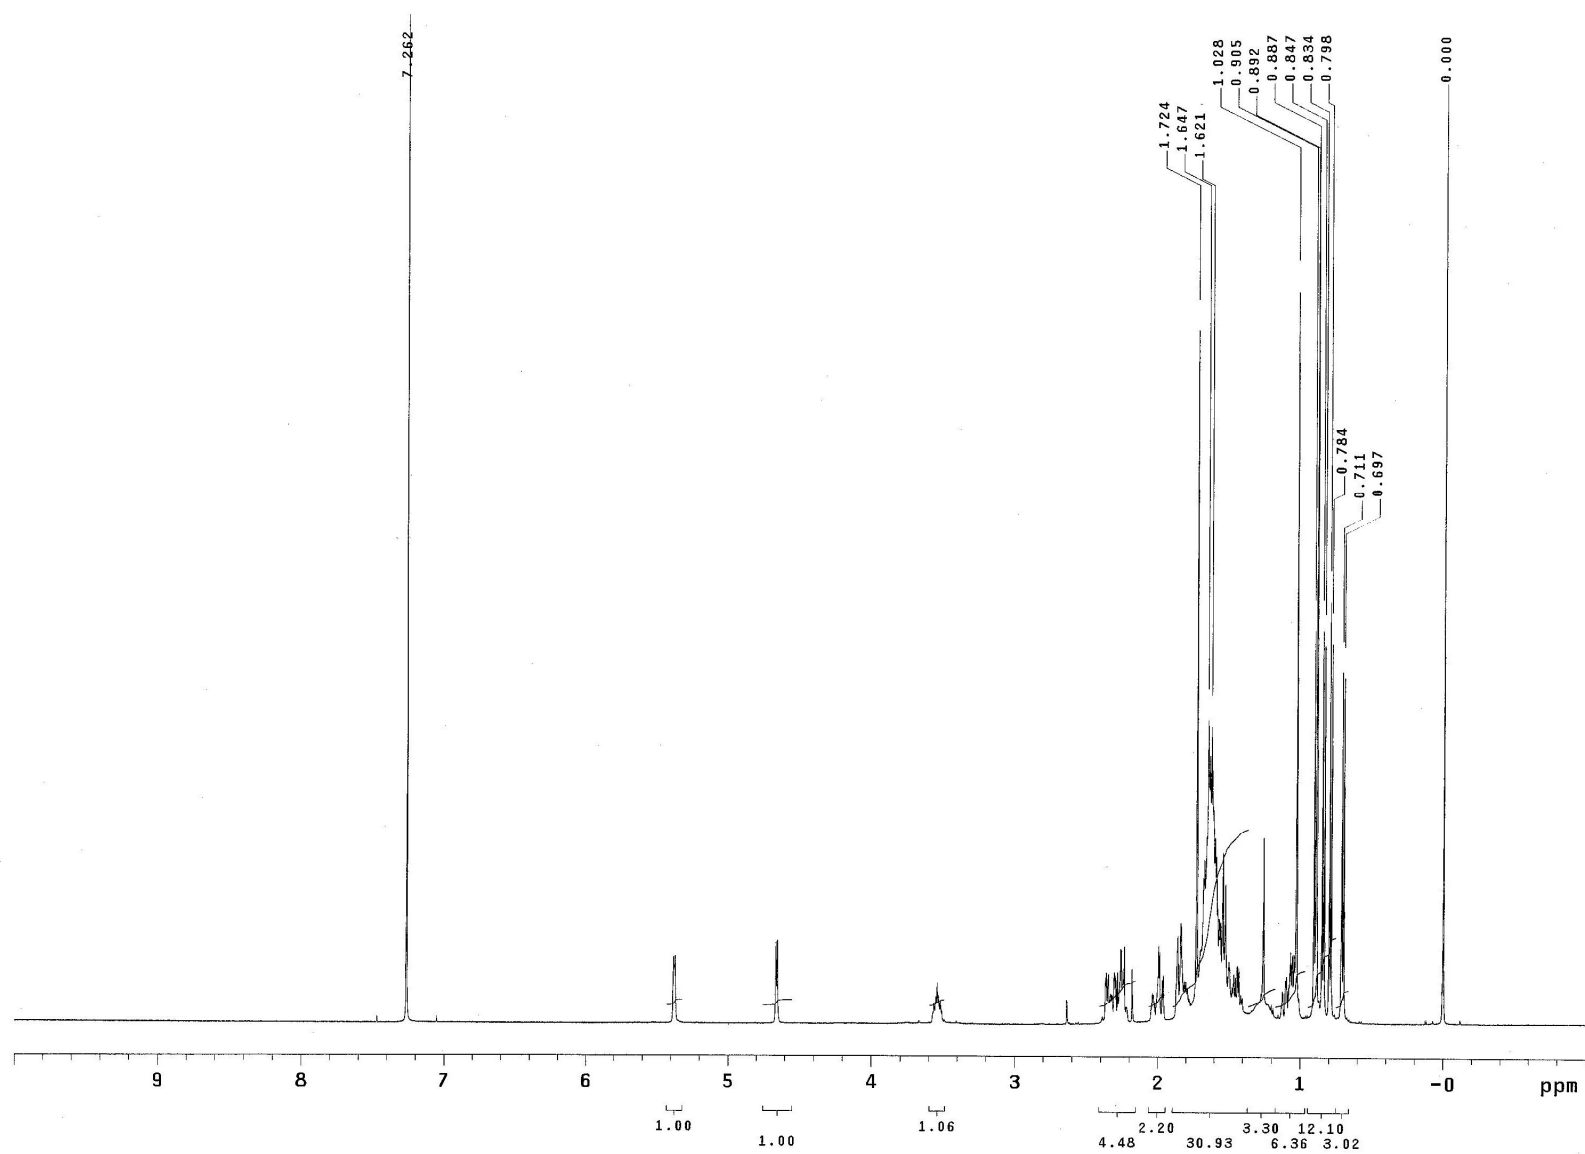

**Figure S2-1.** <sup>1</sup>H NMR spectrum (500 MHz) of compound **2** in CDCl<sub>3</sub>

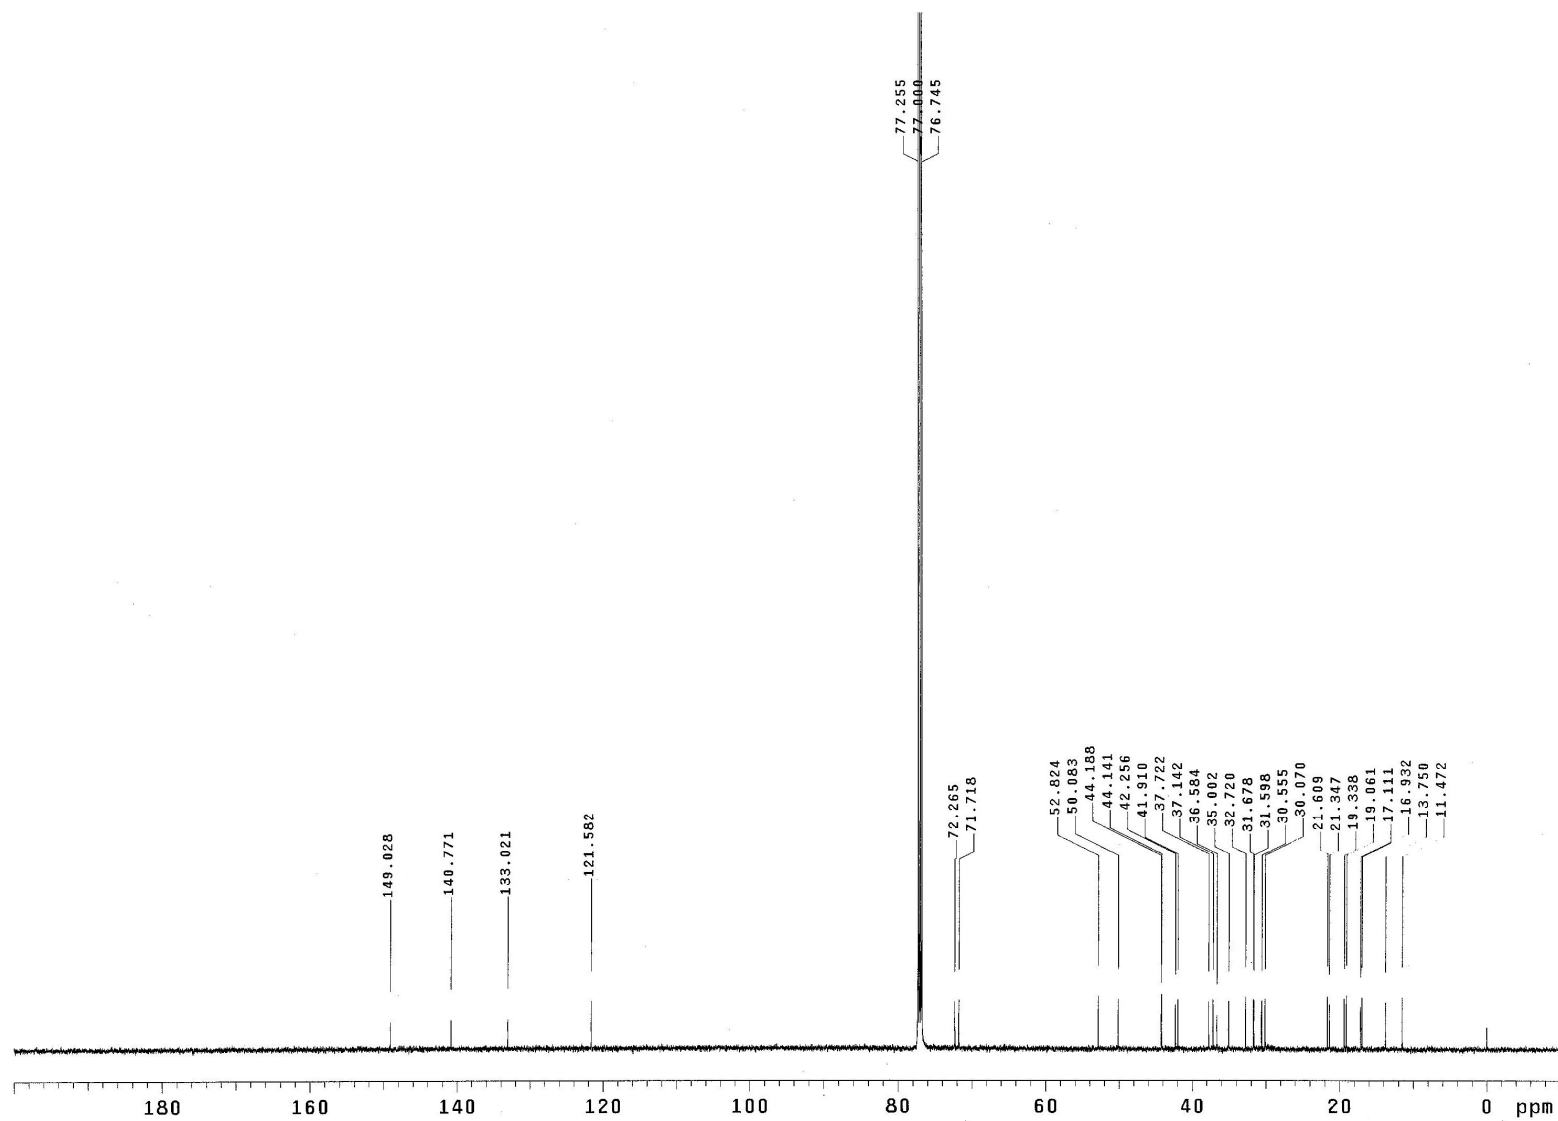

**Figure S2-2.** <sup>13</sup>C NMR spectrum (125 MHz) of compound **2** in CDCl<sub>3</sub>.

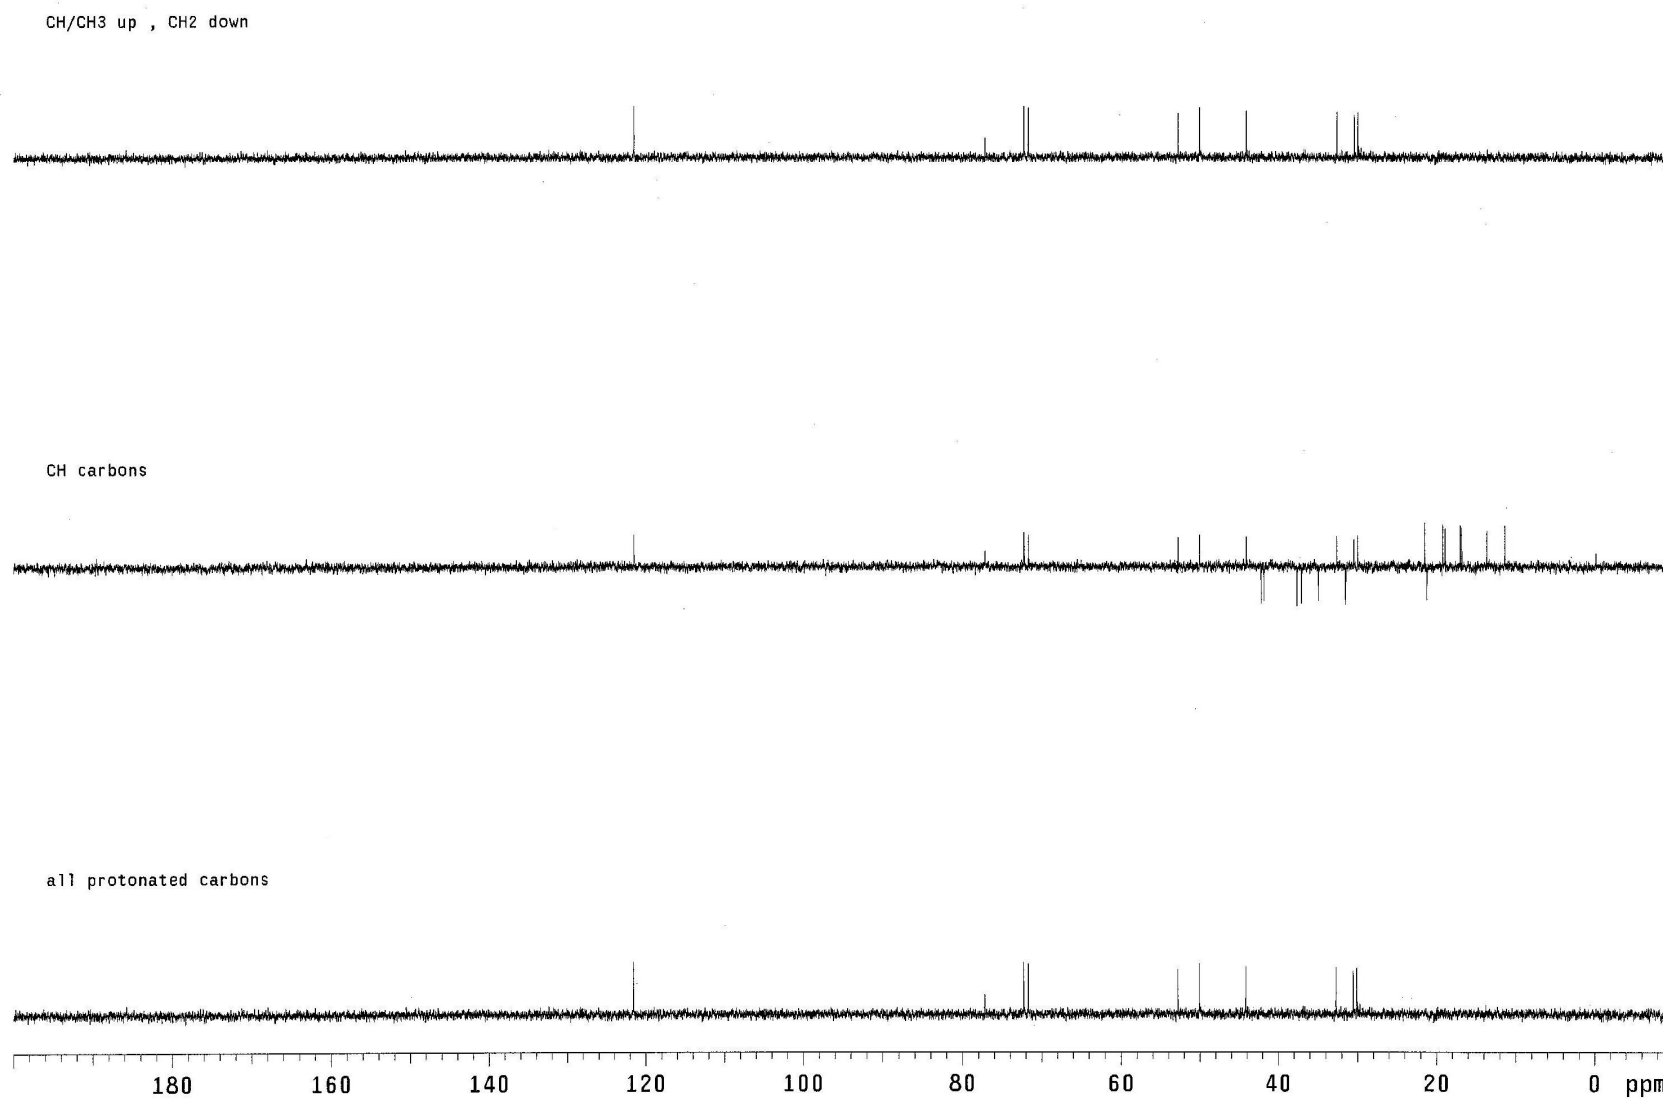

**Figure S2-3.** DEPT spectra (125 MHz) of compound **2** in CDCl<sub>3</sub>.



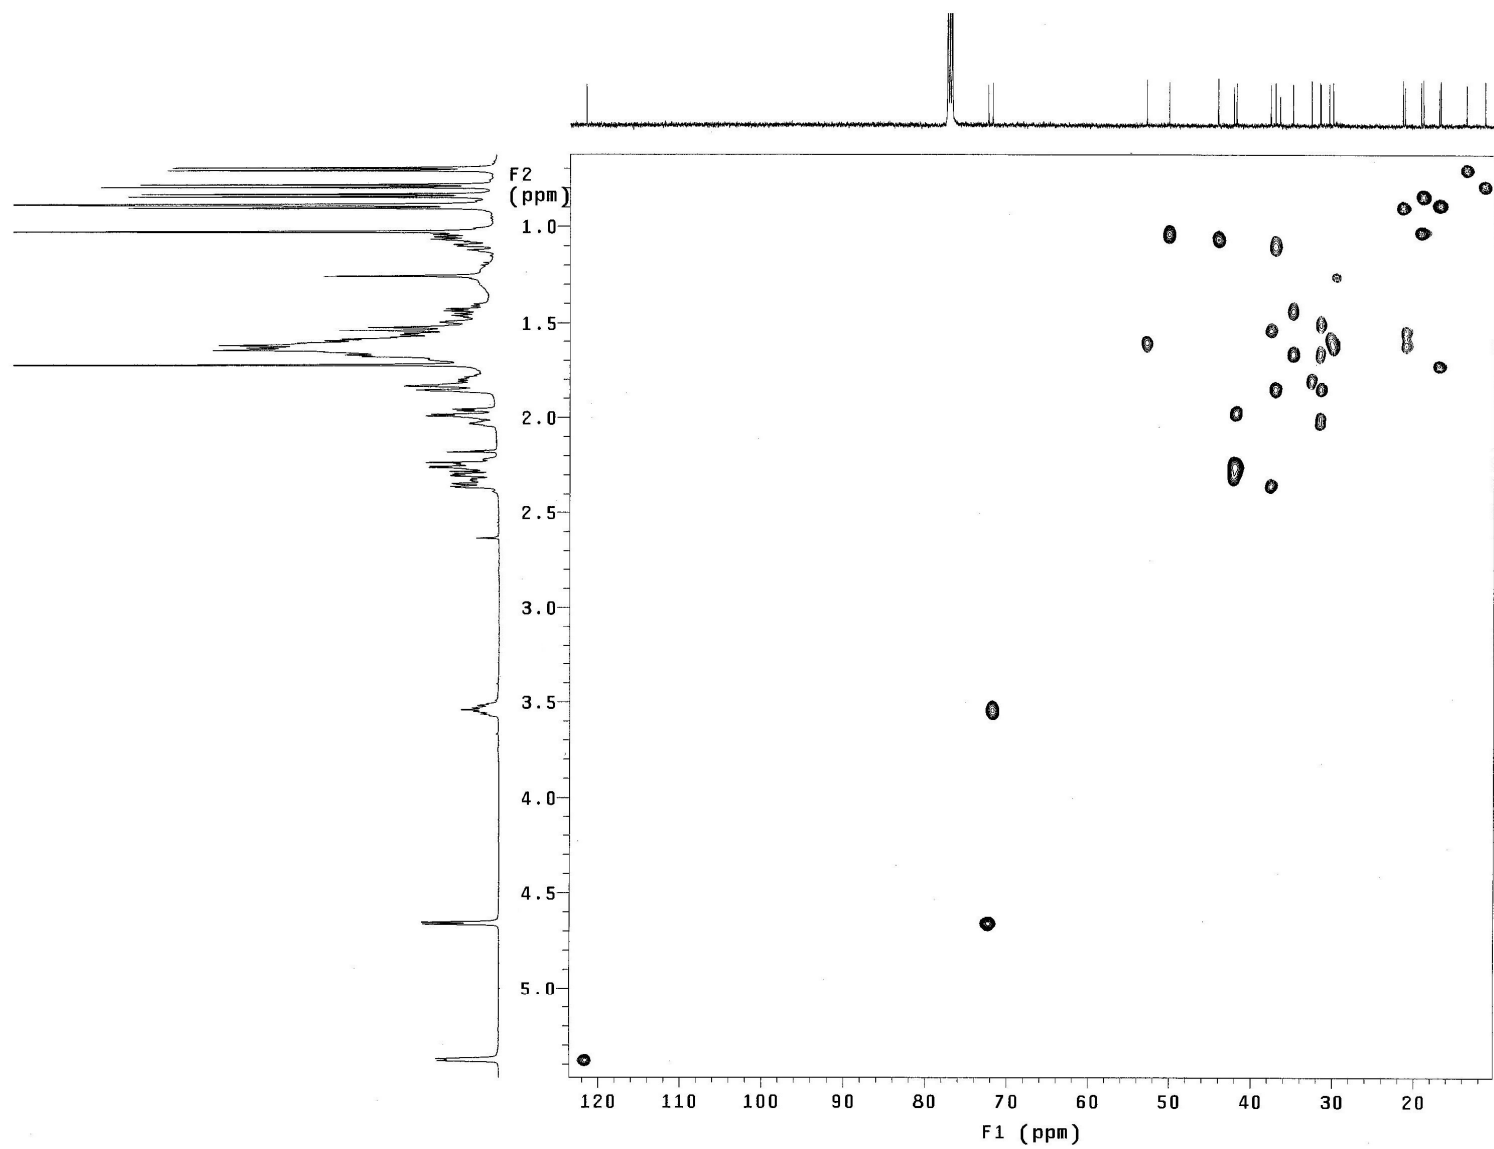

**Figure S2-4.** HMQC spectrum (500 MHz) of compound **2** in CDCl<sub>3</sub>.

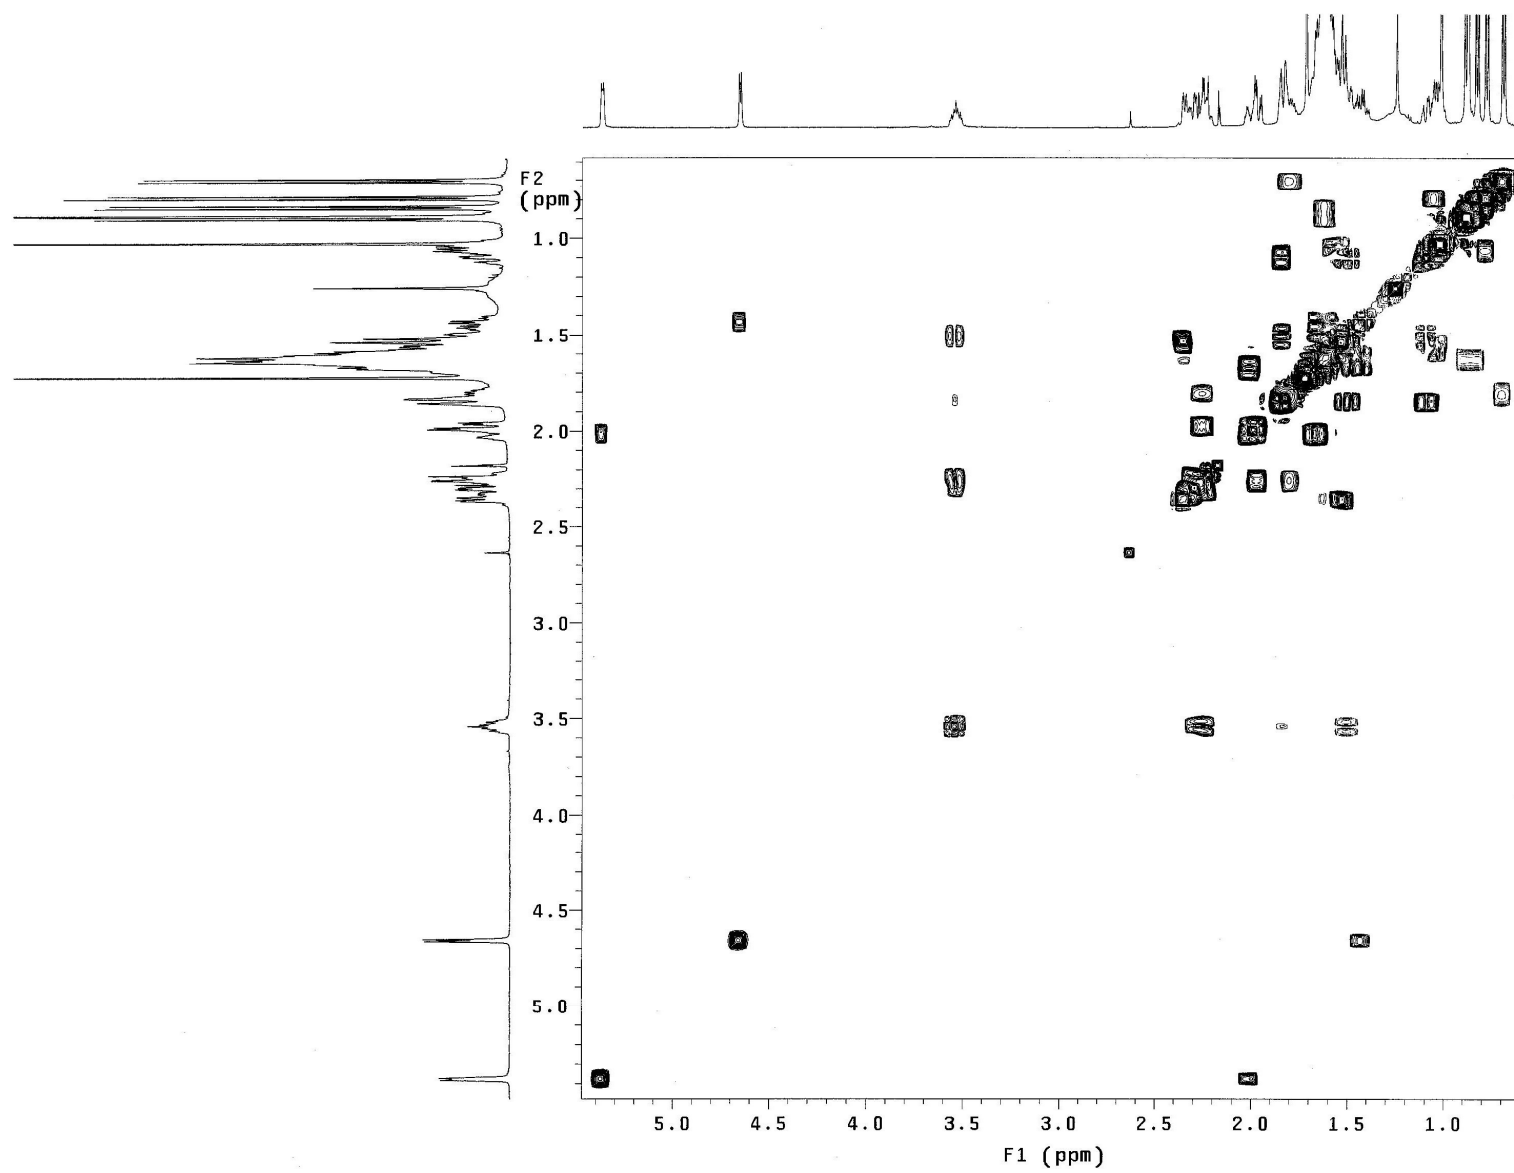

**Figure S2-5.** COSY spectrum (500 MHz) of compound **2** in CDCl<sub>3</sub>.

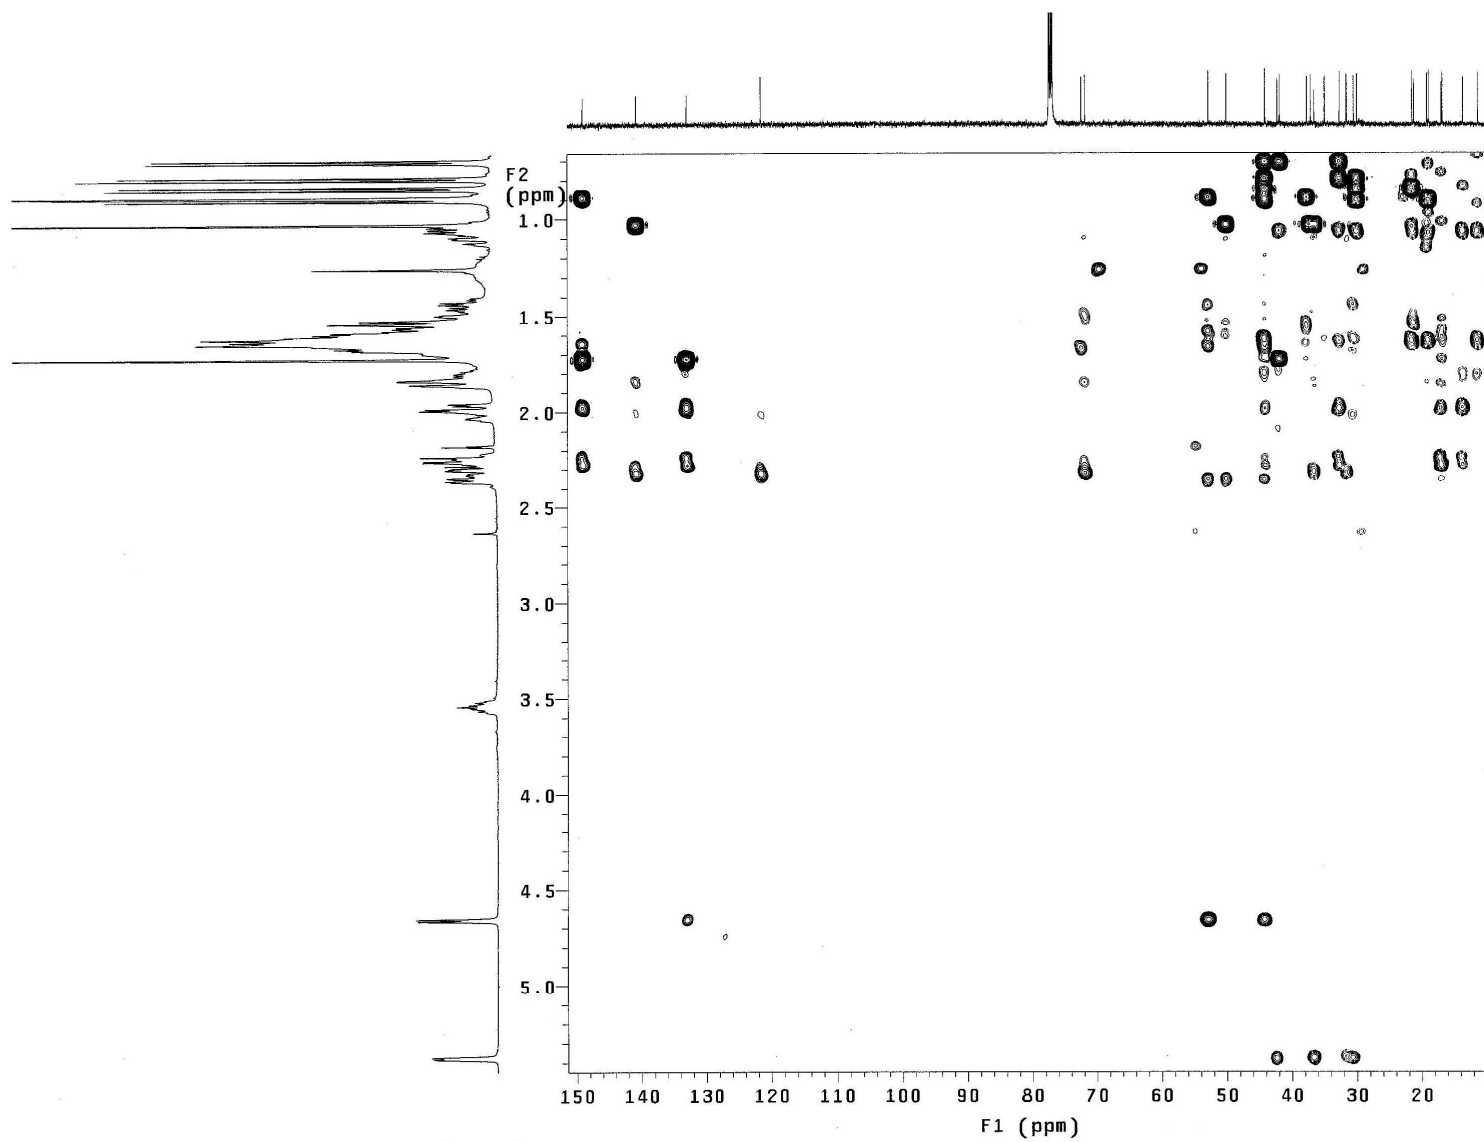

**Figure S2-6.** HMBC spectrum (500 MHz) of compound **2** in  $\text{CDCl}_3$ .

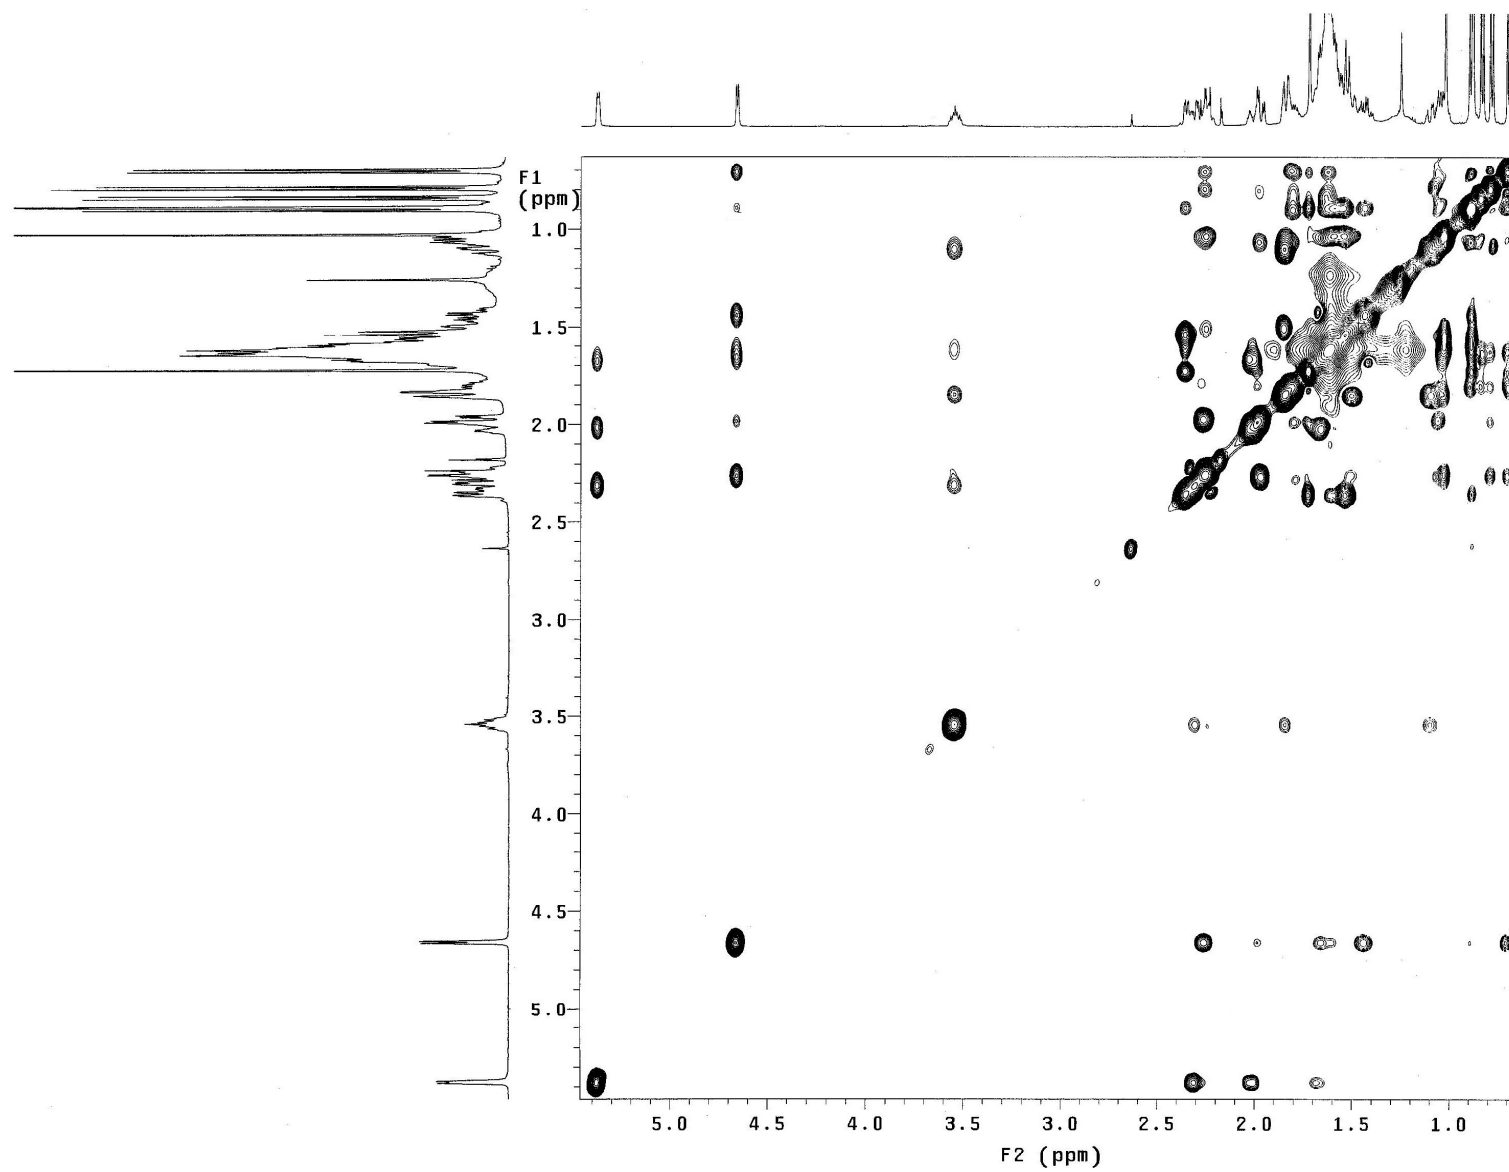

**Figure S2-7.** NOESY spectrum (500 MHz) of compound **2** in CDCl<sub>3</sub>.

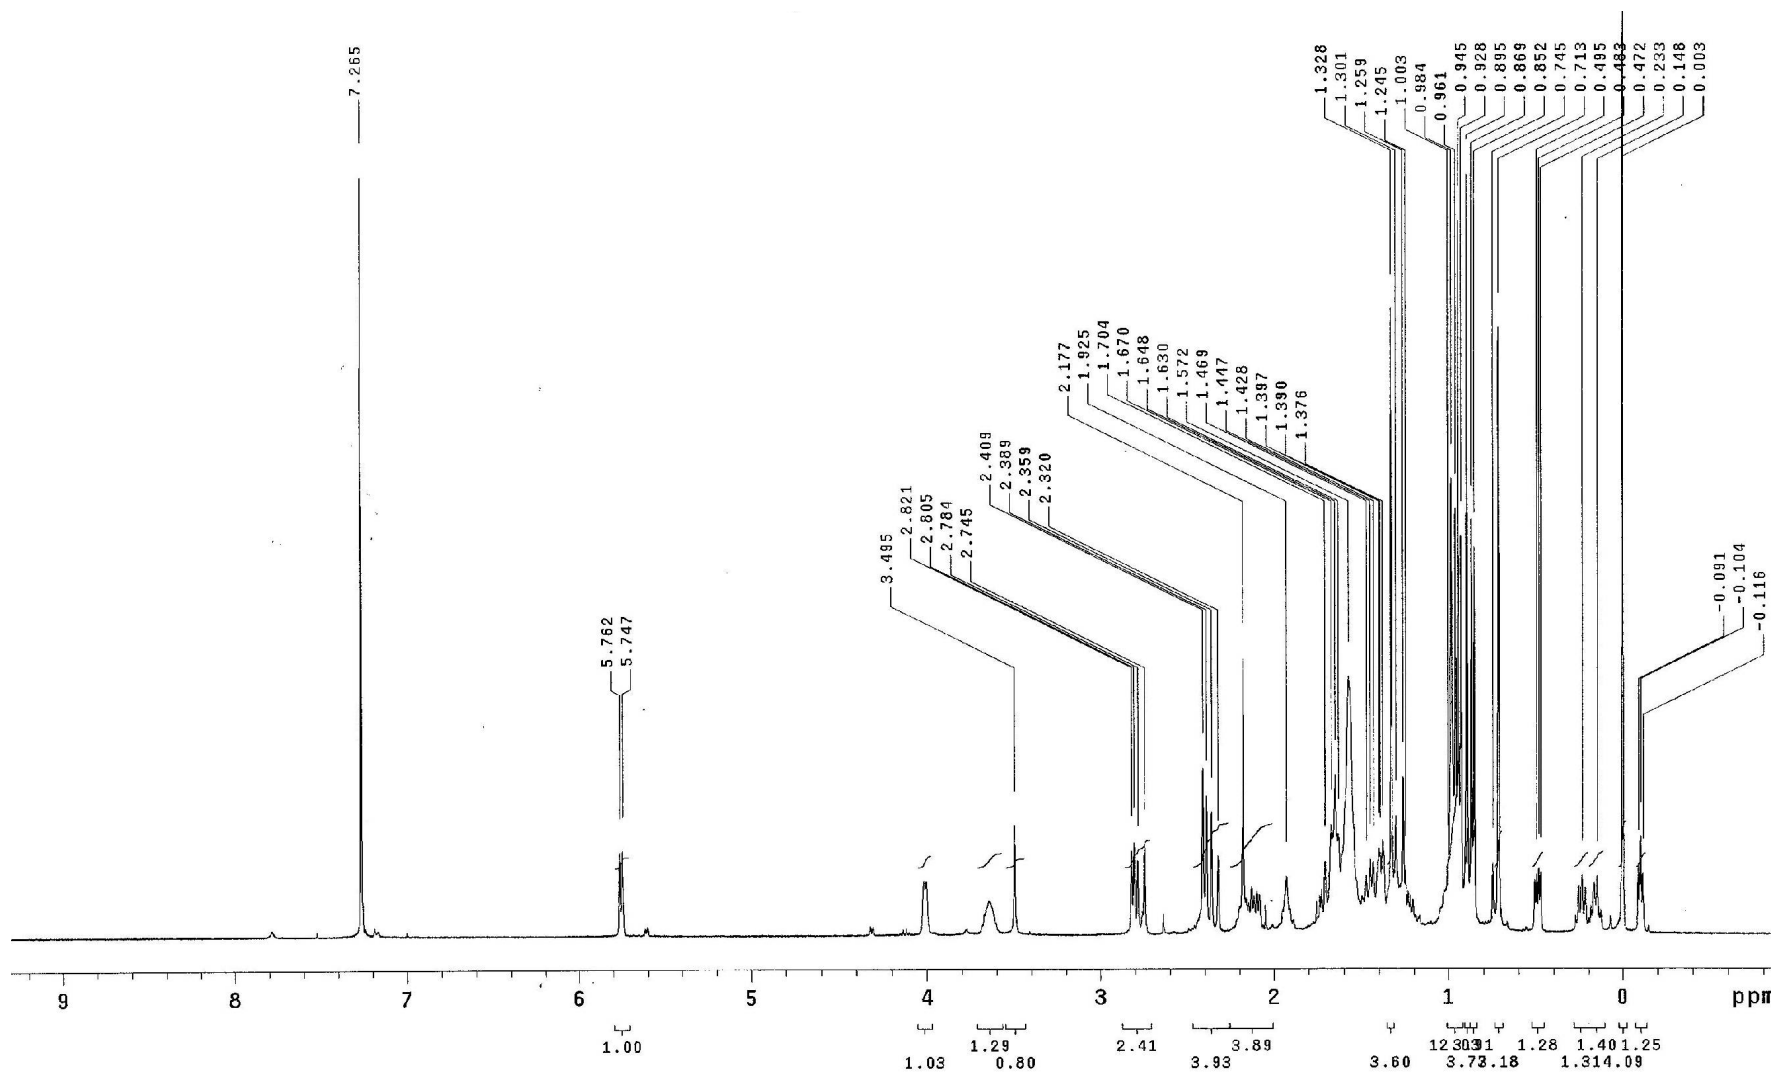

Figure S3-1.  $^1\text{H}$  NMR spectrum (400 MHz) of compound **3** in  $\text{CDCl}_3$ .

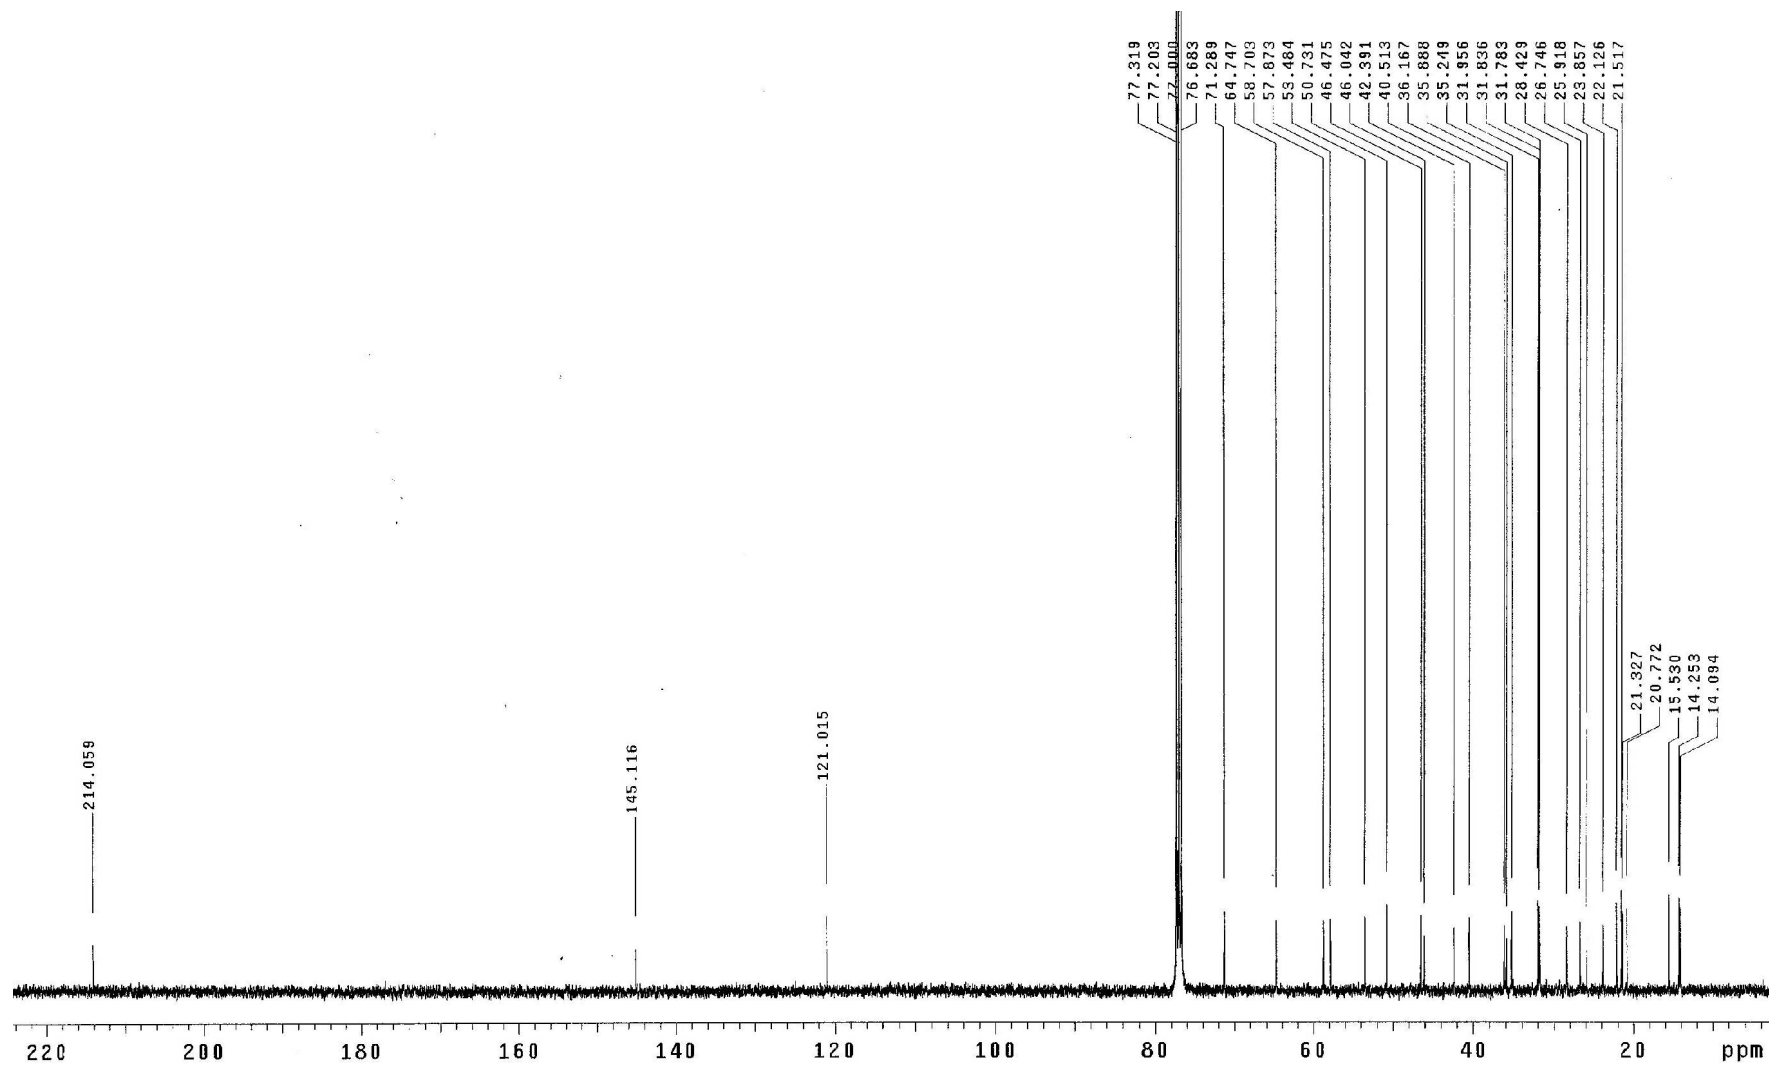

Figure S3-2. <sup>13</sup>C NMR spectrum (100 MHz) of compound **3** in CDCl<sub>3</sub>.

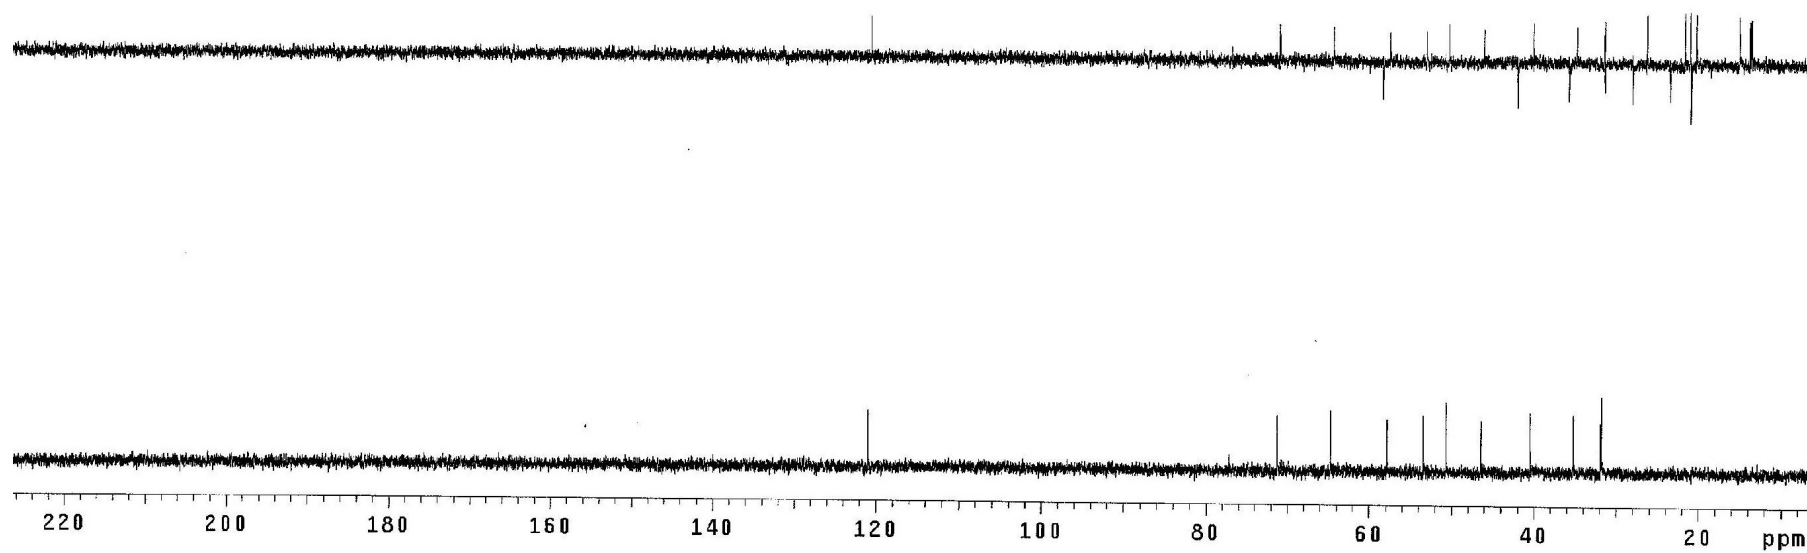

**Figure S3-3.** DEPT spectra (100 MHz) of compound **3** in  $\text{CDCl}_3$ .

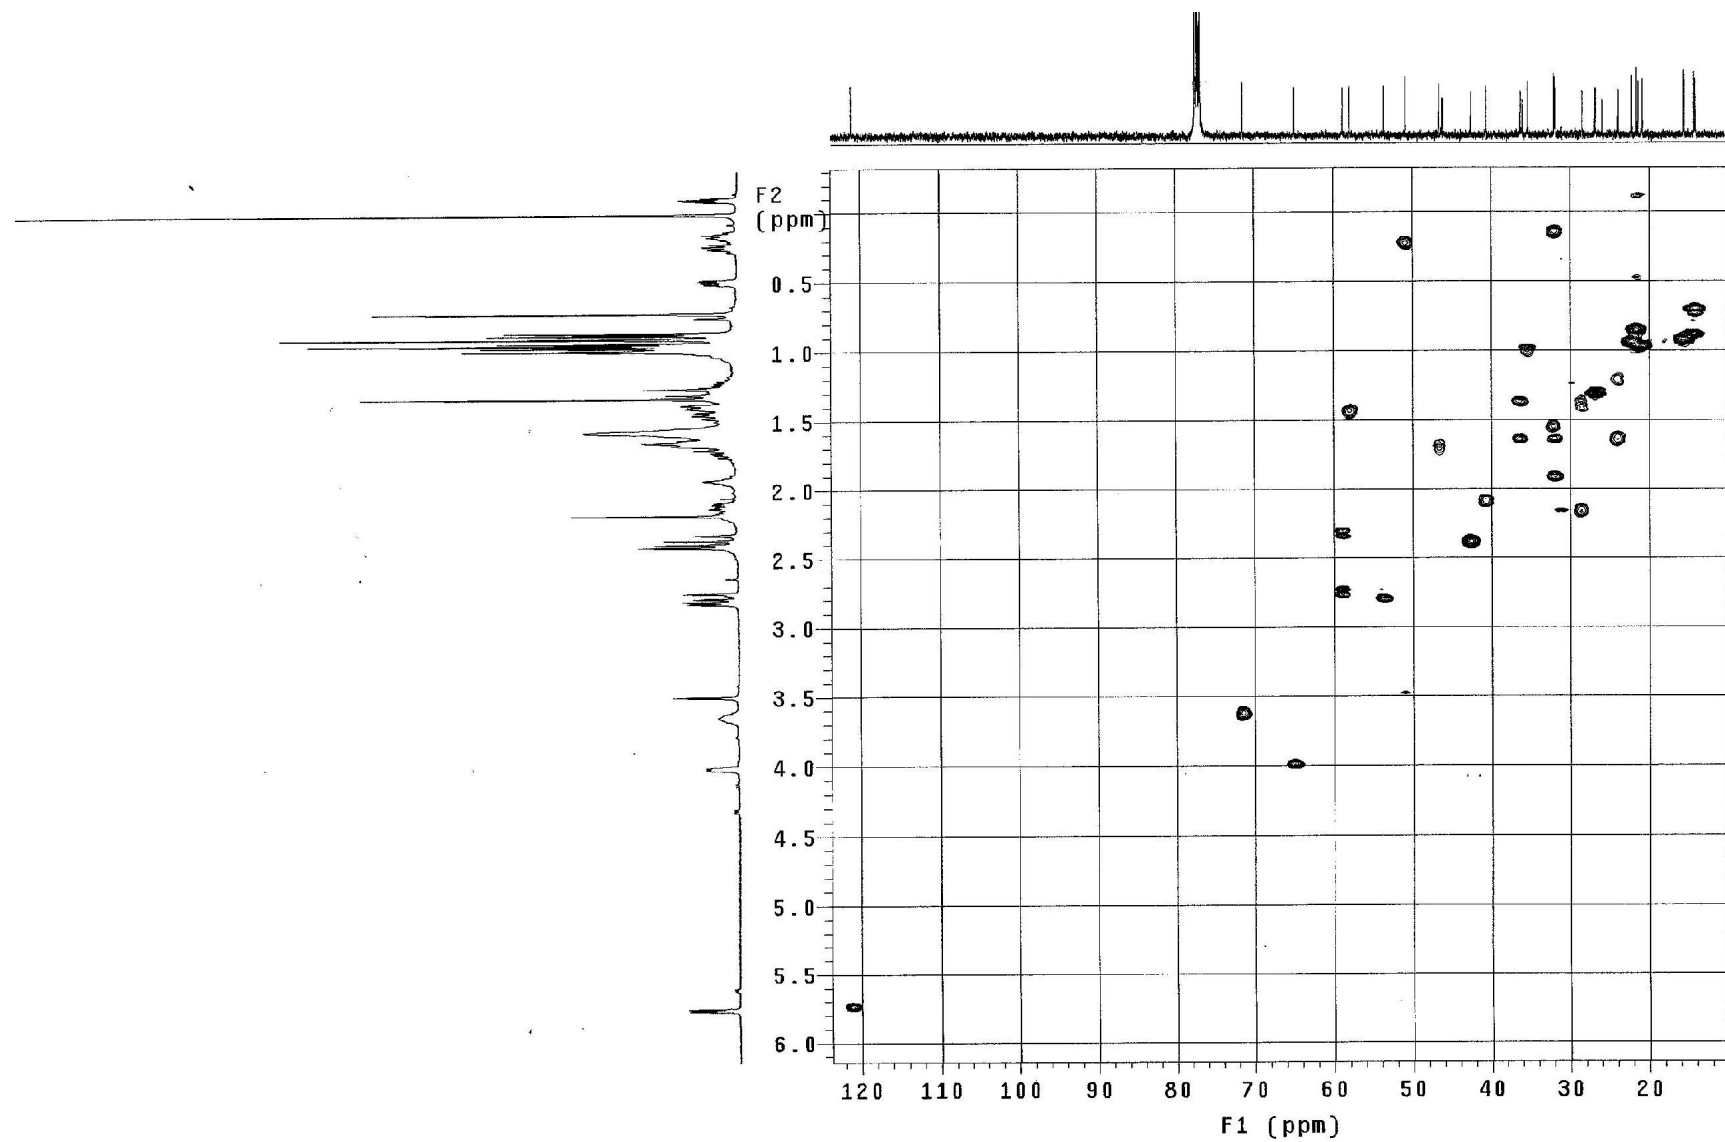

**Figure S3-4.** HMQC spectrum (400 MHz) of compound **3** in CDCl<sub>3</sub>.



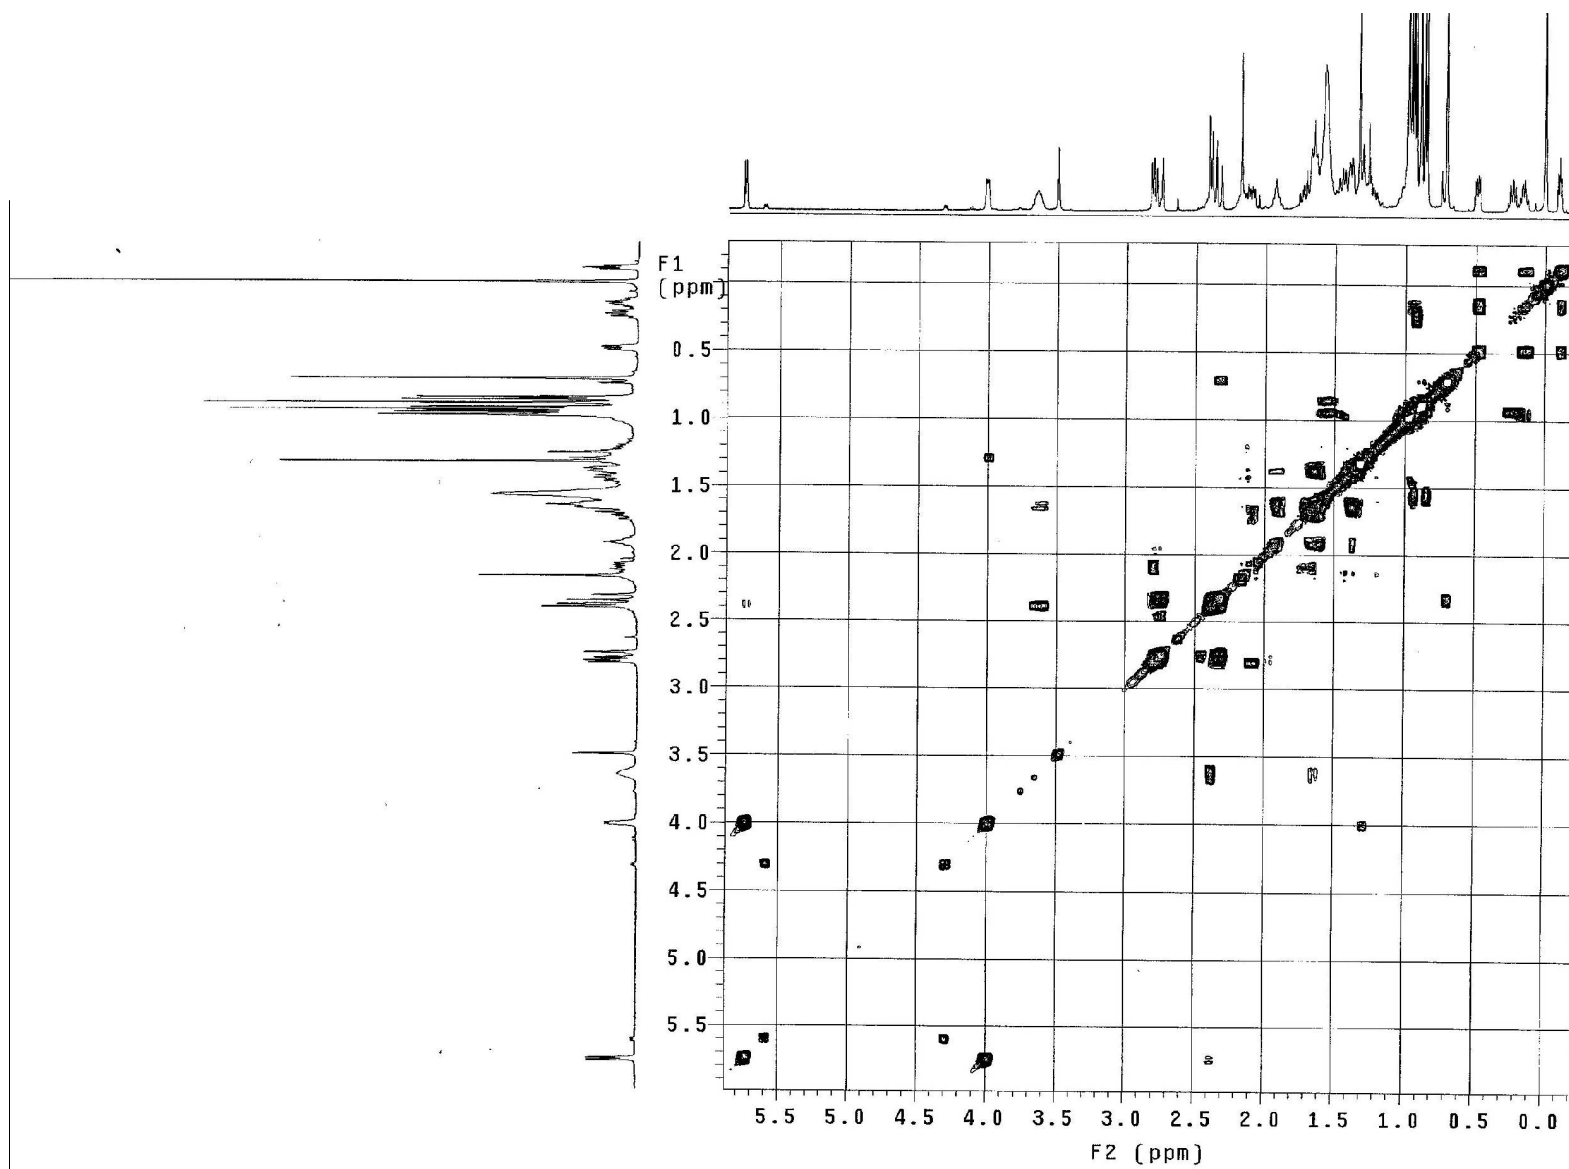

**Figure S3-5.** COSY spectrum (400 MHz) of compound **3** in  $\text{CDCl}_3$ .

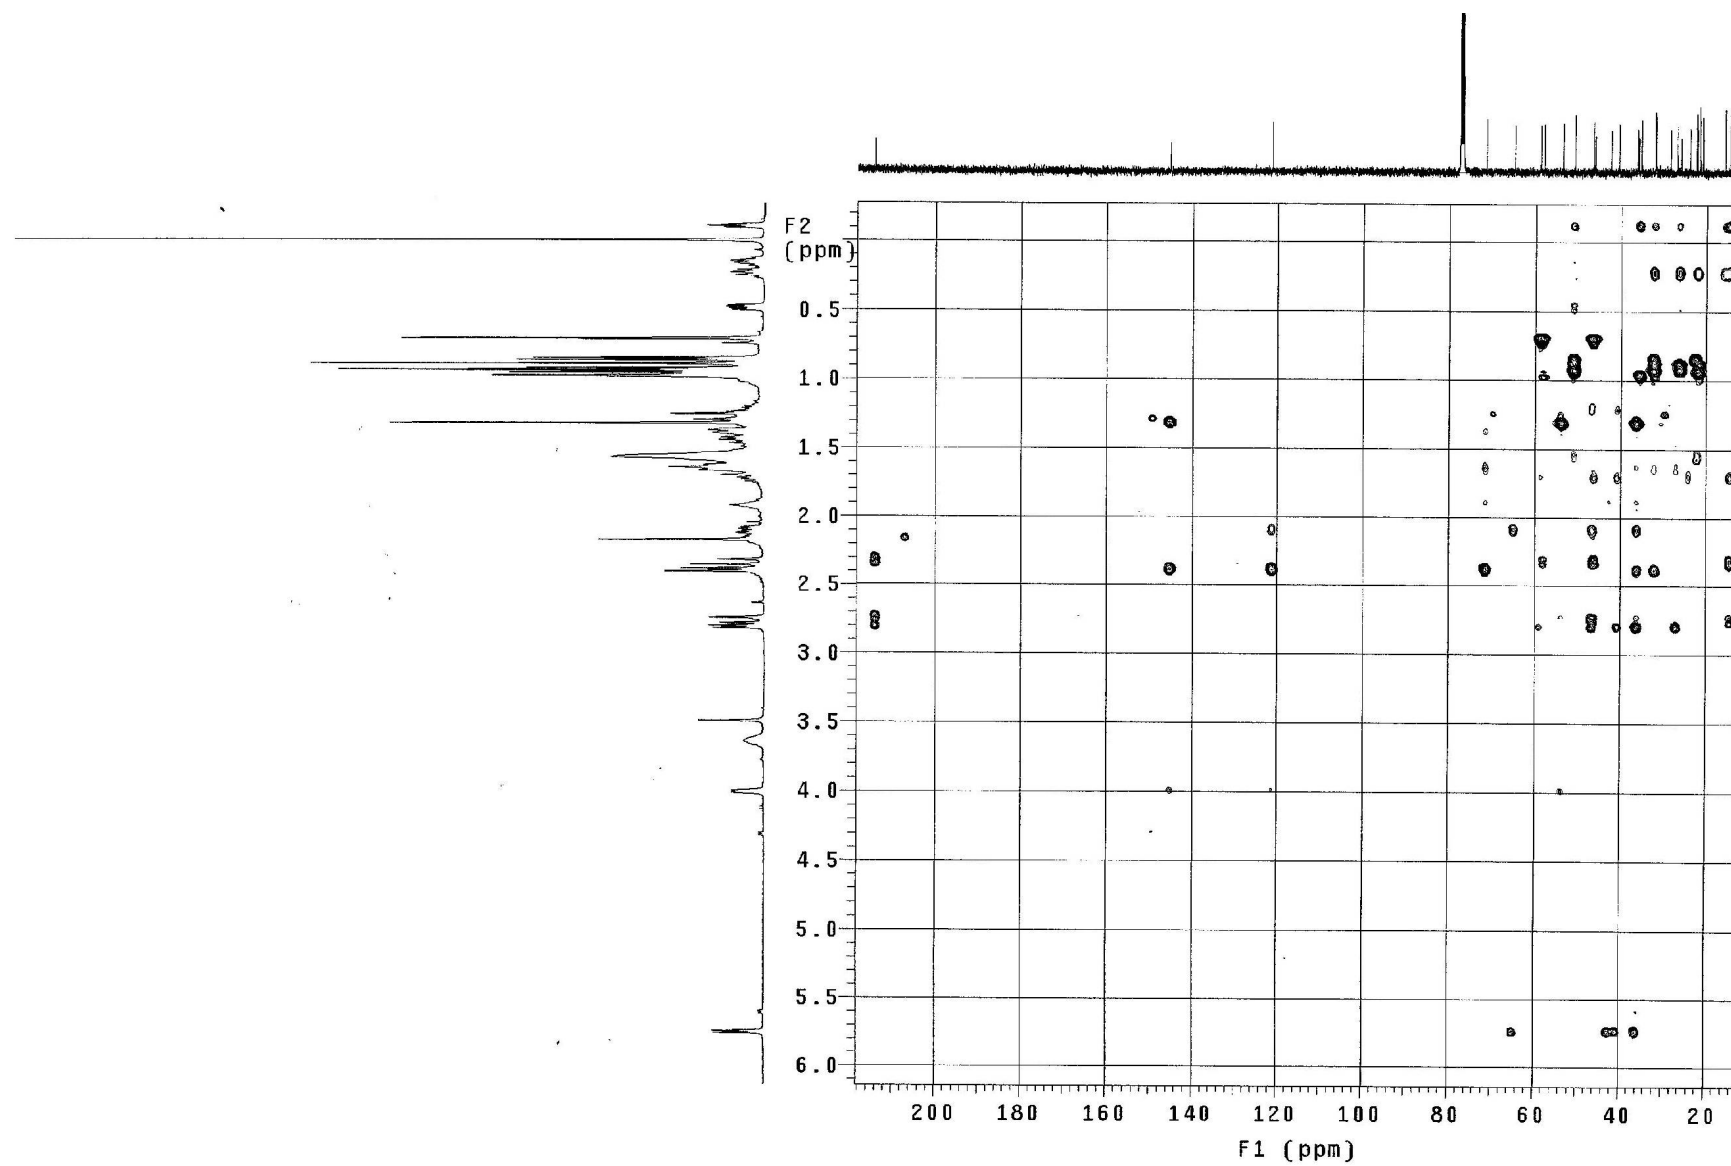

**Figure S3-6.** HMBC spectrum (400 MHz) of compound **3** in CDCl<sub>3</sub>.

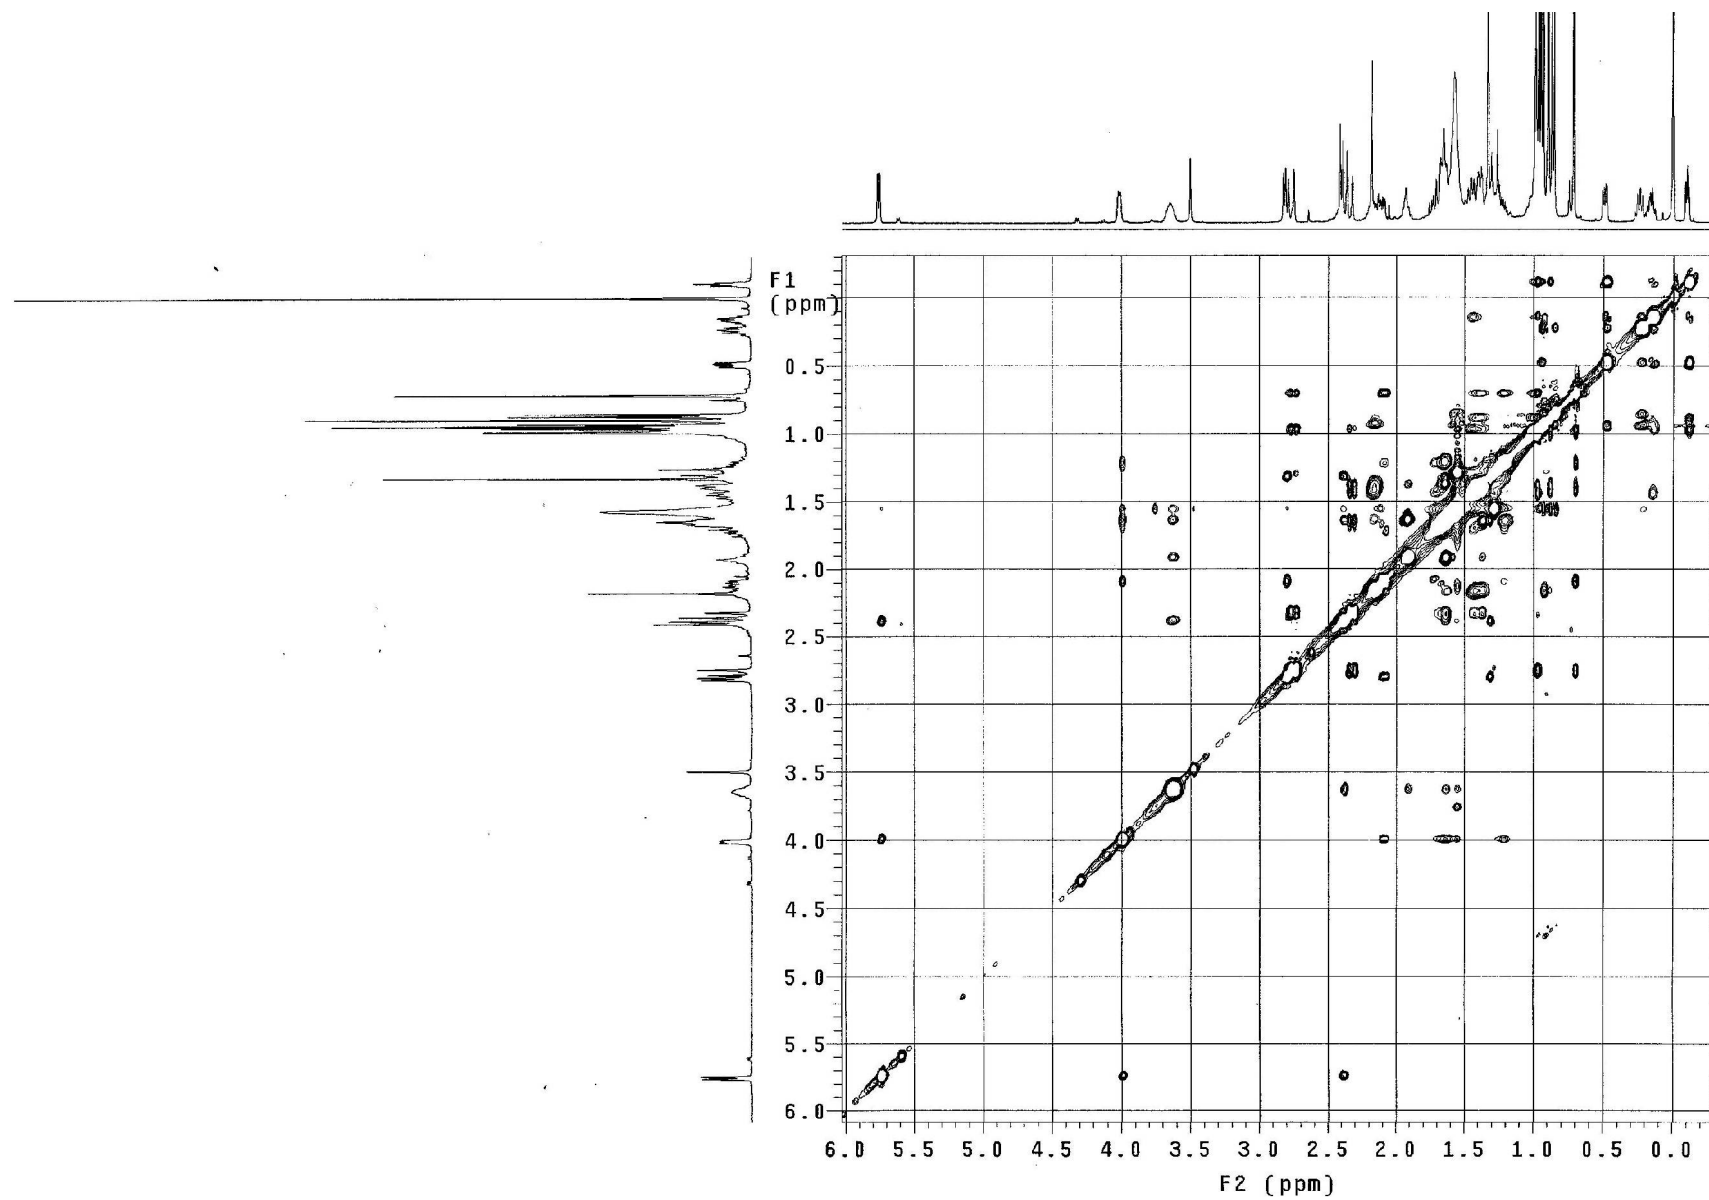

**Figure S3-7.** NOESY spectrum (400 MHz) of compound **3** in  $\text{CDCl}_3$ .

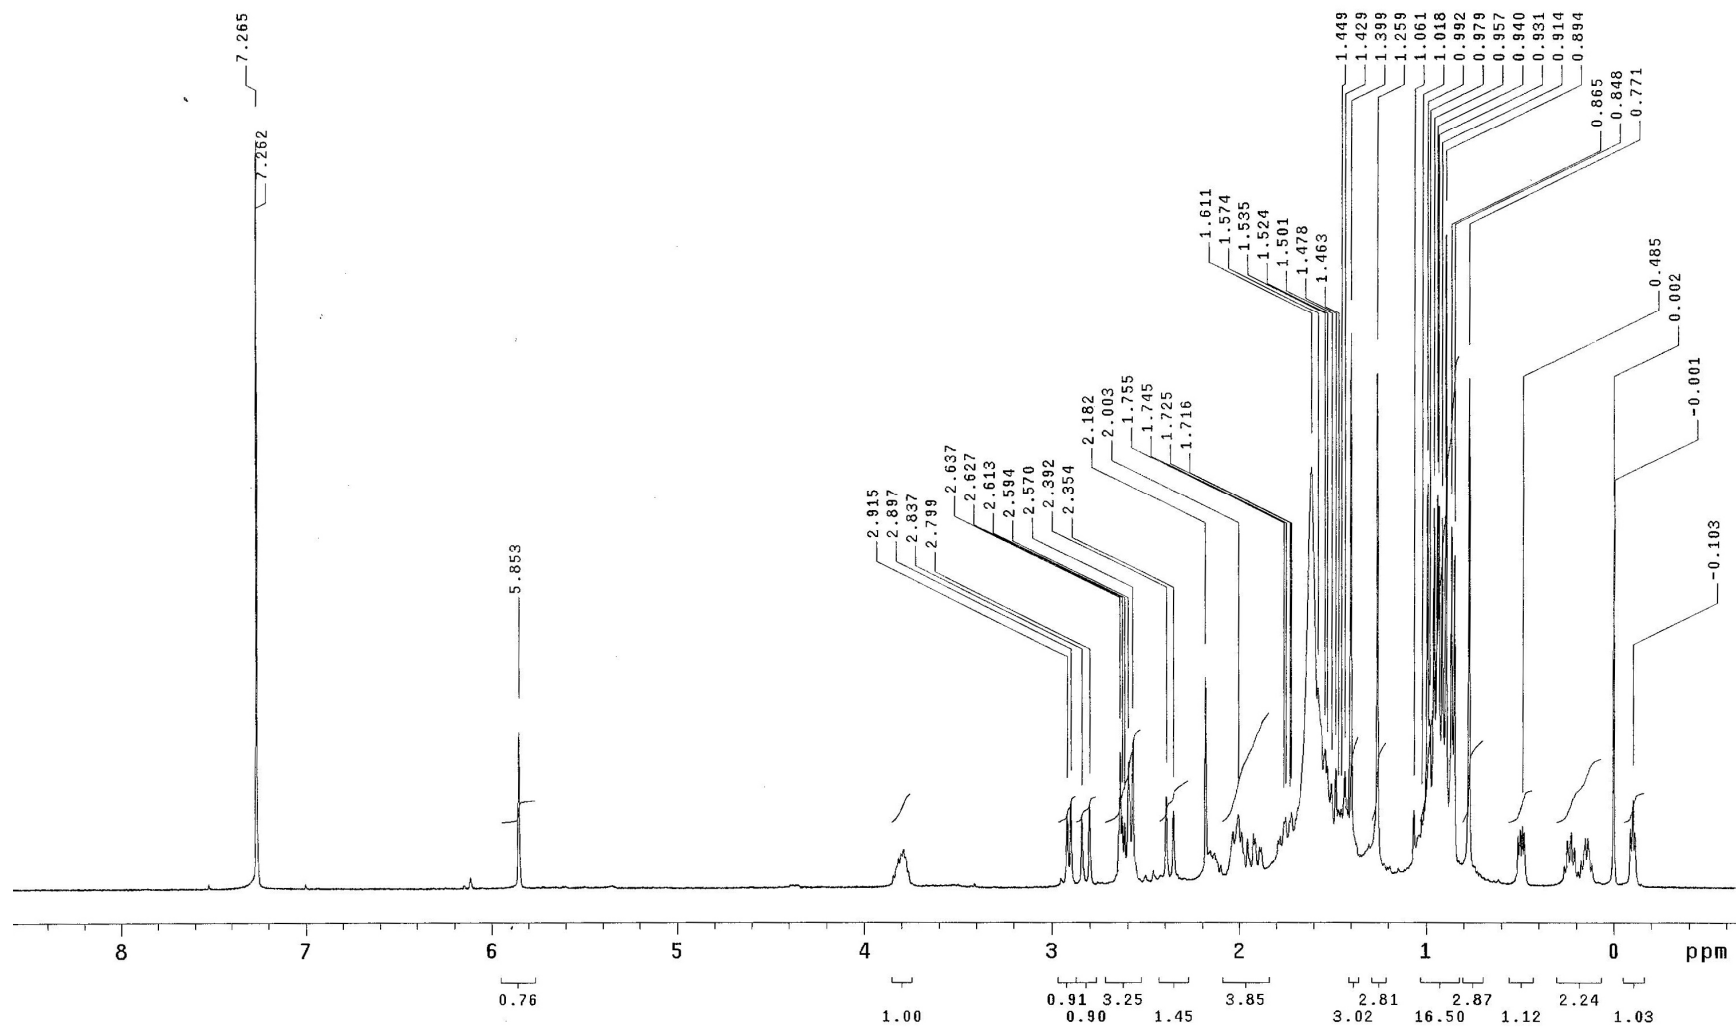

**Figure S4-1.** <sup>1</sup>H NMR spectrum (400 MHz) of compound 4 in CDCl<sub>3</sub>.

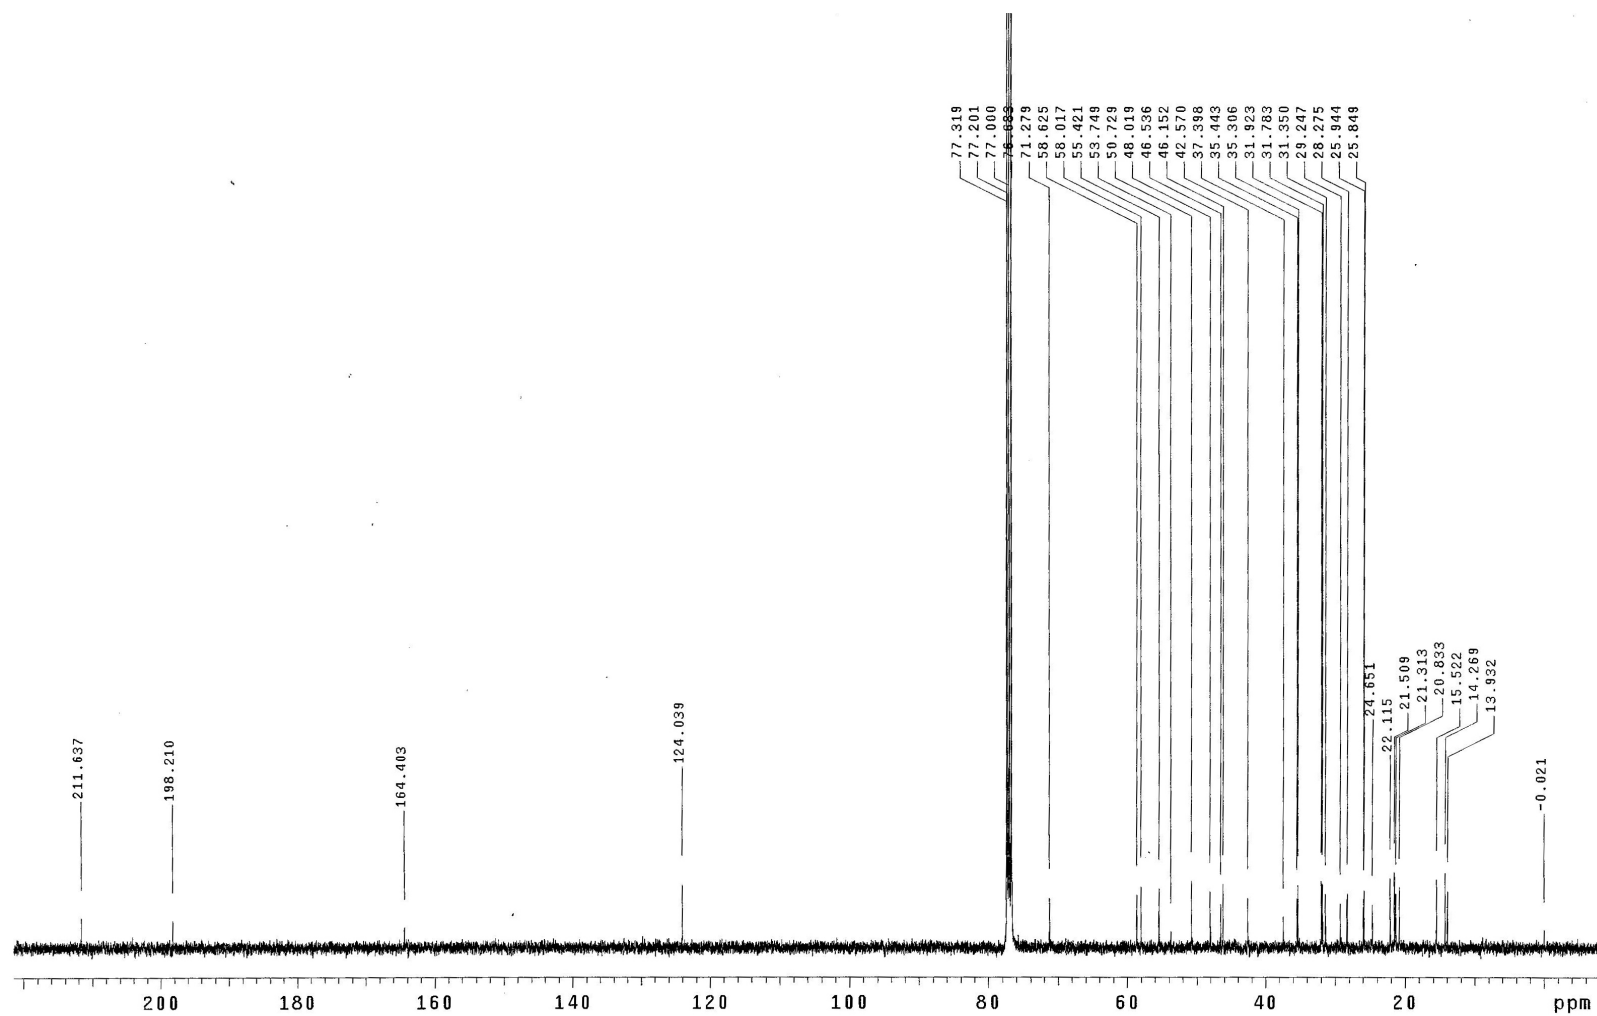

**Figure S4-2.** <sup>13</sup>C NMR spectrum (100 MHz) of compound 4 in CDCl<sub>3</sub>.

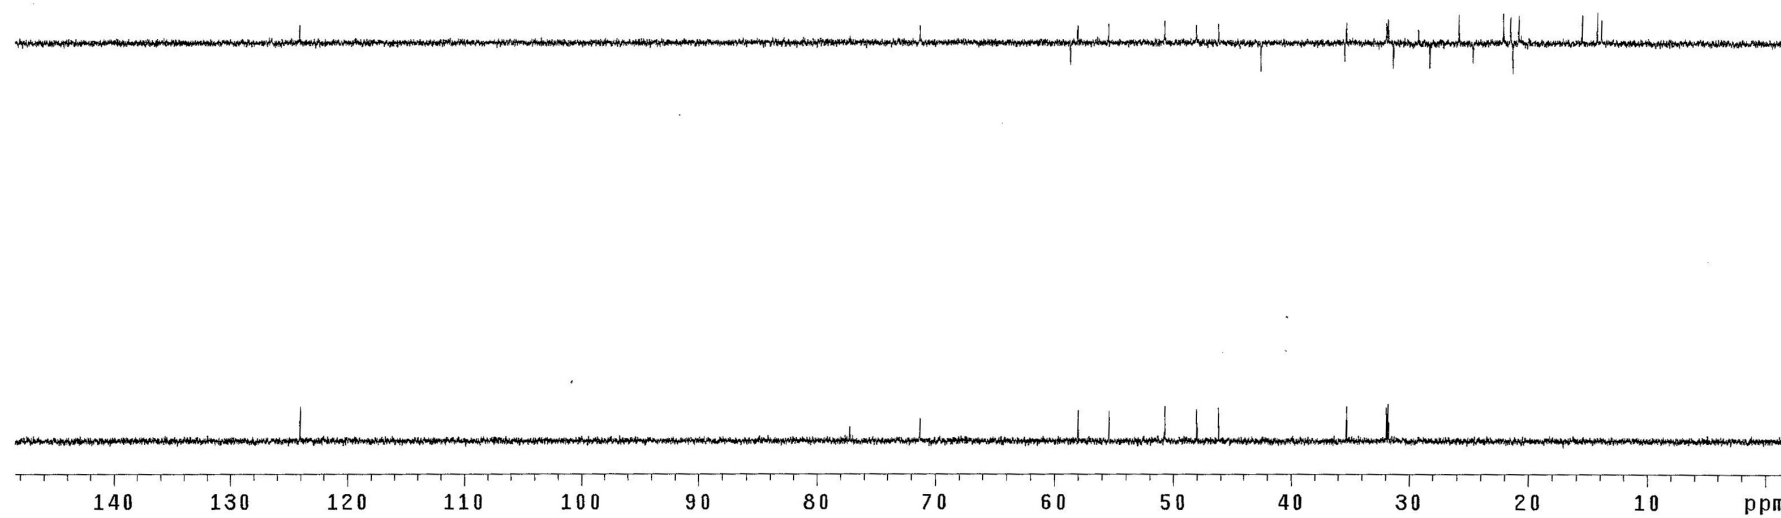

**Figure S4-3.** DEPT spectra (100 MHz) of compound **4** in CDCl<sub>3</sub>.

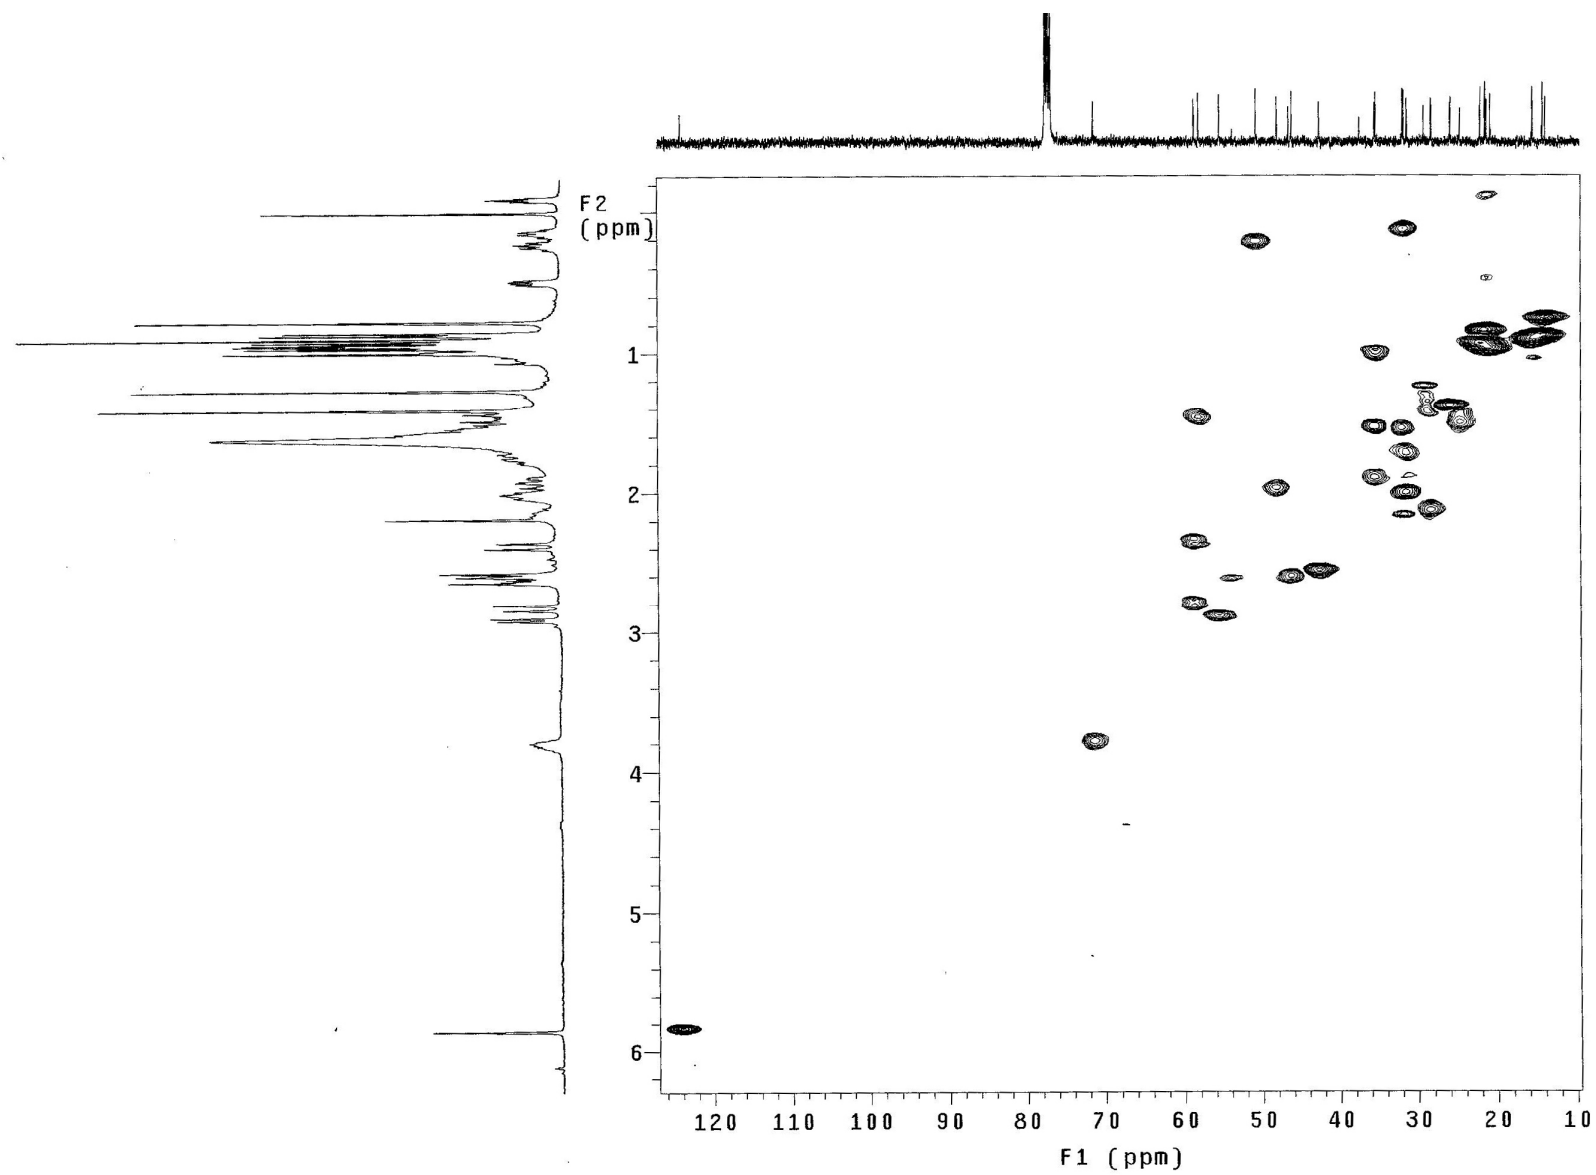

**Figure S4-4.** HMQC spectrum (400 MHz) of compound **4** in  $\text{CDCl}_3$ .

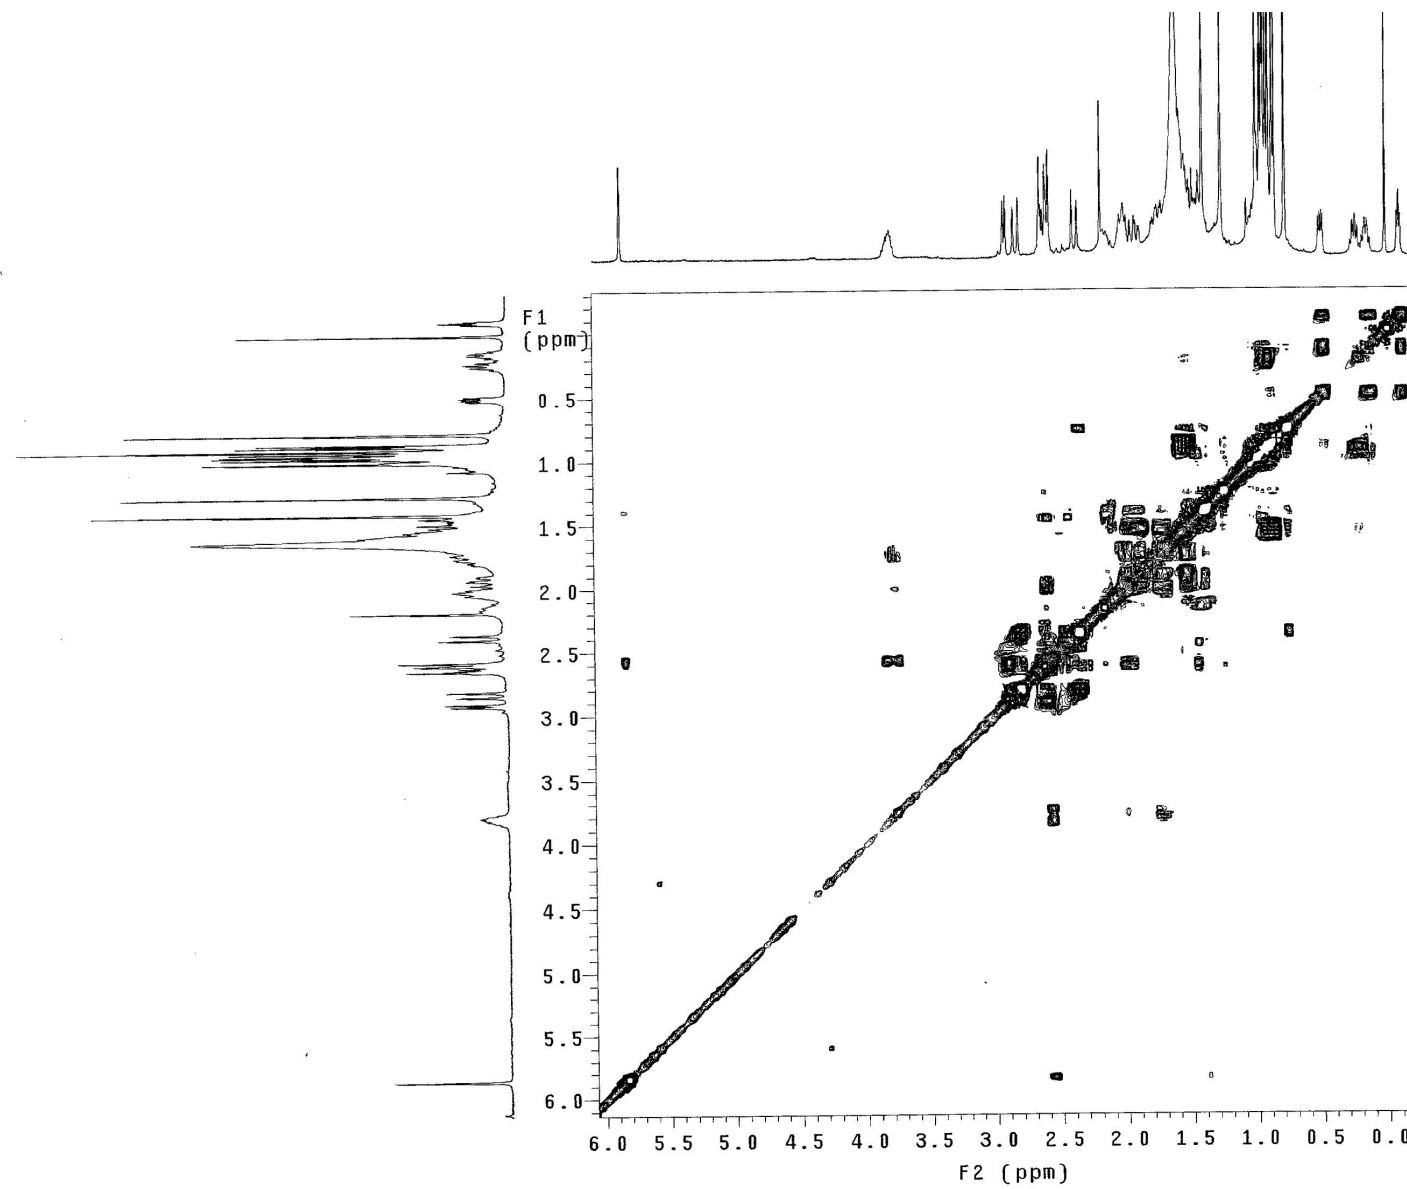

**Figure S4-5.** COSY spectrum (400 MHz) of compound **4** in  $\text{CDCl}_3$ .



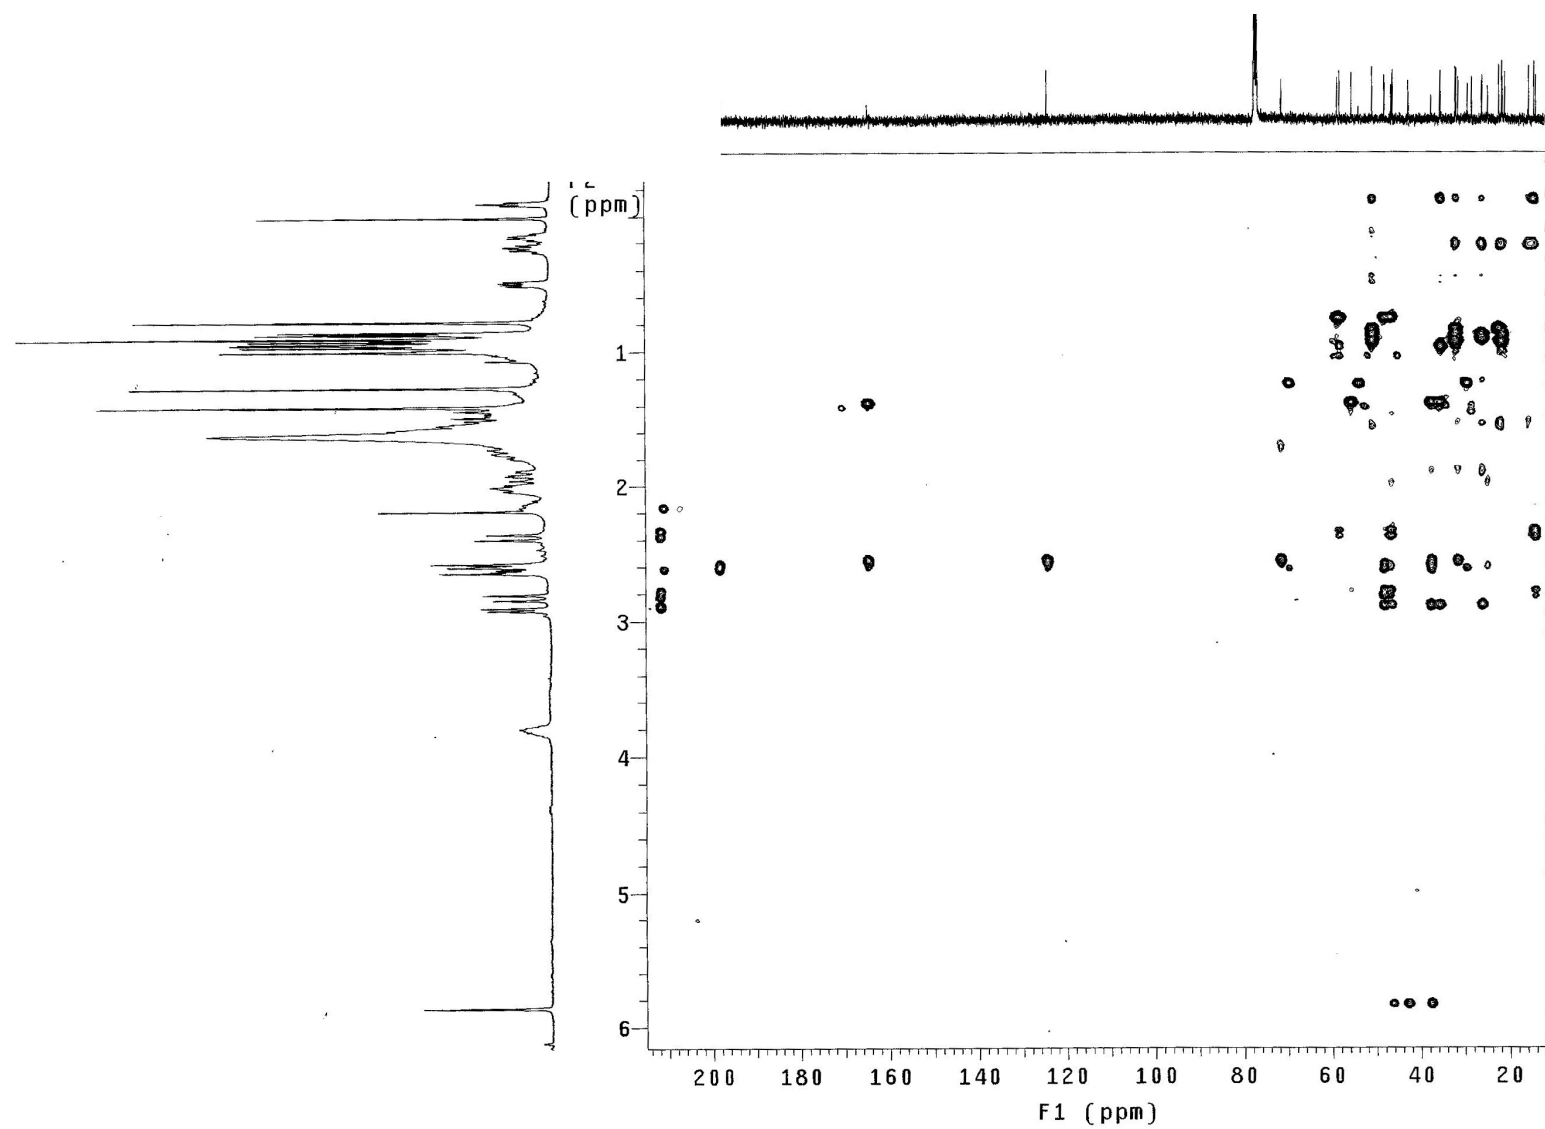

**Figure S4-6.** HMBC spectrum (400 MHz) of compound **4** in CDCl<sub>3</sub>.

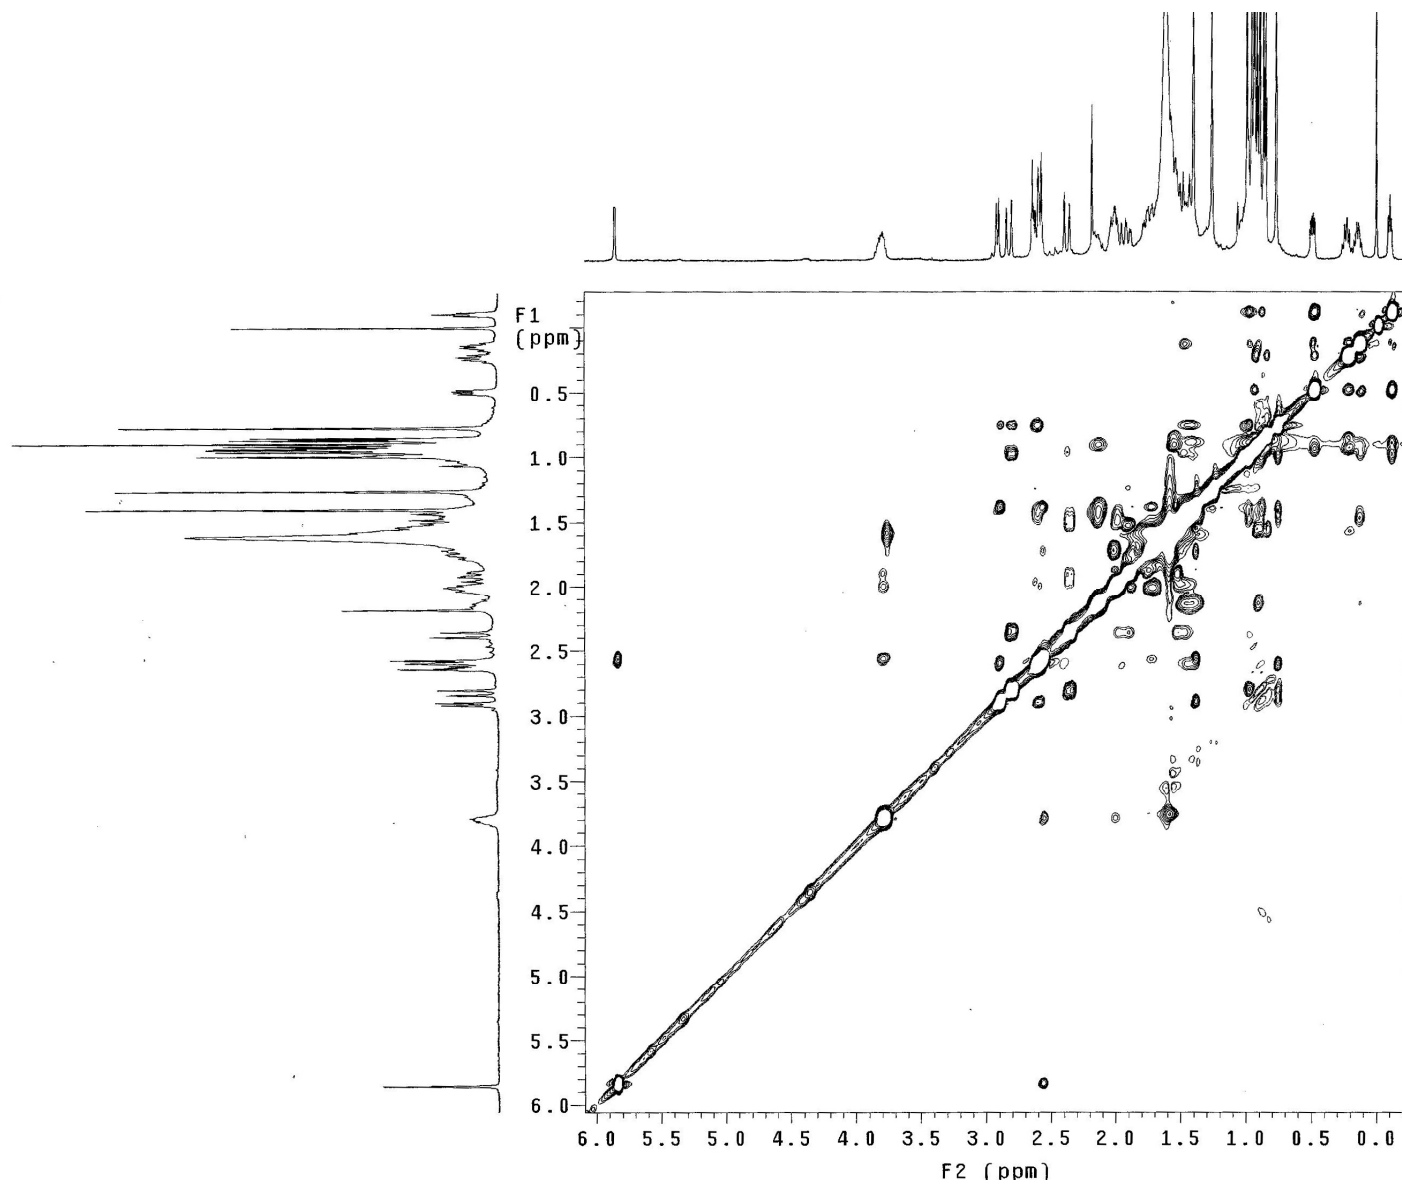

**Figure S4-7.** NOESY spectrum (400 MHz) of compound **4** in CDCl<sub>3</sub>.

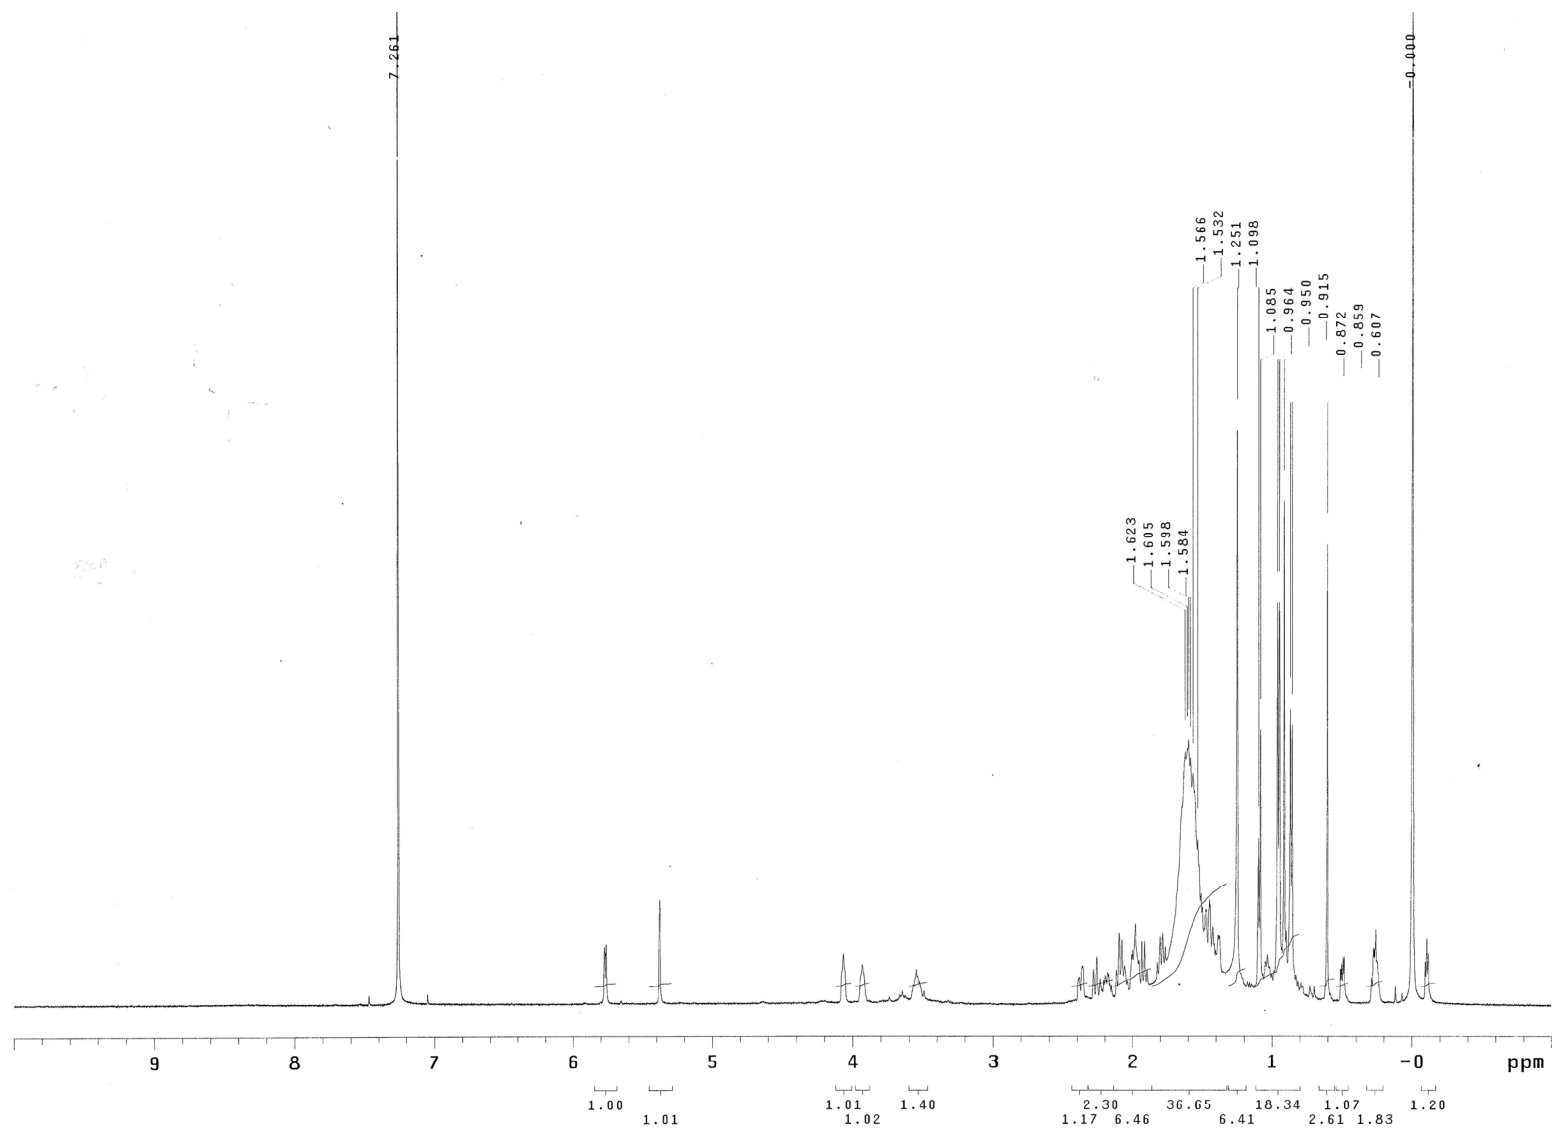

**Figure S5-1.** <sup>1</sup>H NMR spectrum (500 MHz) of compound **5** in CDCl<sub>3</sub>.

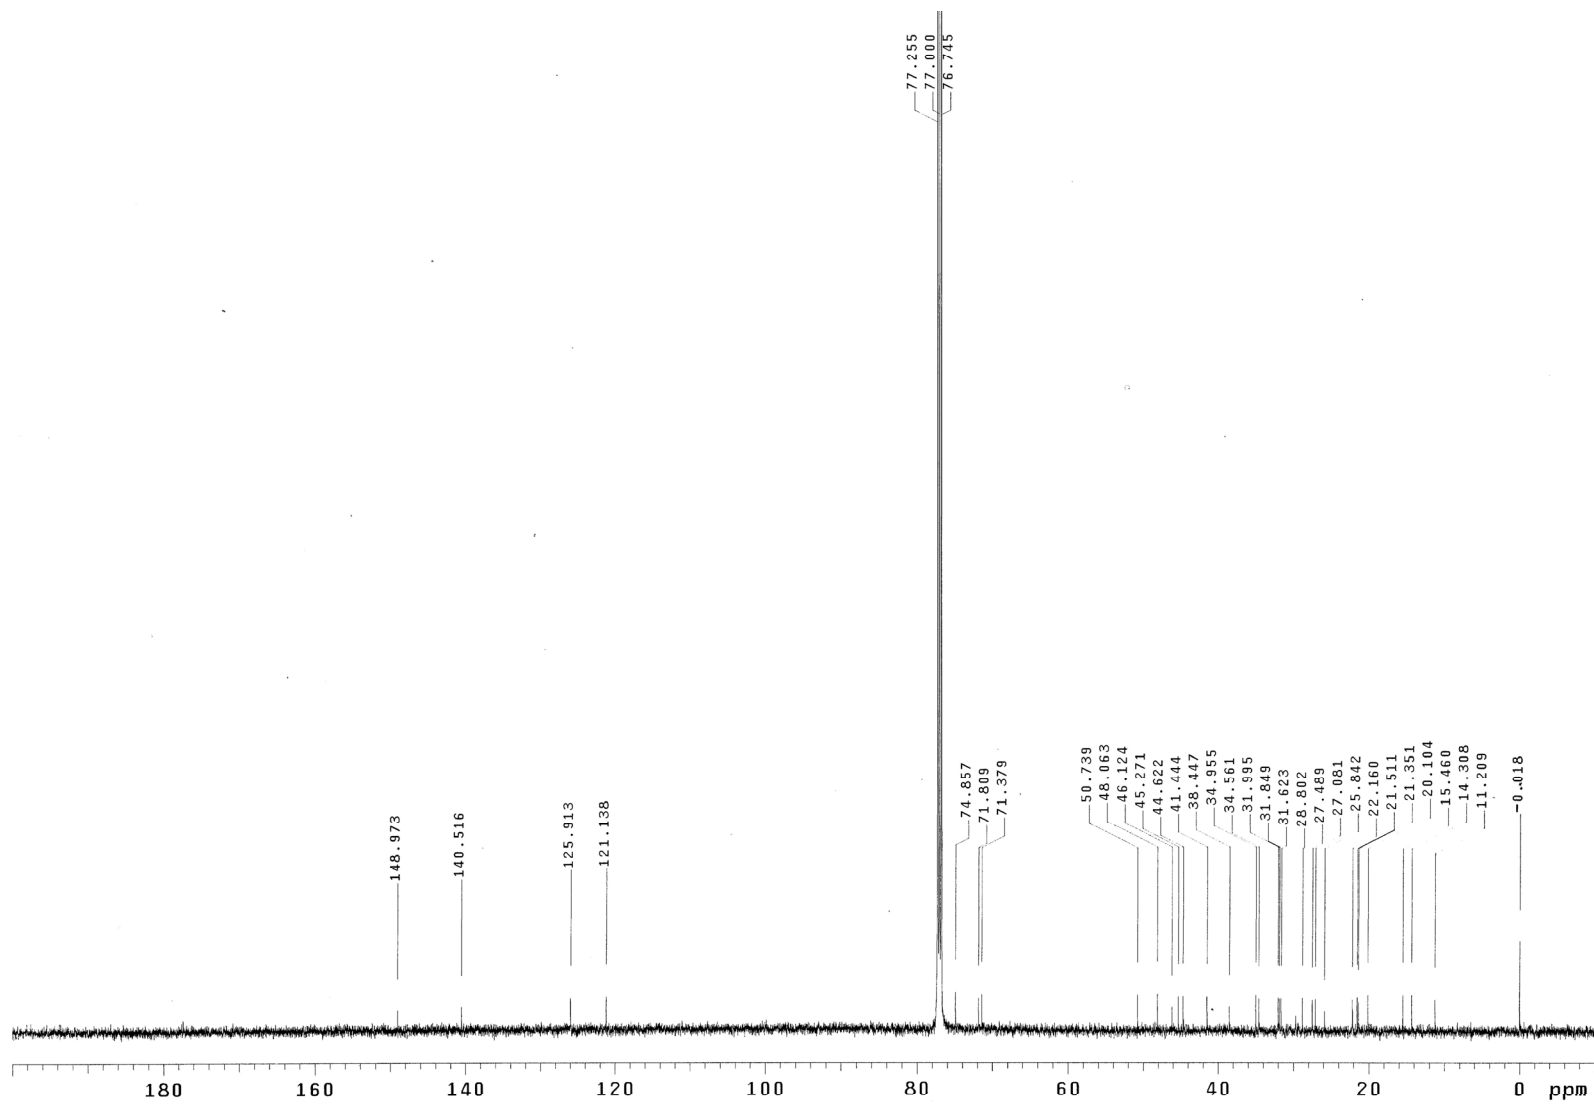

**Figure S5-2.** <sup>13</sup>C NMR spectrum (125 MHz) of compound **5** in CDCl<sub>3</sub>.

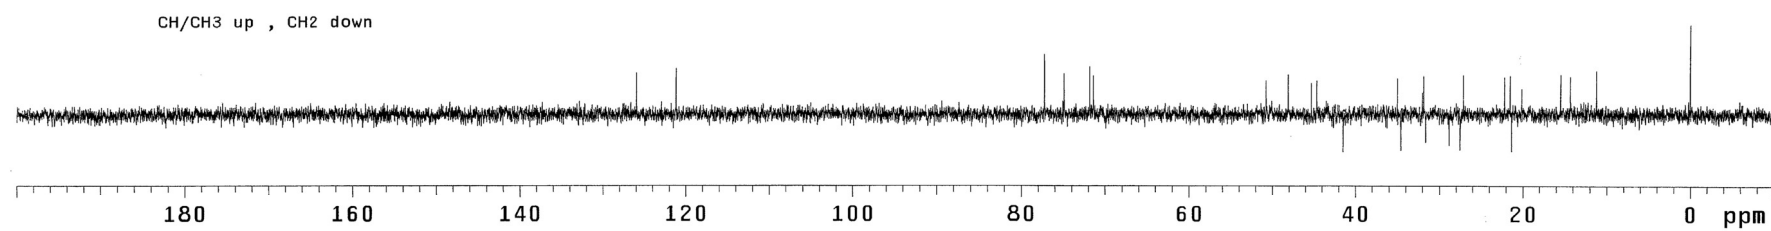

**Figure S5-3.** DEPT spectrum (125 MHz) of compound **5** in CDCl<sub>3</sub>.

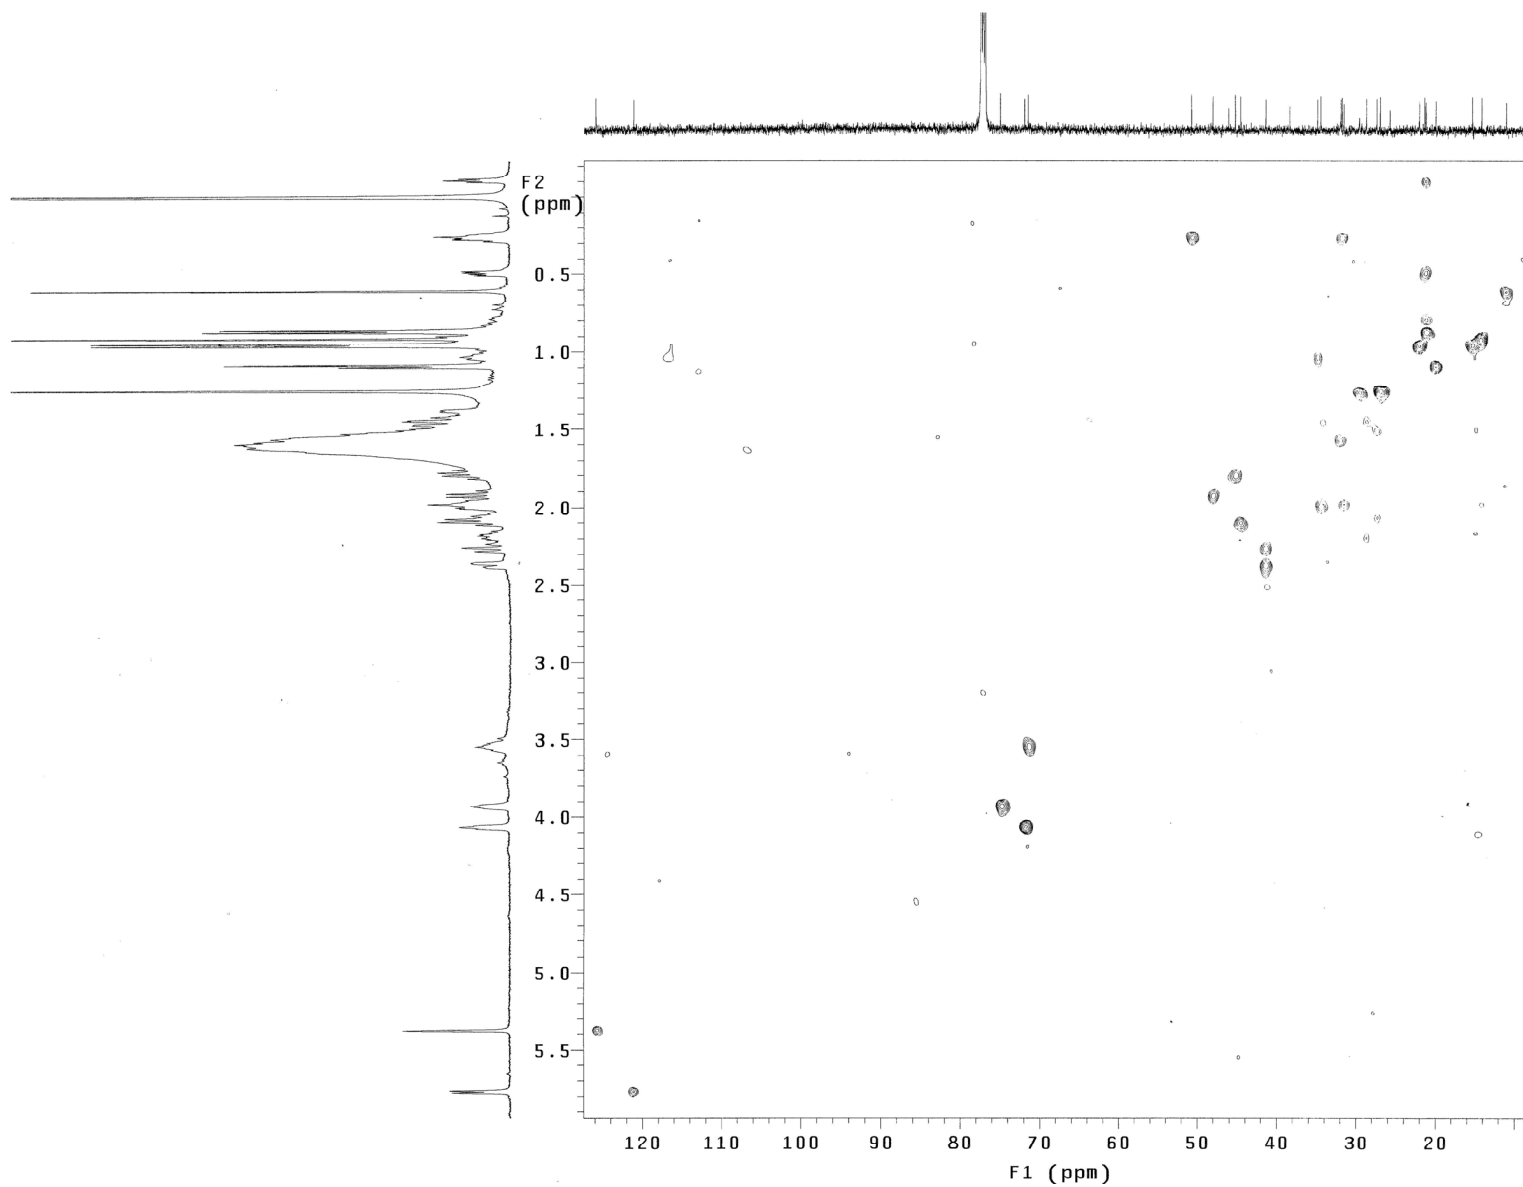

**Figure S5-4.** HMQC spectrum (500 MHz) of compound **5** in CDCl<sub>3</sub>.

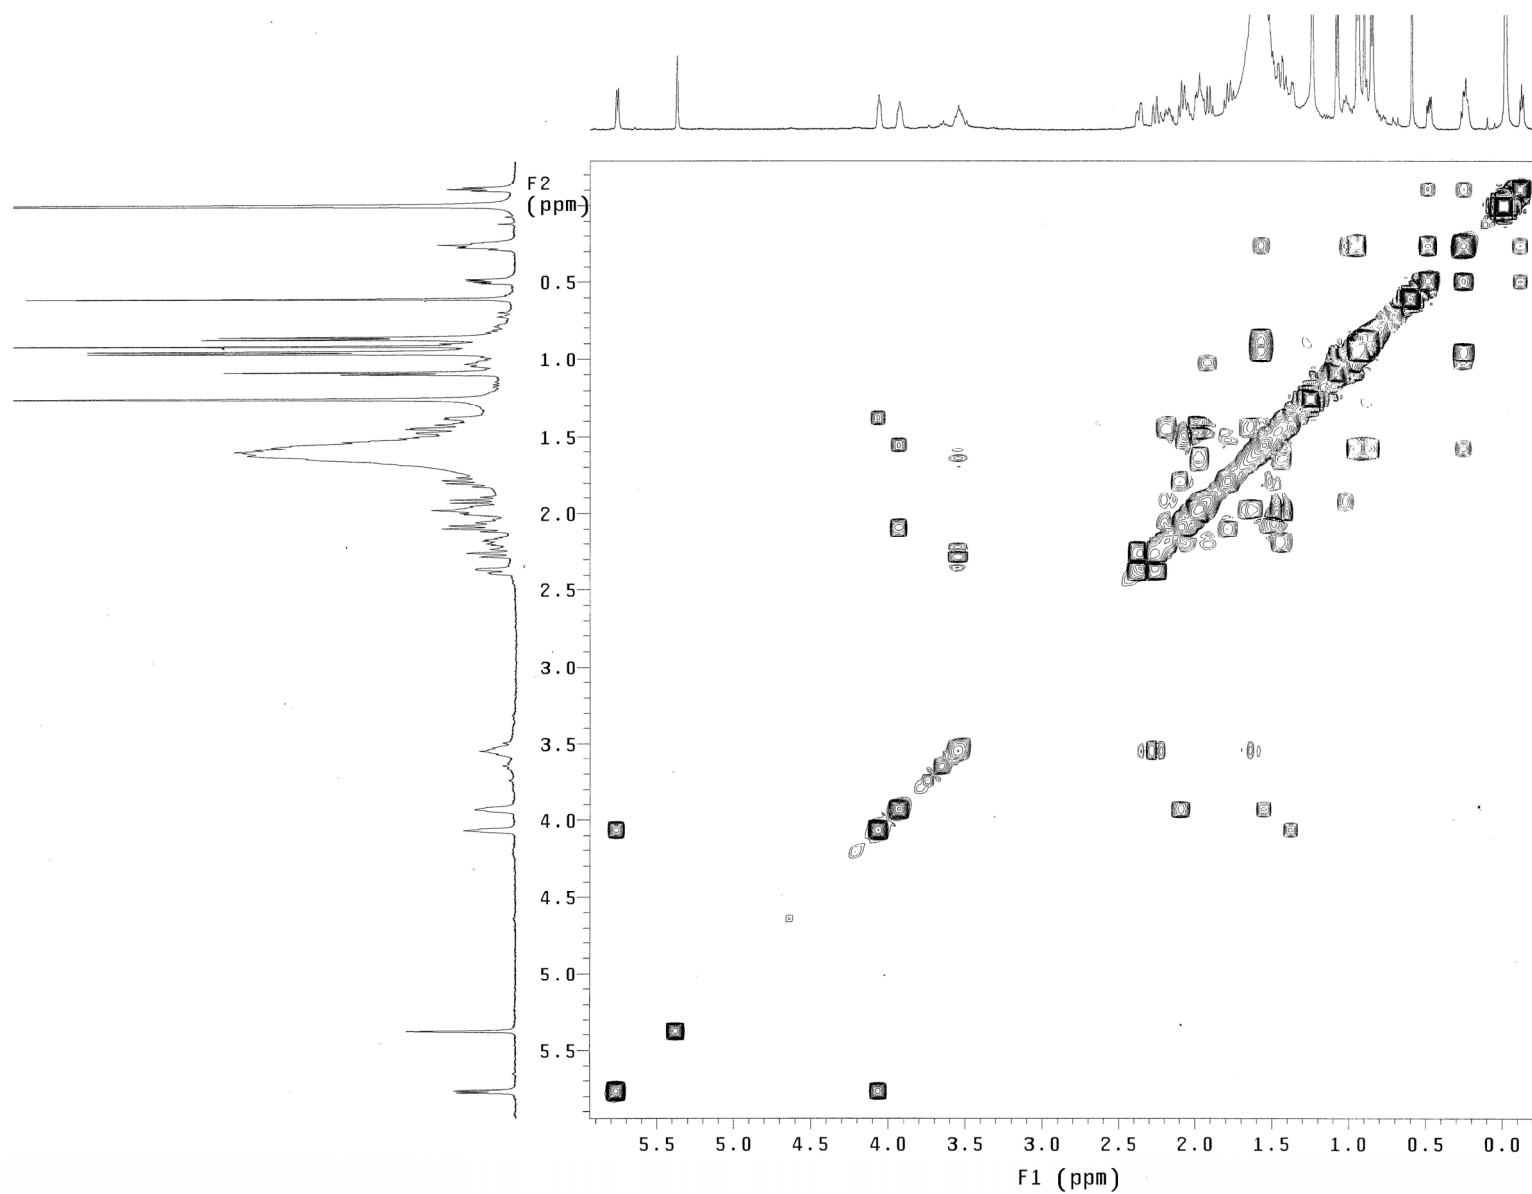

**Figure S5-5.** COSY spectrum (500 MHz) of compound **5** in CDCl<sub>3</sub>.

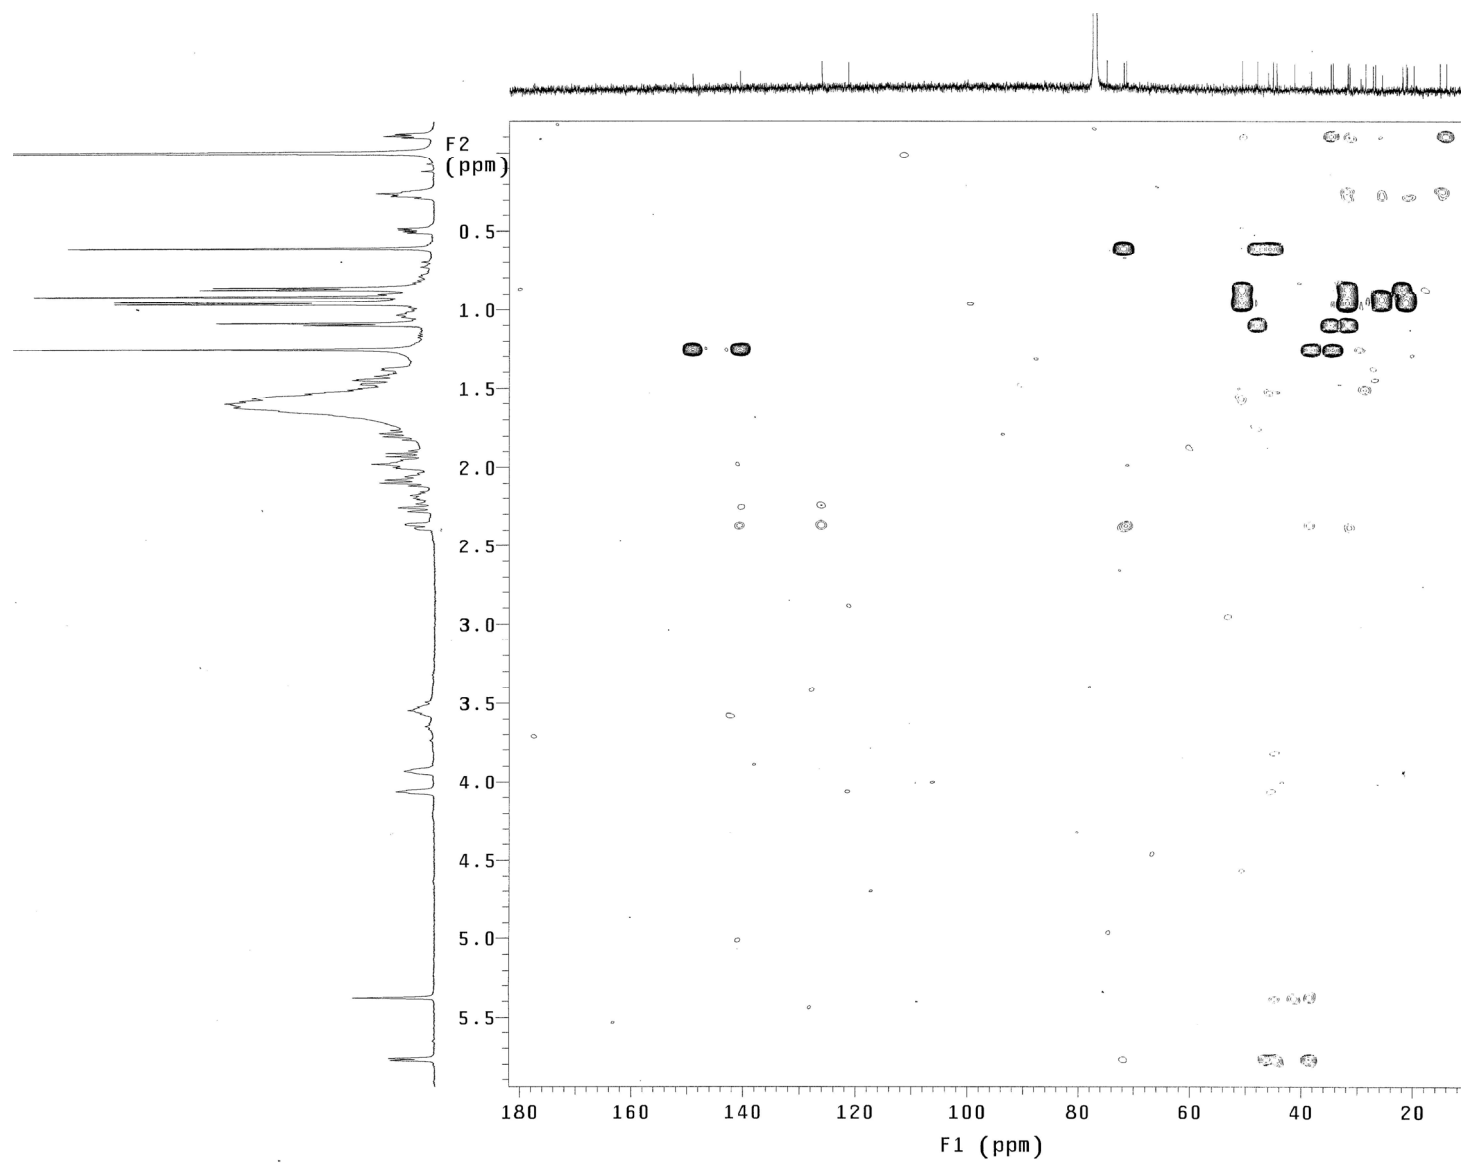

**Figure S5-6.** HMBC spectrum (500 MHz) of compound **5** in CDCl<sub>3</sub>.



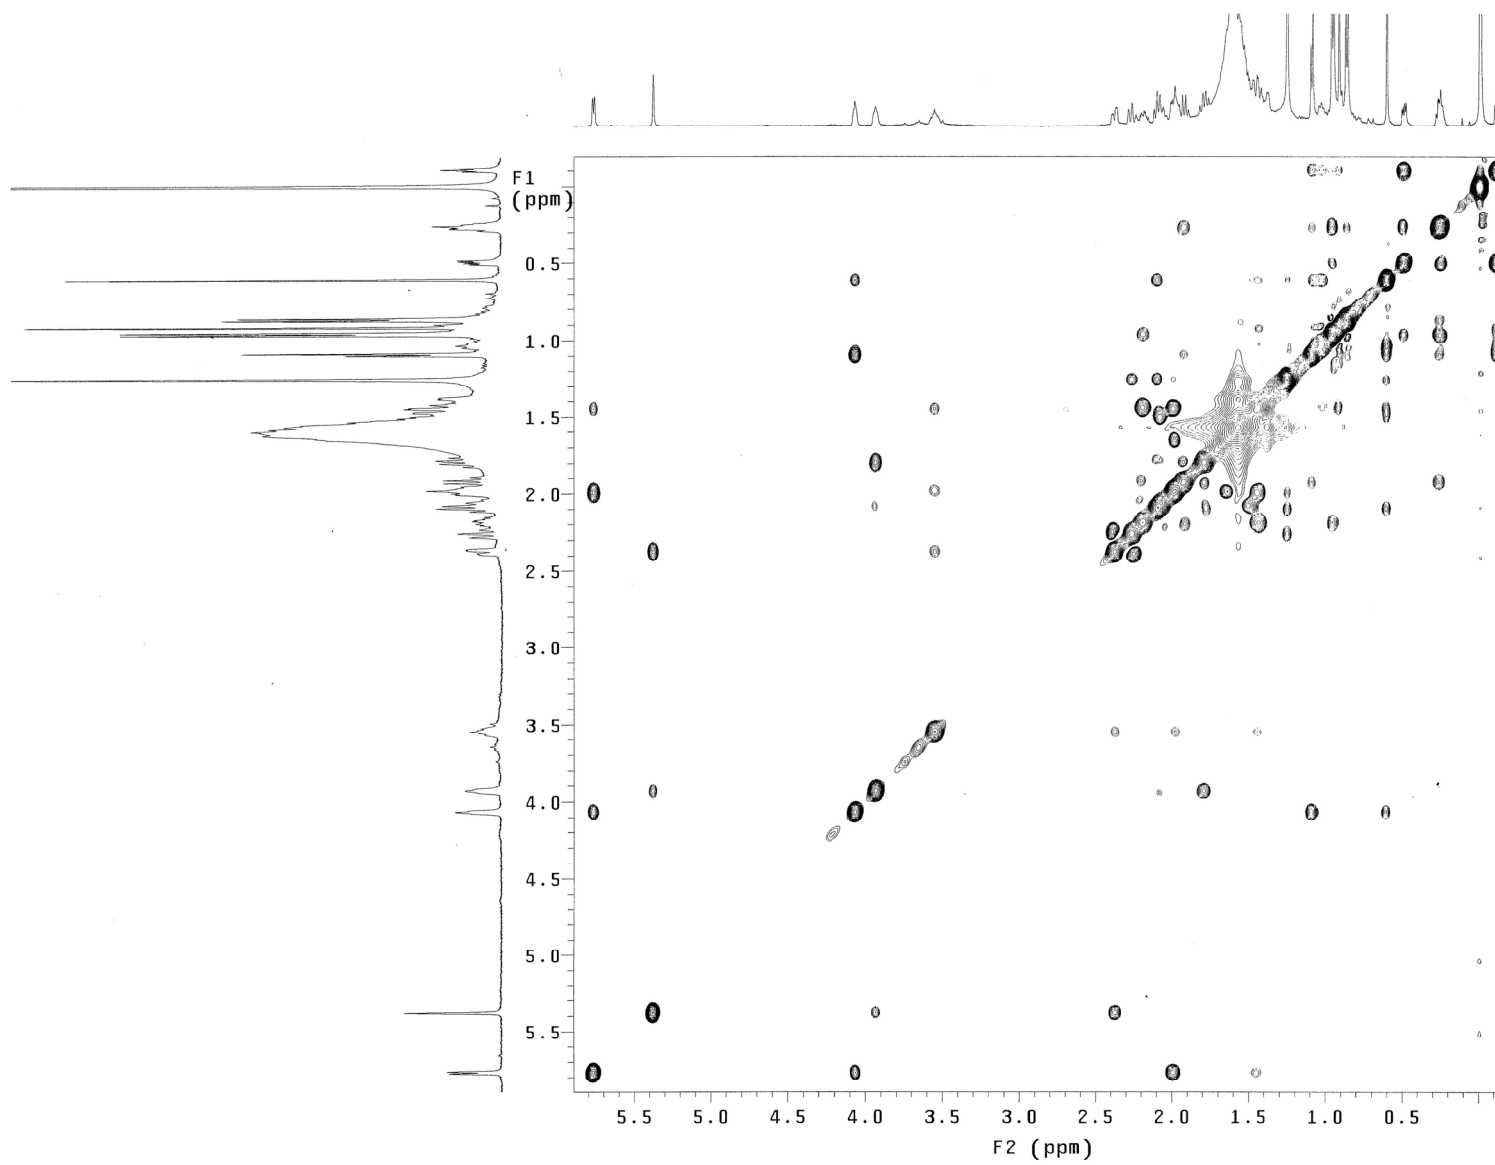

**Figure S5-7.** NOESY spectrum (500 MHz) of compound **5** in CDCl<sub>3</sub>.

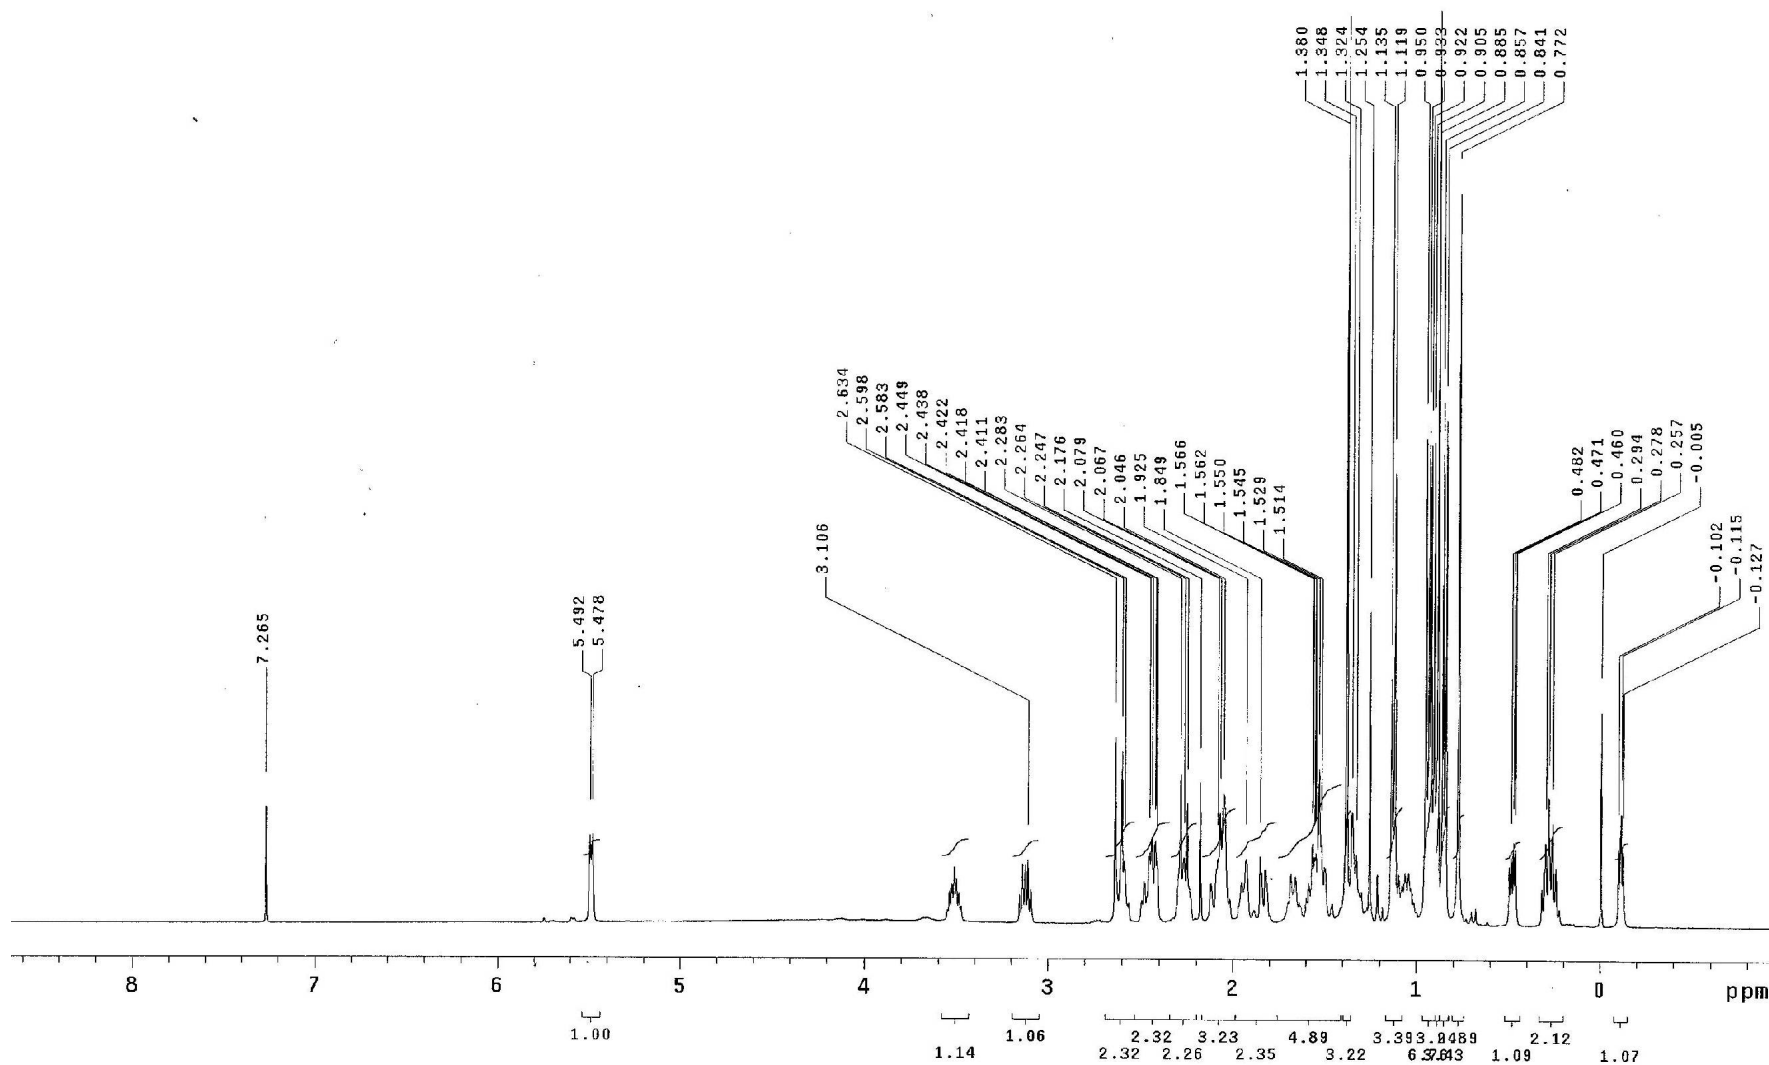

**Figure S6-1.** <sup>1</sup>H NMR spectrum (400 MHz) of compound **6** in CDCl<sub>3</sub>.

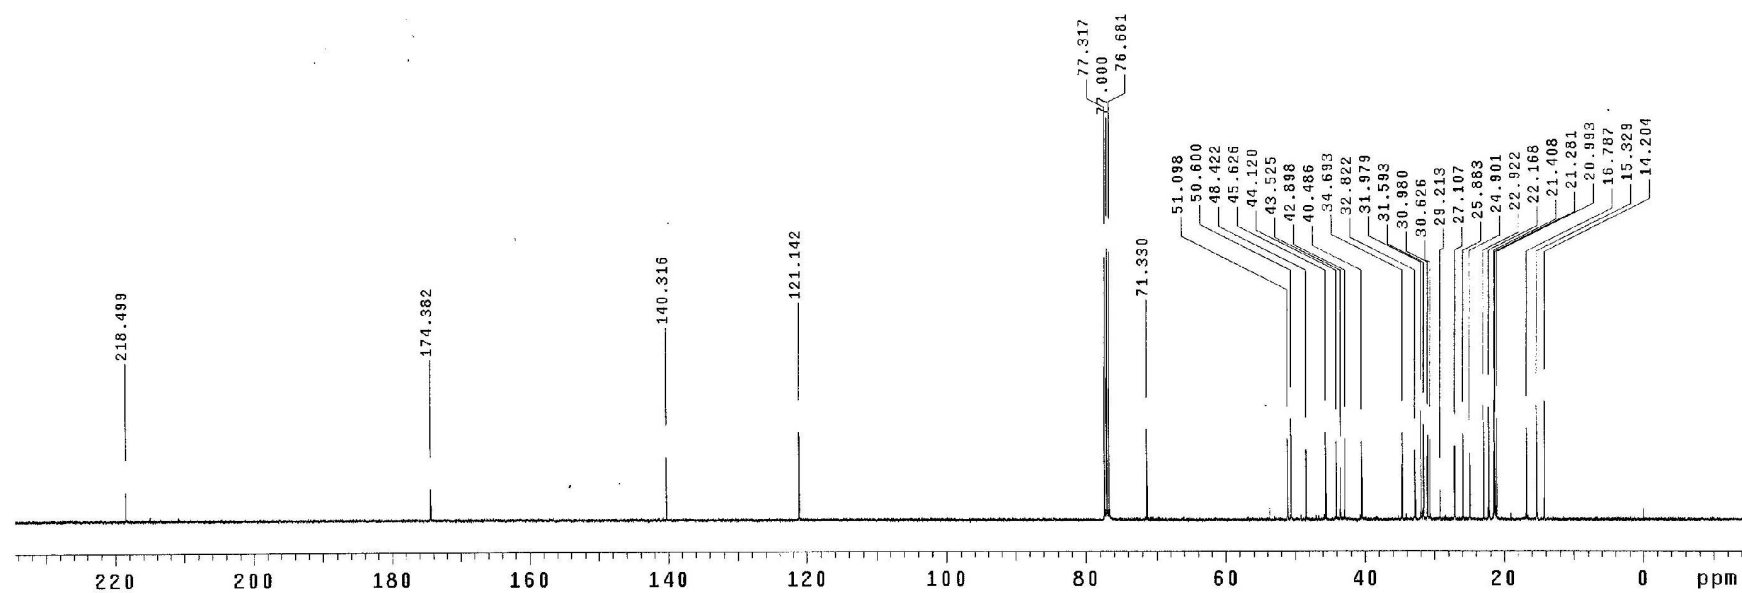

Figure S6-2. <sup>13</sup>C NMR spectrum (100 MHz) of compound 6 in CDCl<sub>3</sub>.

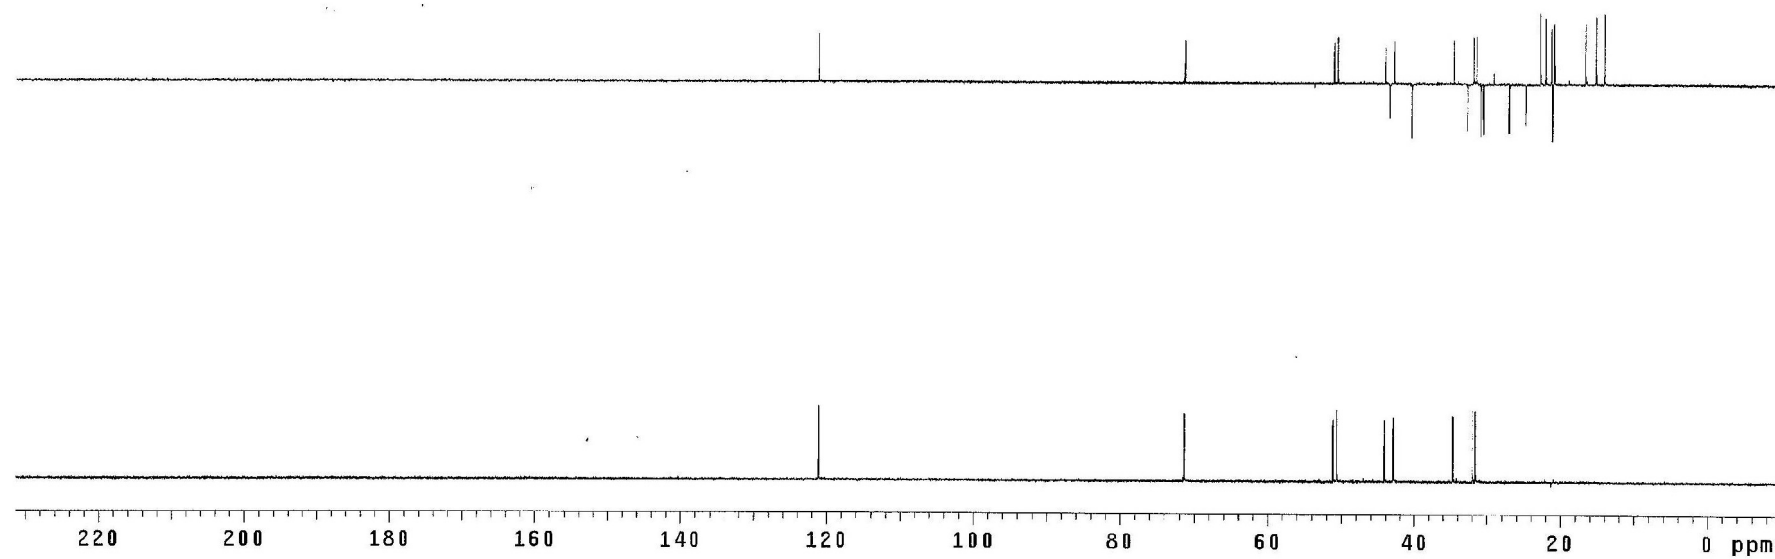

**Figure S6-3.** DEPT spectra (100 MHz) of compound **6** in CDCl<sub>3</sub>.

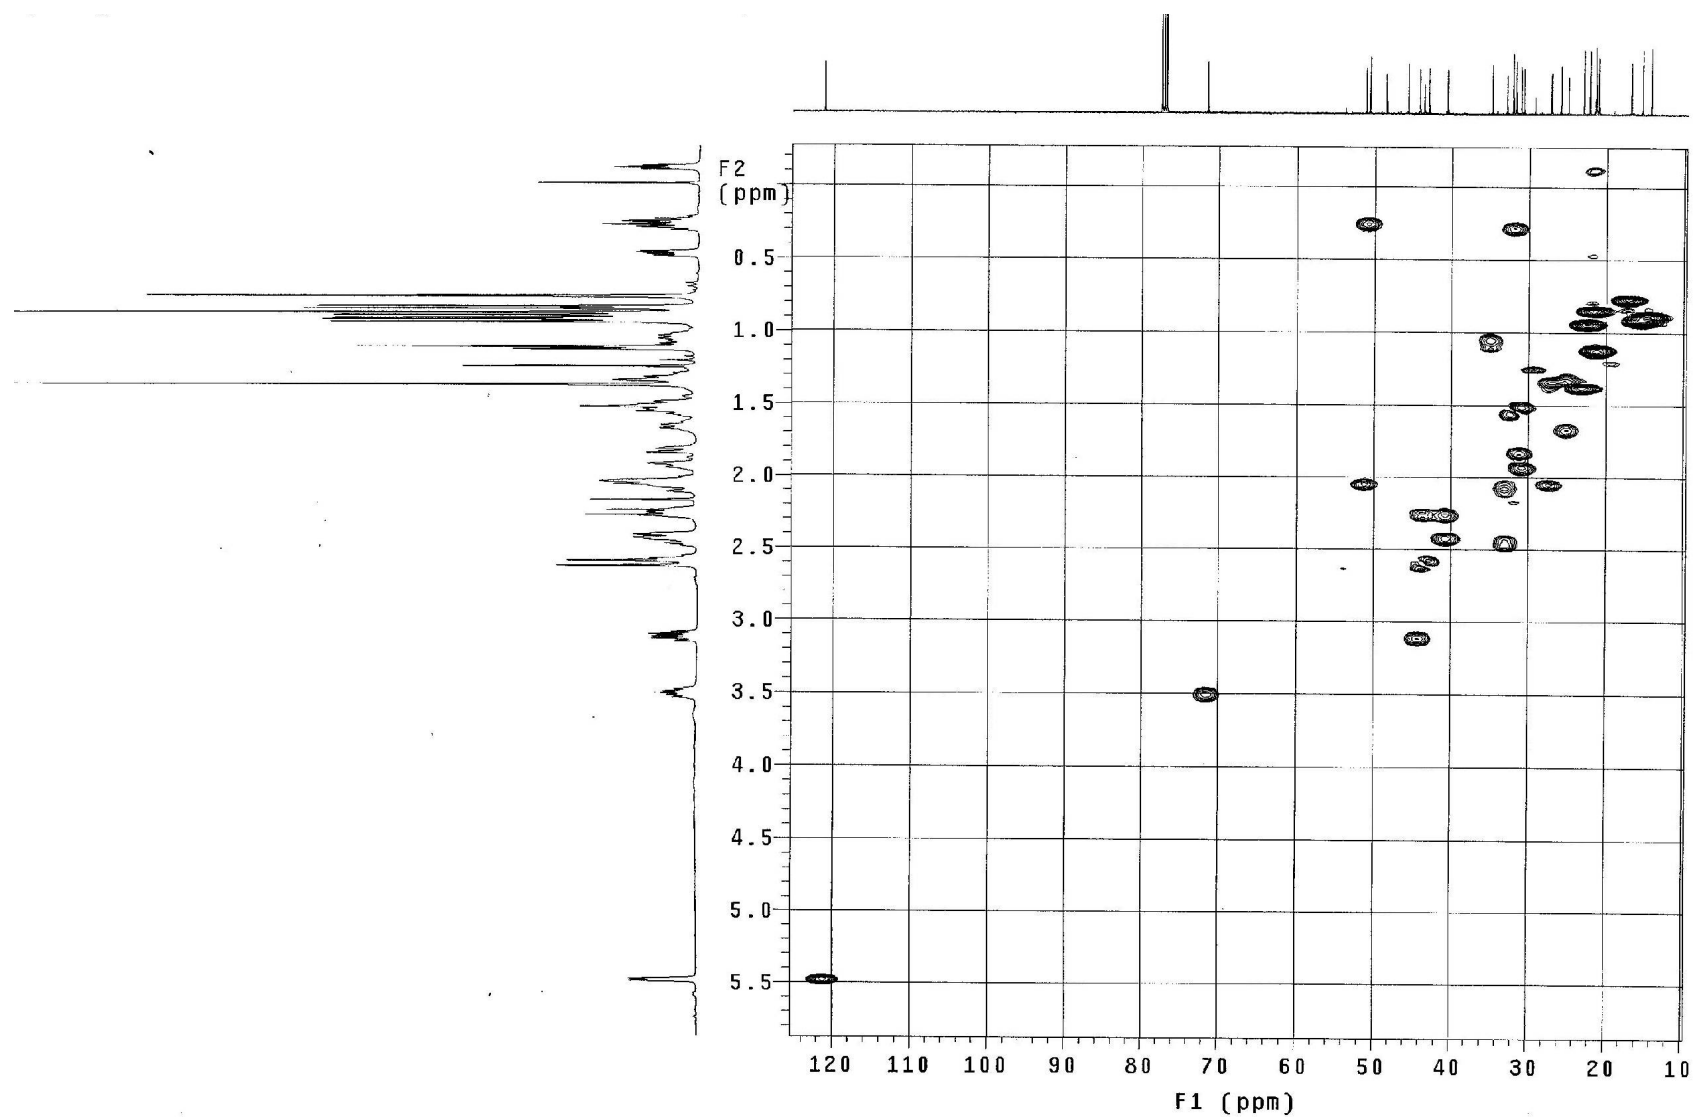

**Figure S6-4.** HMQC spectrum (400 MHz) of compound **6** in  $\text{CDCl}_3$ .

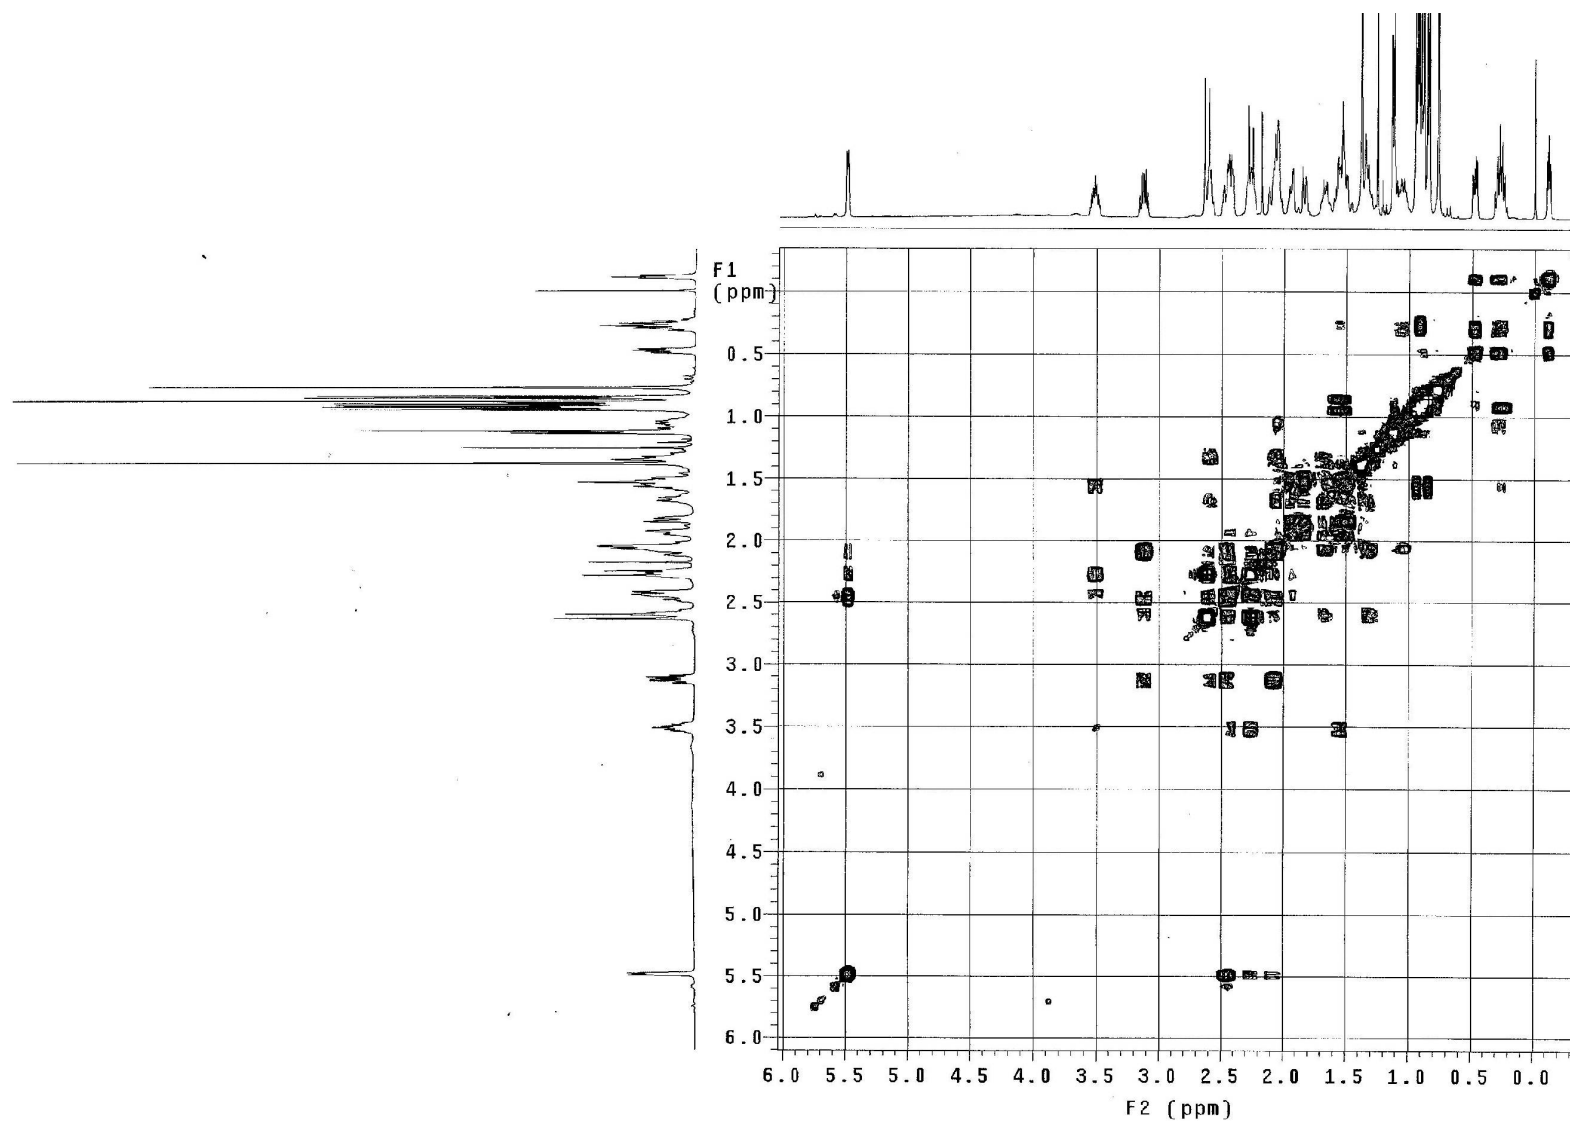

**Figure S6-5.** COSY spectrum (400 MHz) of compound **6** in CDCl<sub>3</sub>.

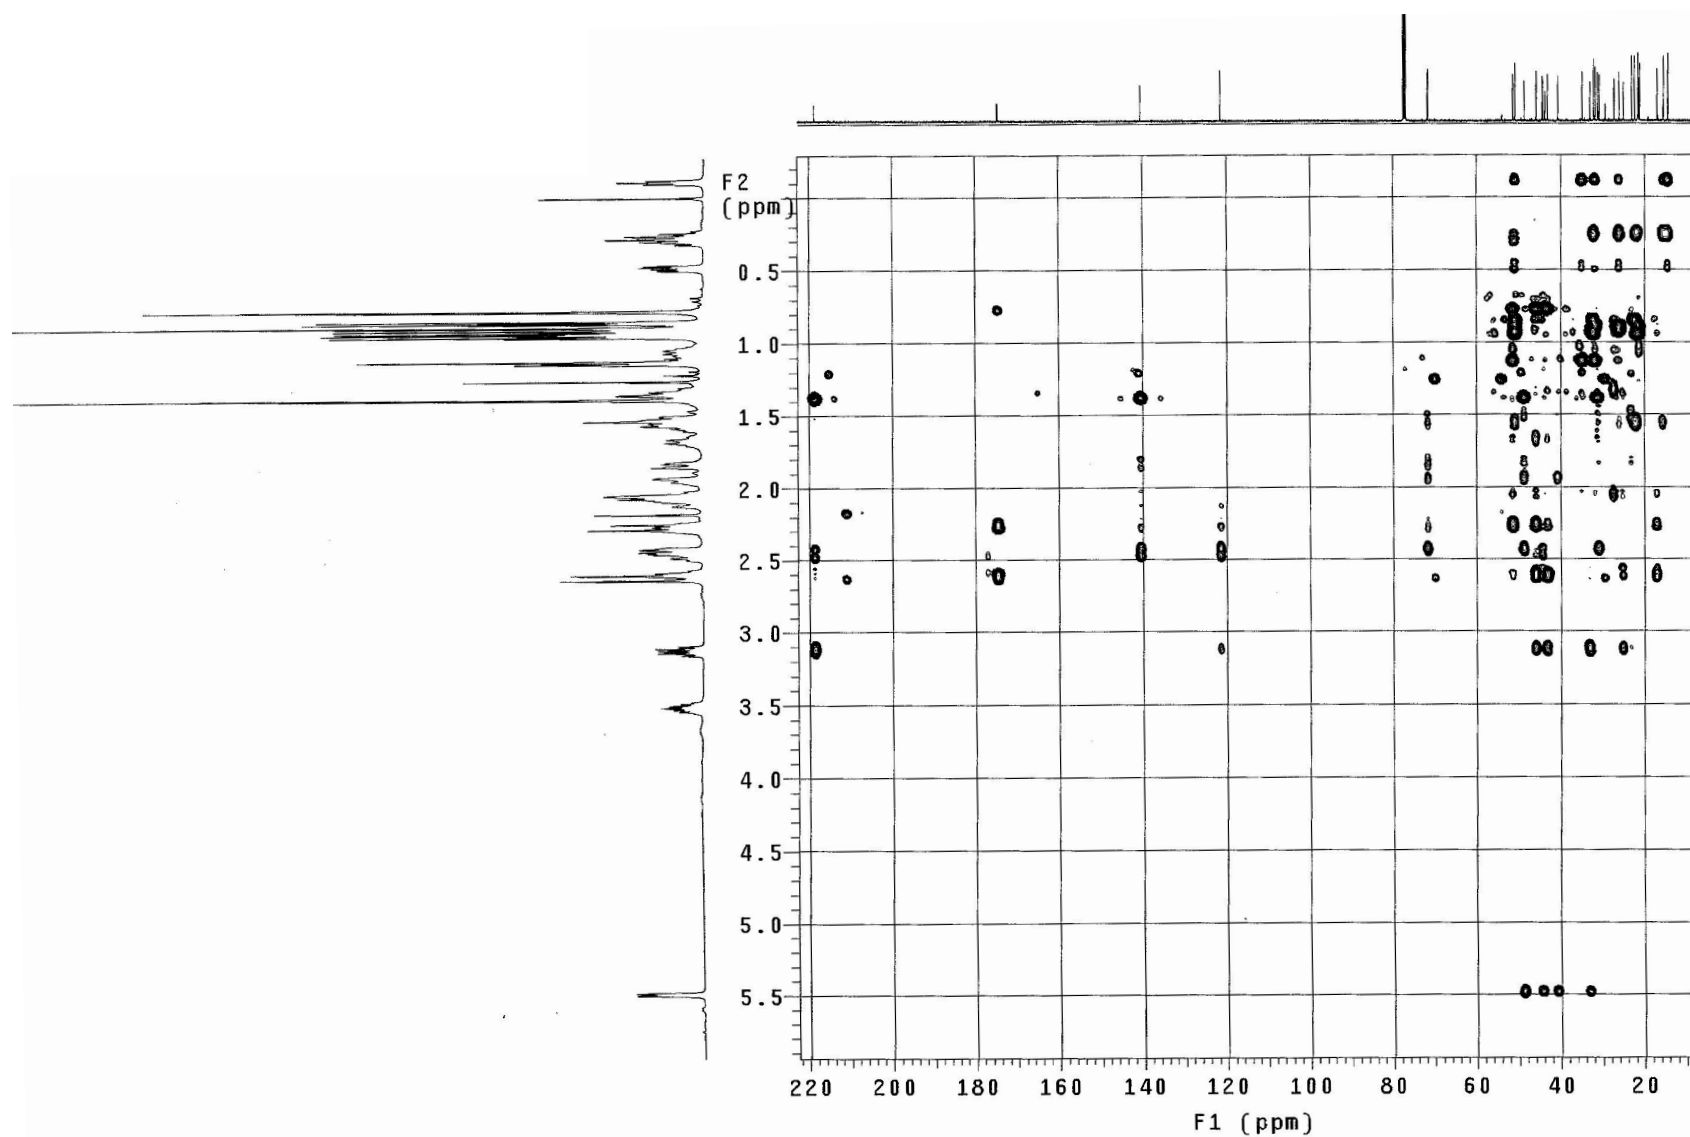

**Figure S6-6.** HMBC spectrum (400 MHz) of compound **6** in  $\text{CDCl}_3$ .

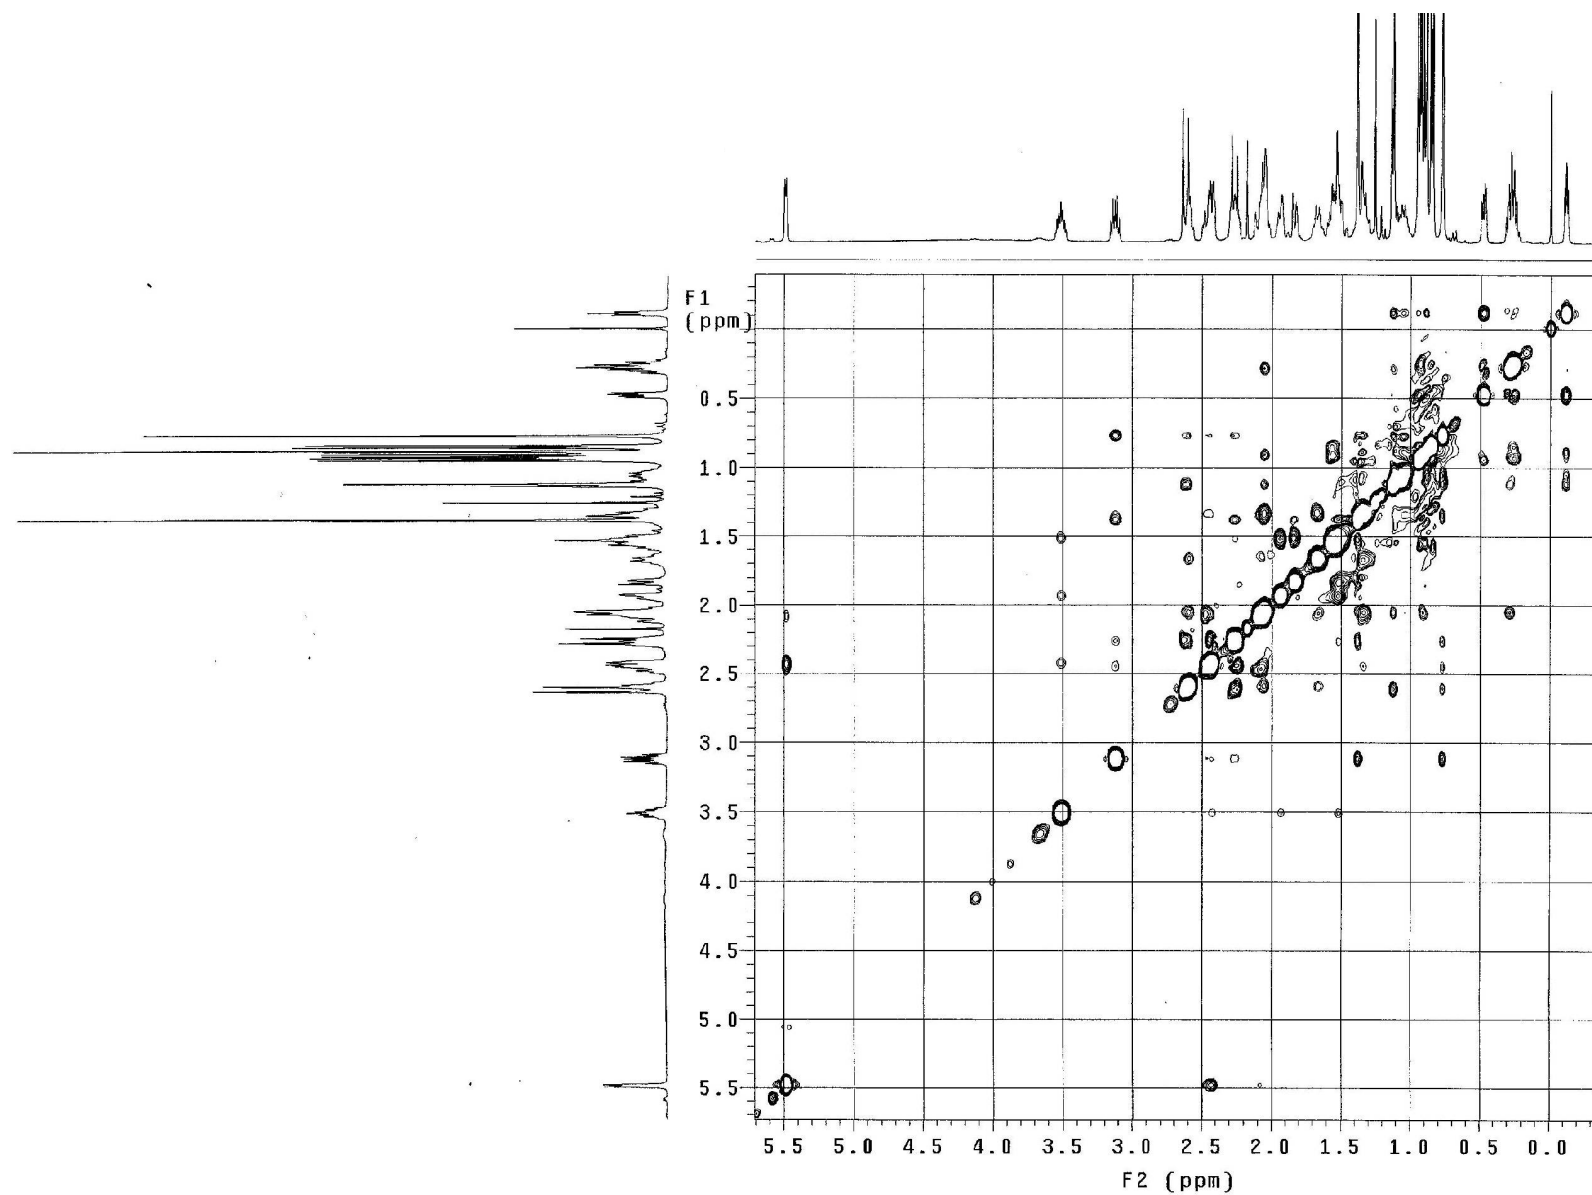

**Figure S6-7.** NOESY spectrum (400 MHz) of compound **6** in CDCl<sub>3</sub>.
